# Supplementary material for: S(vi) in three-component sulfonamide synthesis: use of sulfuric chloride as a linchpin in palladium-catalyzed Suzuki–Miyaura coupling
Source: Royal Society of Chemistry journal article supplement (doi:10.1039/d1sc01351c), 2021-01-01

# **S(VI) in Three-Component Sulfonamide Synthesis: Use of Sulfuric Chloride as Linchpin in Palladium-Catalyzed Suzuki-Miyaura Coupling**

Xuefeng Wang, Min Yang, Shengqing Ye, Yunyan Kuang and Jie Wu\*

## *Supporting Information*

1. General experimental methods (S2).
2. Early investigations using morpholine-4-sulfonyl chloride (S3).
3. Optimization of “standard conditions” (S4–S6).
4. General experimental procedure (S7–S8).
5. Characterization data (S9 – S24).
6.  $^1\text{H}$ ,  $^{13}\text{C}$  and  $^{19}\text{F}$  NMR spectra of compounds **3** and **4** (S25 – S79).

## 1. General experimental methods:

Unless otherwise stated, all commercial reagents were used as received. PdCl<sub>2</sub>(PhCN)<sub>2</sub>, phosphine ligands, boronic acids and amines (except morpholine) are purchased from *Bidepharm* and used as received. Morpholine (99.9%, GC) and tetrahydrofuran (THF, 99.5%, *Energysel*, Extra Dry, with molecular sieves, Water ≤ 50 ppm) were purchased from *Energy Chemical* and used as received. Acetonitrile (MeCN, 99.9%, SafeDry, with molecular sieves, Water ≤ 50 ppm) was purchased from *Adamas-Beta* and used as received. Flash column chromatography was performed using silica gel (300-400 mesh, standard grade). Analytical thin-layer chromatography was performed using glass plates pre-coated with 0.25 mm 230–400 mesh silica gel impregnated with a fluorescent indicator (254 nm). Thin layer chromatography plates were visualized by exposure to 254 nm ultraviolet light or iodine stain. Organic solutions were concentrated on rotary evaporators at ~20 Torr at 30–50°C. Nuclear magnetic resonance (NMR) spectra are recorded in parts per million (ppm) from solvent residual peak on the  $\delta$  scale. <sup>1</sup>H, <sup>13</sup>C and <sup>19</sup>F NMR spectra were recorded in chloroform-*d* or acetone-*d*<sub>6</sub> on a Bruker DRX-400 spectrometer operating at 400 MHz, 101 MHz and 376 MHz, respectively. All chemical shift values are quoted in ppm and coupling constants quoted in Hz. Melting points are tested automatically on a Melting Point Apparatus produced by *Shanghai JINGMI Scientific Instruments Co., Ltd.* High resolution mass spectrometry (HRMS) spectra were obtained on a Bruker McriOTOF11 Instrument.

## 2. Early investigations using Morpholine-4-sulfonyl chloride

Yields were determined by <sup>1</sup>H NMR using 1,3,5-trimethoxybenzene as internal standard.

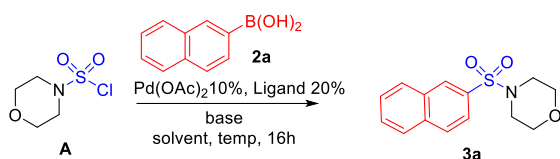

| Entry | Solvent         | Ligand                                                                                                            | Base                                 | Temp.     | Yield <b>3a</b> (%) |
|-------|-----------------|-------------------------------------------------------------------------------------------------------------------|--------------------------------------|-----------|---------------------|
| 1     | dioxane         | P <sup>t</sup> Bu <sub>3</sub> -HBF <sub>4</sub>                                                                  | <u>Na<sub>2</sub>CO<sub>3</sub></u>  | 70        | n.d.                |
| 2     | dioxane         | P <sup>t</sup> Bu <sub>3</sub> -HBF <sub>4</sub>                                                                  | <u>K<sub>2</sub>CO<sub>3</sub></u>   | 70        | n.d.                |
| 3     | dioxane         | P <sup>t</sup> Bu <sub>3</sub> -HBF <sub>4</sub>                                                                  | <u>KOAc</u>                          | 70        | n.d.                |
| 4     | dioxane         | P <sup>t</sup> Bu <sub>3</sub> -HBF <sub>4</sub>                                                                  | <u>Na<sub>2</sub>SO<sub>3</sub></u>  | 70        | 14                  |
| 5     | dioxane         | P <sup>t</sup> Bu <sub>3</sub> -HBF <sub>4</sub>                                                                  | <u>Na<sub>2</sub>HPO<sub>4</sub></u> | 70        | trace               |
| 6     | dioxane         | P <sup>t</sup> Bu <sub>3</sub> -HBF <sub>4</sub>                                                                  | <u>K<sub>2</sub>HPO<sub>4</sub></u>  | 70        | trace               |
| 7     | <u>DMF</u>      | P <sup>t</sup> Bu <sub>3</sub> -HBF <sub>4</sub>                                                                  | Na <sub>2</sub> SO <sub>3</sub>      | 70        | trace               |
| 8     | <u>MeCN</u>     | P <sup>t</sup> Bu <sub>3</sub> -HBF <sub>4</sub>                                                                  | Na <sub>2</sub> SO <sub>3</sub>      | 70        | 15                  |
| 9     | <u>p-Xylene</u> | P <sup>t</sup> Bu <sub>3</sub> -HBF <sub>4</sub>                                                                  | Na <sub>2</sub> SO <sub>3</sub>      | 70        | n.d.                |
| 10    | <u>DME</u>      | P <sup>t</sup> Bu <sub>3</sub> -HBF <sub>4</sub>                                                                  | Na <sub>2</sub> SO <sub>3</sub>      | 70        | n.d.                |
| 11    | <u>THF</u>      | P <sup>t</sup> Bu <sub>3</sub> -HBF <sub>4</sub>                                                                  | Na <sub>2</sub> SO <sub>3</sub>      | 70        | 23                  |
| 12    | THF             | <u>dppe, dcpp-HBF<sub>4</sub>, XPhos, <sup>t</sup>BuXPhos, P(o-tol)<sub>3</sub>, JohnPhos, SPhos, BINAP, dppf</u> | Na <sub>2</sub> SO <sub>3</sub>      | 70        | n.d.                |
| 13    | THF             | <u>PPh<sub>3</sub></u>                                                                                            | Na <sub>2</sub> SO <sub>3</sub>      | 70        | trace               |
| 14    | THF             | <u>PAr<sub>3</sub> Ar=2,6-di-OMe-C<sub>6</sub>H<sub>3</sub></u>                                                   | Na <sub>2</sub> SO <sub>3</sub>      | 70        | 57                  |
| 15    | THF             | <u>DavePhos</u>                                                                                                   | Na <sub>2</sub> SO <sub>3</sub>      | 70        | 30                  |
| 16    | THF             | <u>BrettPhos</u>                                                                                                  | Na <sub>2</sub> SO <sub>3</sub>      | 70        | 45                  |
| 17    | <u>THF/MeCN</u> | <u>PAr<sub>3</sub> Ar=2,6-di-OMe-C<sub>6</sub>H<sub>3</sub></u>                                                   | Na <sub>2</sub> SO <sub>3</sub>      | 70        | 67                  |
| 18    | THF/MeCN        | <u>PAr<sub>3</sub> Ar=2,5-di-Me-C<sub>6</sub>H<sub>3</sub></u>                                                    | Na <sub>2</sub> SO <sub>3</sub>      | 70        | 30                  |
| 19    | THF/MeCN        | <u>PAr<sub>3</sub> Ar=o-OMe-C<sub>6</sub>H<sub>4</sub></u>                                                        | Na <sub>2</sub> SO <sub>3</sub>      | 70        | 50                  |
| 20    | THF/MeCN        | <u>PAr<sub>3</sub> Ar=m-OMe-C<sub>6</sub>H<sub>4</sub></u>                                                        | Na <sub>2</sub> SO <sub>3</sub>      | 70        | 62                  |
| 21    | THF/MeCN        | <u>PAr<sub>3</sub> Ar=p-OMe-C<sub>6</sub>H<sub>4</sub></u>                                                        | Na <sub>2</sub> SO <sub>3</sub>      | 70        | 66                  |
| 22    | <b>THF/MeCN</b> | <b><u>PAr<sub>3</sub> Ar=2,6-di-OMe-C<sub>6</sub>H<sub>3</sub></u></b>                                            | <b>Na<sub>2</sub>SO<sub>3</sub></b>  | <b>70</b> | <b>72</b>           |

### 3. Optimization of “standard conditions”

Yields were determined by <sup>1</sup>H NMR using 1,3,5-trimethoxybenzene as internal standard.

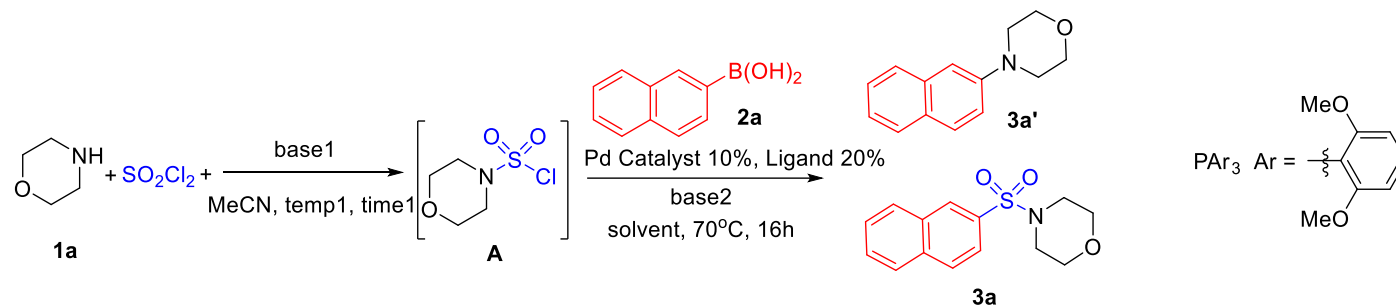

| Entry | SO <sub>2</sub> Cl <sub>2</sub> (eq) | Base1 (eq)             | Temp1(°C) | Time(h) | Pd catalyst          | Ligand           | Base2 (3.0 eq)                  | Solvent (ratio) | 3a' yield(%) | 3a yield (%)  |
|-------|--------------------------------------|------------------------|-----------|---------|----------------------|------------------|---------------------------------|-----------------|--------------|---------------|
| 1     | 1.5                                  | Et <sub>3</sub> N(1.2) | r.t.      | 0.1667  | Pd(OAc) <sub>2</sub> | PAR <sub>3</sub> | Na <sub>2</sub> SO <sub>3</sub> | THF/MeCN 1:1    | 15           | 39            |
| 2     | 1.5                                  | Et <sub>3</sub> N(1.2) | r.t.      | 0.5     | Pd(OAc) <sub>2</sub> | PAR <sub>3</sub> | Na <sub>2</sub> SO <sub>3</sub> | THF/MeCN 1:1    | 40           | 36            |
| 3     | 1.5                                  | Et <sub>3</sub> N(1.5) | r.t.      | 0.5     | Pd(OAc) <sub>2</sub> | PAR <sub>3</sub> | Na <sub>2</sub> SO <sub>3</sub> | THF/MeCN 1:1    | 30           | 51            |
| 4     | 2.0                                  | Et <sub>3</sub> N(1.2) | r.t.      | 0.5     | Pd(OAc) <sub>2</sub> | PAR <sub>3</sub> | Na <sub>2</sub> SO <sub>3</sub> | THF/MeCN 1:1    | 60           | 26            |
| 5     | 1.5                                  | Et <sub>3</sub> N(1.2) | r.t.      | 0.5     | Pd(OAc) <sub>2</sub> | PAR <sub>3</sub> | Na <sub>2</sub> SO <sub>3</sub> | THF/MeCN 1:1    | 63           | 20(2a 1.0 eq) |
| 6     | 1.5                                  | Et <sub>3</sub> N(2.1) | r.t.      | 0.5     | Pd(OAc) <sub>2</sub> | PAR <sub>3</sub> | Na <sub>2</sub> SO <sub>3</sub> | THF/MeCN 1:1    | 23           | 50            |
| 7     | 1.5                                  | DIPEA(1.5)             | r.t.      | 0.5     | Pd(OAc) <sub>2</sub> | PAR <sub>3</sub> | Na <sub>2</sub> SO <sub>3</sub> | THF/MeCN 1:1    | 27           | 36            |
| 8     | 1.5                                  | Et <sub>3</sub> N(1.5) | Reflux    | 0.5     | Pd(OAc) <sub>2</sub> | PAR <sub>3</sub> | Na <sub>2</sub> SO <sub>3</sub> | THF/MeCN 1:1    | 24           | 39            |
| 9     | 1.5                                  | Et <sub>3</sub> N(2.0) | Reflux    | 0.5     | Pd(OAc) <sub>2</sub> | PAR <sub>3</sub> | Na <sub>2</sub> SO <sub>3</sub> | THF/MeCN 1:1    | 15           | 34            |
| 10    | 1.8                                  | Et <sub>3</sub> N(1.8) | Reflux    | 0.5     | Pd(OAc) <sub>2</sub> | PAR <sub>3</sub> | Na <sub>2</sub> SO <sub>3</sub> | THF/MeCN 1:1    | 24           | 42            |
| 11    | 1.8                                  | Et <sub>3</sub> N(2.4) | reflux    | 0.5     | Pd(OAc) <sub>2</sub> | PAR <sub>3</sub> | Na <sub>2</sub> SO <sub>3</sub> | THF/MeCN 1:1    | 16           | 42            |

| 12    | 1.8                                  | Et <sub>3</sub> N(3.0)   | reflux    | 0.5     | Pd(OAc) <sub>2</sub> | PAr <sub>3</sub> | Na <sub>2</sub> SO <sub>3</sub> | THF/MeCN 1:1    | 20                  | 37                  |
|-------|--------------------------------------|--------------------------|-----------|---------|----------------------|------------------|---------------------------------|-----------------|---------------------|---------------------|
| Entry | SO <sub>2</sub> Cl <sub>2</sub> (eq) | Base1 (eq)               | Temp1(°C) | Time(h) | Pd catalyst          | Ligand           | Base2 (3.0 eq)                  | Solvent (ratio) | <b>3a'</b> yield(%) | <b>3a</b> yield (%) |
| 13    | 1.8                                  | Et <sub>3</sub> N(2.0)   | r.t.      | 0.5     | Pd(OAc) <sub>2</sub> | PAr <sub>3</sub> | Na <sub>2</sub> SO <sub>3</sub> | THF/MeCN 1:1    | 23                  | 50                  |
| 14    | 1.8                                  | Et <sub>3</sub> N(2.0)   | 50        | 0.5     | Pd(OAc) <sub>2</sub> | PAr <sub>3</sub> | Na <sub>2</sub> SO <sub>3</sub> | THF/MeCN 1:1    | 26                  | 55                  |
| 15    | 1.8                                  | Et <sub>3</sub> N(2.0)   | 70        | 0.5     | Pd(OAc) <sub>2</sub> | PAr <sub>3</sub> | Na <sub>2</sub> SO <sub>3</sub> | THF/MeCN 1:1    | 25                  | 44                  |
| 16    | 1.8                                  | Et <sub>3</sub> N(2.0)   | 90        | 0.5     | Pd(OAc) <sub>2</sub> | PAr <sub>3</sub> | Na <sub>2</sub> SO <sub>3</sub> | THF/MeCN 1:1    | 32                  | 30                  |
| 17    | 1.8                                  | Et <sub>3</sub> N(2.0)   | 50        | 1.0     | Pd(OAc) <sub>2</sub> | PAr <sub>3</sub> | Na <sub>2</sub> SO <sub>3</sub> | THF/MeCN 1:1    | 24                  | 53                  |
| 18    | 1.8                                  | Et <sub>3</sub> N(2.0)   | 50        | 1.5     | Pd(OAc) <sub>2</sub> | PAr <sub>3</sub> | Na <sub>2</sub> SO <sub>3</sub> | THF/MeCN 1:1    | 26                  | 48                  |
| 19    | 1.8                                  | Et <sub>3</sub> N(2.0)   | 50        | 2.0     | Pd(OAc) <sub>2</sub> | PAr <sub>3</sub> | Na <sub>2</sub> SO <sub>3</sub> | THF/MeCN 1:1    | 20                  | 47                  |
| 20    | 1.8                                  | Et <sub>3</sub> N(2.0)   | 50        | 0.5     | Pd(OAc) <sub>2</sub> | PAr <sub>3</sub> | Na <sub>2</sub> SO <sub>3</sub> | THF/MeCN 1:1    | 38                  | 50                  |
| 21    | 2.5                                  | Et <sub>3</sub> N(2.65)  | 50        | 0.5     | Pd(OAc) <sub>2</sub> | PAr <sub>3</sub> | Na <sub>2</sub> SO <sub>3</sub> | THF/MeCN 1:1    | 31                  | 64                  |
| 22    | 3.0                                  | Et <sub>3</sub> N(3.1)   | 50        | 0.5     | Pd(OAc) <sub>2</sub> | PAr <sub>3</sub> | Na <sub>2</sub> SO <sub>3</sub> | THF/MeCN 1:1    | 52                  | 33                  |
| 23    | 2.5                                  | Et <sub>3</sub> N(1.0)   | 50        | 0.5     | Pd(OAc) <sub>2</sub> | PAr <sub>3</sub> | Na <sub>2</sub> SO <sub>3</sub> | THF/MeCN 1:1    | 40                  | 32                  |
| 24    | 2.5                                  | Et <sub>3</sub> N(1.2)   | 50        | 0.5     | Pd(OAc) <sub>2</sub> | PAr <sub>3</sub> | Na <sub>2</sub> SO <sub>3</sub> | THF/MeCN 1:1    | 29                  | 37                  |
| 25    | 2.5                                  | Et <sub>3</sub> N(1.25)  | 50        | 0.5     | Pd(OAc) <sub>2</sub> | PAr <sub>3</sub> | Na <sub>2</sub> SO <sub>3</sub> | THF/MeCN 1:1    | 39                  | 33                  |
| 26    | 2.5                                  | Et <sub>3</sub> N(1.325) | 50        | 0.5     | Pd(OAc) <sub>2</sub> | PAr <sub>3</sub> | Na <sub>2</sub> SO <sub>3</sub> | THF/MeCN 1:1    | 32                  | 31                  |
| 27    | 2.5                                  | Et <sub>3</sub> N(1.5)   | 50        | 0.5     | Pd(OAc) <sub>2</sub> | PAr <sub>3</sub> | Na <sub>2</sub> SO <sub>3</sub> | THF/MeCN 1:1    | 23                  | 36                  |
| 28    | 2.5                                  | Et <sub>3</sub> N(2.0)   | 50        | 0.5     | Pd(OAc) <sub>2</sub> | PAr <sub>3</sub> | Na <sub>2</sub> SO <sub>3</sub> | THF/MeCN 1:1    | 17                  | 41                  |
| 29    | 2.5                                  | Et <sub>3</sub> N(2.4)   | 50        | 0.5     | Pd(OAc) <sub>2</sub> | PAr <sub>3</sub> | Na <sub>2</sub> SO <sub>3</sub> | THF/MeCN 1:1    | 22                  | 26                  |
| 30    | 2.5                                  | Et <sub>3</sub> N(2.65)  | 50        | 0.5     | Pd(OAc) <sub>2</sub> | PAr <sub>3</sub> | Na <sub>2</sub> SO <sub>3</sub> | THF/MeCN 1:1    | 41                  | 54                  |

|           |                                      |                              |           |            |                                                    |                        |                                               |                     |                     |                     |
|-----------|--------------------------------------|------------------------------|-----------|------------|----------------------------------------------------|------------------------|-----------------------------------------------|---------------------|---------------------|---------------------|
| 31        | 2.5                                  | Et <sub>3</sub> N(2.65)      | 50        | 0.5        | PdCl <sub>2</sub>                                  | PAr <sub>3</sub>       | Na <sub>2</sub> SO <sub>3</sub>               | THF/MeCN 1:1        | 23                  | 47                  |
| 32        | 2.5                                  | Et <sub>3</sub> N(2.65)      | 50        | 0.5        | PdBr <sub>2</sub>                                  | PAr <sub>3</sub>       | Na <sub>2</sub> SO <sub>3</sub>               | THF/MeCN 1:1        | 13                  | 66                  |
| 33        | 2.5                                  | Et <sub>3</sub> N(2.65)      | 50        | 0.5        | Pd(PPh <sub>3</sub> ) <sub>2</sub> Cl <sub>2</sub> | PAr <sub>3</sub>       | Na <sub>2</sub> SO <sub>3</sub>               | THF/MeCN 1:1        | 22                  | 51                  |
| Entry     | SO <sub>2</sub> Cl <sub>2</sub> (eq) | Base1 (eq)                   | Temp1(°C) | Time(h)    | Pd catalyst                                        | Ligand                 | Base2 (3.0 eq)                                | Solvent (ratio)     | <b>3a'</b> yield(%) | <b>3a</b> yield (%) |
| 34        | 2.5                                  | Et <sub>3</sub> N(2.65)      | 50        | 0.5        | Pd(PhCN) <sub>2</sub> Cl <sub>2</sub>              | PAr <sub>3</sub>       | Na <sub>2</sub> SO <sub>3</sub>               | THF/MeCN 1:1        | 16                  | 68                  |
| 35        | 2.5                                  | Et <sub>3</sub> N(2.65)      | 50        | 0.5        | Pd(PhCN) <sub>2</sub> Cl <sub>2</sub>              | PAr <sub>3</sub>       | Na <sub>2</sub> SO <sub>3</sub>               | THF/MeCN 1:1        | 18                  | 73                  |
| 36        | 2.5                                  | Et <sub>3</sub> N(2.65)      | 50        | 0.5        | Pd(PhCN) <sub>2</sub> Cl <sub>2</sub>              | PAr <sub>3</sub>       | Na <sub>2</sub> SO <sub>3</sub>               | THF/MeCN 3:2        | 18                  | 68                  |
| 37        | 2.5                                  | Et <sub>3</sub> N(2.65)      | 50        | 0.5        | Pd(PhCN) <sub>2</sub> Cl <sub>2</sub>              | PAr <sub>3</sub>       | Na <sub>2</sub> SO <sub>3</sub>               | THF/MeCN 2:1        | 19                  | 63                  |
| 38        | 2.5                                  | Et <sub>3</sub> N(2.65)      | 50        | 0.5        | Pd(PhCN) <sub>2</sub> Cl <sub>2</sub>              | PAr <sub>3</sub>       | Na <sub>2</sub> SO <sub>3</sub>               | THF/MeCN 2:3        | 9                   | 68                  |
| 39        | 2.5                                  | Et <sub>3</sub> N(2.65)      | 50        | 0.5        | Pd(PhCN) <sub>2</sub> Cl <sub>2</sub>              | PAr <sub>3</sub>       | Na <sub>2</sub> SO <sub>3</sub>               | dioxane/MeCN 1:1    | 24                  | 66                  |
| 40        | 2.5                                  | Et <sub>3</sub> N(2.65)      | 50        | 0.5        | Pd(PhCN) <sub>2</sub> Cl <sub>2</sub>              | PAr <sub>3</sub>       | Na <sub>2</sub> SO <sub>3</sub>               | dioxane/MeCN 3:2    | 26                  | 57                  |
| 41        | 2.5                                  | Et <sub>3</sub> N(2.65)      | 50        | 0.5        | Pd(PhCN) <sub>2</sub> Cl <sub>2</sub>              | PAr <sub>3</sub>       | K <sub>2</sub> HPO <sub>4</sub>               | THF/MeCN 2:3        | 33                  | 50                  |
| <b>42</b> | <b>2.5</b>                           | <b>Et<sub>3</sub>N(2.65)</b> | <b>50</b> | <b>0.5</b> | <b>Pd(PhCN)<sub>2</sub>Cl<sub>2</sub></b>          | <b>PAr<sub>3</sub></b> | <b>Na<sub>2</sub>HPO<sub>4</sub></b>          | <b>THF/MeCN 2:3</b> | <b>5</b>            | <b>80</b>           |
| 43        | 2.5                                  | Et <sub>3</sub> N(2.65)      | 50        | 0.5        | Pd(PhCN) <sub>2</sub> Cl <sub>2</sub>              | PAr <sub>3</sub>       | K <sub>2</sub> S <sub>2</sub> O <sub>5</sub>  | THF/MeCN 2:3        | 11                  | 78                  |
| 44        | 2.5                                  | Et <sub>3</sub> N(2.65)      | 50        | 0.5        | Pd(PhCN) <sub>2</sub> Cl <sub>2</sub>              | PAr <sub>3</sub>       | Na <sub>2</sub> S <sub>2</sub> O <sub>5</sub> | THF/MeCN 2:3        | 18                  | 68                  |

Entries 23-29: Et<sub>3</sub>N added to SO<sub>2</sub>Cl<sub>2</sub> solution in MeCN, then morpholine added.

## 4. General experimental procedure:

### 4.1 Procedure of Palladium-catalyzed coupling reaction

General experimental procedure for the reaction of secondary amine **1**,  $\text{SO}_2\text{Cl}_2$  and boronic acid **2**. Procedure to product **3aa** is shown below as an example.

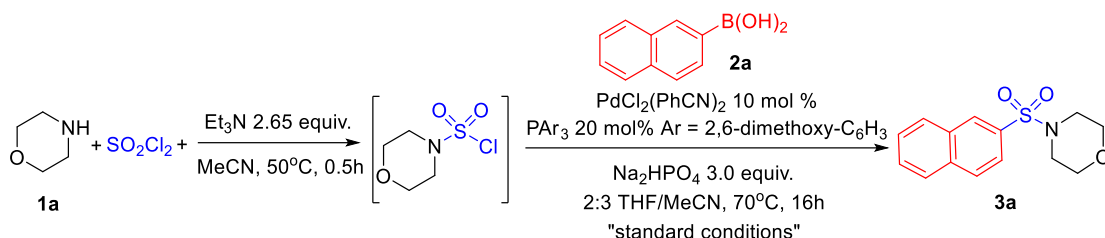

A solution of  $\text{SO}_2\text{Cl}_2$  (0.5 mmol, 2.5 equiv) in MeCN (1.0 mL) was cooled to  $0^\circ\text{C}$  before morpholine **1a**\* (0.2 mmol, 1.0 equiv) was added dropwisely. Then  $\text{Et}_3\text{N}$  (0.53 mmol, 2.65 equiv) was added dropwisely and the mixture was heated to  $50^\circ\text{C}$  for 0.5 h. After the scheduled time, the mixture was cooled to  $-15^\circ\text{C}$  for  $\text{Et}_3\text{N}\cdot\text{HCl}$  to precipitate. The solution was filtered and transferred to a rubber-septa-sealed tube containing a mixture of 2-naphthaleneboronic acid **2a** (0.4 mmol, 2.0 equiv),  $\text{PdCl}_2(\text{PhCN})_2$  (0.02 mmol, 10 mol %), tris(2,6-dimethoxyphenyl)phosphine (0.04 mmol, 20 mol %), and  $\text{Na}_2\text{HPO}_4$  (0.6 mmol, 3.0 equiv) in THF (1.0 mL) under argon. Followed by addition of MeCN (0.5 mL). The mixture was then stirred at  $70^\circ\text{C}$  for 16 h. After the scheduled time, the solvent was evaporated under reduced pressure and the residue was purified directly by flash column chromatography (eluent: 20% EtOAc/*n*-hexane) to afford the corresponding product **3aa** as a white solid (38.1 mg, 69% yield).

\* In cases that amine hydrochloride was used, the amine hydrochloride was treated by 1.0 equiv  $\text{Et}_3\text{N}$  in minimum amount of MeCN before addition to the  $\text{SO}_2\text{Cl}_2$  solution.

### 4.2 Procedure of the Gram-scale synthesis of product **3q**

#### 4.2.1 Procedure using 10% Pd catalyst

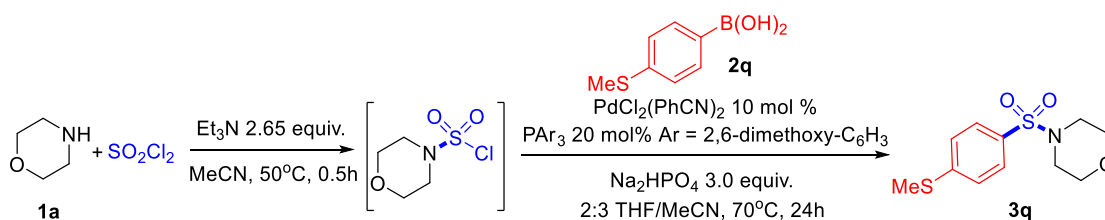

A solution of  $\text{SO}_2\text{Cl}_2$  (10 mmol, 2.5 equiv) in MeCN (20 mL) was cooled to  $0^\circ\text{C}$

before morpholine **1a** (4 mmol, 1.0 equiv) was added dropwisely. Then Et<sub>3</sub>N (10.6 mmol, 2.65 equiv) was added dropwisely and the mixture was heated to 50 °C for 0.5 h. After the scheduled time, the mixture was cooled to -15 °C for Et<sub>3</sub>N-HCl to precipitate. The solution was filtered and transferred to a rubber-septa-sealed flask containing a mixture of (4-(methylthio)phenyl)boronic acid **2q** (8.0 mmol, 2.0 equiv), PdCl<sub>2</sub>(PhCN)<sub>2</sub> (0.4 mmol, 10 mol %), tris(2,6-dimethoxyphenyl)phosphine (0.8 mmol, 20 mol %), and Na<sub>2</sub>HPO<sub>4</sub> (12.0 mmol, 3.0 equiv) in THF (20 mL) under argon. Followed by addition of MeCN (10 mL). The mixture was then stirred at 70 °C for 24 h. After the scheduled time, the solvent was evaporated under reduced pressure and the residue was purified directly by flash column chromatography (eluent: 20% EtOAc/*n*-hexane) to afford the corresponding product **3q** as a white solid (0.674 g, 62% yield).

#### 4.2.2 Procedure using 1% Pd catalyst

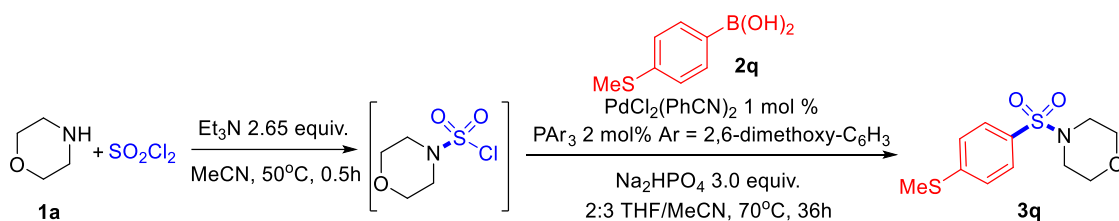

A solution of SO<sub>2</sub>Cl<sub>2</sub> (10 mmol, 2.5 equiv) in MeCN (20 mL) was cooled to 0 °C before morpholine **1a** (4 mmol, 1.0 equiv) was added dropwisely. Then Et<sub>3</sub>N (10.6 mmol, 2.65 equiv) was added dropwisely and the mixture was heated to 50 °C for 0.5 h. After the scheduled time, the mixture was cooled to -15 °C for Et<sub>3</sub>N-HCl to precipitate. The solution was filtered and transferred to a rubber-septa-sealed flask containing a mixture of (4-(methylthio)phenyl)boronic acid **2q** (8.0 mmol, 2.0 equiv), PdCl<sub>2</sub>(PhCN)<sub>2</sub> (0.04 mmol, 1 mol %), tris(2,6-dimethoxyphenyl)phosphine (0.08 mmol, 2 mol %), and Na<sub>2</sub>HPO<sub>4</sub> (12.0 mmol, 3.0 equiv) in THF (20 mL) under argon. Followed by addition of MeCN (10 mL). The mixture was then stirred at 70 °C for 36 h. After the scheduled time, the solvent was evaporated under reduced pressure and the residue was purified directly by flash column chromatography (eluent: 20% EtOAc/*n*-hexane) to afford the corresponding product **3q** as a white solid (0.585 g, 54% yield).



## 5. Characterization data

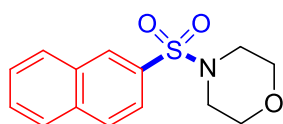

### 4-(Naphthalen-2-ylsulfonyl)morpholine (**3a**)<sup>[1]</sup>

38.1 mg, 69% yield. White solid. M.p. 153.9 – 154.9 °C.

<sup>1</sup>H NMR (400 MHz, CDCl<sub>3</sub>) δ 8.34 (s, 1H), 8.00 (d, *J* = 8.9 Hz, 2H), 7.94 (d, *J* = 7.9 Hz, 1H), 7.75 (dd, *J* = 8.6, 1.8 Hz, 1H), 7.70 – 7.61 (m, 2H), 3.75 (t, *J* = 4.8 Hz, 4H), 3.10 – 3.05 (t, *J* = 4.8 Hz, 4H). <sup>13</sup>C NMR (101 MHz, CDCl<sub>3</sub>) δ 135.14, 132.35, 129.46, 129.39, 129.14, 128.11, 127.83, 123.11, 66.29, 46.23.

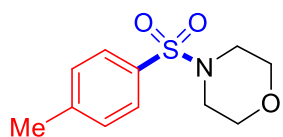

### 4-Tosylmorpholine (**3b**)<sup>[2]</sup>

36.1 mg, 75% yield. White solid. M.p. 139.7 – 140.5 °C.

<sup>1</sup>H NMR (400 MHz, CDCl<sub>3</sub>) δ 7.63 (d, *J* = 8.0 Hz, 2H), 7.34 (d, *J* = 8.0 Hz, 2H), 3.76 – 3.70 (t, *J* = 4.4 Hz, 4H), 3.01 – 2.95 (t, *J* = 4.8 Hz, 4H), 2.44 (s, 3H). <sup>13</sup>C NMR (101 MHz, CDCl<sub>3</sub>) δ 144.07, 132.25, 129.87, 128.03, 66.23, 46.12, 21.66.

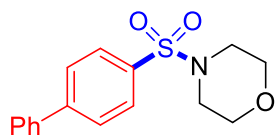

### 4-([1,1'-Biphenyl]-4-ylsulfonyl)morpholine (**3c**)<sup>[1]</sup>

43.7 mg, 72% yield. Off-white solid. M.p. 206.5 – 208.8 °C.

<sup>1</sup>H NMR (400 MHz, CDCl<sub>3</sub>) δ 7.82 (d, *J* = 8.3 Hz, 2H), 7.75 (d, *J* = 8.4 Hz, 2H), 7.61 (d, *J* = 7.4 Hz, 2H), 7.51 – 7.41 (m, 3H), 3.82 – 3.71 (t, *J* = 4.8 Hz, 4H), 3.11 – 3.01 (t, *J* = 4.8 Hz, 4H). <sup>13</sup>C NMR (101 MHz, CDCl<sub>3</sub>) δ 146.19, 139.31, 133.85, 129.24, 128.74, 128.52, 127.89, 127.48, 66.27, 46.16.

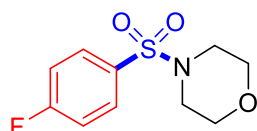

### 4-((4-Fluorophenyl)sulfonyl)morpholine (**3d**)<sup>[1]</sup>

31.2 mg, 64% yield. White solid. M.p. 92.5 – 92.7 °C.

$^1\text{H}$  NMR (400 MHz,  $\text{CDCl}_3$ )  $\delta$  7.81 – 7.74 (m, 2H), 7.28 – 7.20 (m, 2H), 3.76 – 3.73 (t,  $J$  = 4.8 Hz, 4H), 3.01 – 2.98 (t,  $J$  = 4.8 Hz, 4H).  $^{13}\text{C}$  NMR (101 MHz,  $\text{CDCl}_3$ )  $\delta$  165.53 (d,  $J_F$  = 256.6 Hz), 131.47, 130.66 (d,  $J_F$  = 9.4 Hz), 116.58 (d,  $J_F$  = 22.6 Hz), 66.19, 46.10.  $^{19}\text{F}$  NMR (376 MHz,  $\text{CDCl}_3$ )  $\delta$  -104.50.

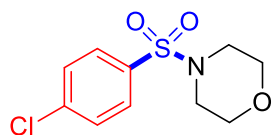

4-((4-Chlorophenyl)sulfonyl)morpholine (**3e**)<sup>[1]</sup>

30.2 mg, 58% yield. White solid. M.p. 145.2 – 146.6 °C.

$^1\text{H}$  NMR (400 MHz,  $\text{CDCl}_3$ )  $\delta$  7.69 (d,  $J$  = 8.6 Hz, 2H), 7.53 (d,  $J$  = 8.6 Hz, 2H), 3.76 – 3.72 (t,  $J$  = 4.8 Hz, 4H), 3.02 – 2.98 (t,  $J$  = 4.8 Hz, 4H).  $^{13}\text{C}$  NMR (101 MHz,  $\text{CDCl}_3$ )  $\delta$  139.89, 133.93, 129.63, 129.37, 66.19, 46.08.

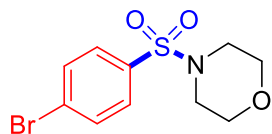

4-((4-Bromophenyl)sulfonyl)morpholine (**3f**)<sup>[3]</sup>

32.4 mg, 53% yield. White solid. M.p. 148.8 – 150.0 °C.

$^1\text{H}$  NMR (400 MHz,  $\text{CDCl}_3$ )  $\delta$  7.72 – 7.68 (m, 2H), 7.64 – 7.59 (m, 2H), 3.74 (t,  $J$  = 4.8 Hz, 4H), 3.00 (t,  $J$  = 4.8 Hz, 4H).  $^{13}\text{C}$  NMR (101 MHz,  $\text{CDCl}_3$ )  $\delta$  134.47, 132.62, 129.44, 128.37, 66.19, 46.07.

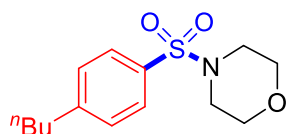

4-((4-Butylphenyl)sulfonyl)morpholine (**3g**)

39.7 mg, 70% yield. White solid. M.p. 86.2 – 87.9 °C.

$^1\text{H}$  NMR (400 MHz,  $\text{CDCl}_3$ )  $\delta$  7.65 (d,  $J$  = 8.3 Hz, 2H), 7.34 (d,  $J$  = 8.2 Hz, 2H), 3.73 (t,  $J$  = 4.8 Hz, 4H), 2.98 (t,  $J$  = 4.8 Hz, 4H), 2.68 (t,  $J$  = 8.0 Hz, 2H), 1.62 (dt,  $J$  = 15.4, 7.6 Hz, 2H), 1.40 – 1.31 (m, 2H), 0.93 (t,  $J$  = 7.3 Hz, 3H). HRMS(ESI) Calc. for  $\text{C}_{14}\text{H}_{22}\text{NO}_3\text{S}^+$  ( $\text{M} + \text{H}^+$ ): 284.1315, found: 284.1318.

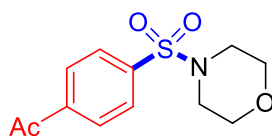

1-(4-(Morpholinosulfonyl)phenyl)ethan-1-one (**3h**)<sup>[4]</sup>

24.2 mg, 45% yield. White solid. M.p. 131.8 – 132.1 °C.

$^1\text{H}$  NMR (400 MHz,  $\text{CDCl}_3$ )  $\delta$  8.10 (d,  $J = 8.6$  Hz, 2H), 7.84 (d,  $J = 8.6$  Hz, 2H), 3.76 – 3.72 (m, 4H), 3.04 – 2.99 (t,  $J = 4.8$  Hz, 4H), 2.66 (s, 3H).  $^{13}\text{C}$  NMR (101 MHz,  $\text{CDCl}_3$ )  $\delta$  196.80, 140.46, 139.34, 129.06, 128.22, 66.18, 46.06, 27.00.

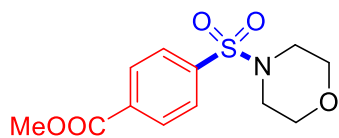

Methyl 4-(morpholinosulfonyl)benzoate (**3i**)<sup>[4]</sup>

22.8 mg, 40% yield. White solid. M.p. 140.2 – 142.3 °C.

$^1\text{H}$  NMR (400 MHz,  $\text{CDCl}_3$ )  $\delta$  8.21 (d,  $J = 8.4$  Hz, 2H), 7.82 (d,  $J = 8.4$  Hz, 2H), 3.97 (s, 3H), 3.76 – 3.72 (m, 4H), 3.05 – 3.00 (m, 4H).  $^{13}\text{C}$  NMR (101 MHz,  $\text{CDCl}_3$ )  $\delta$  165.68, 139.45, 134.40, 130.47, 127.94, 66.21, 52.85, 46.09.

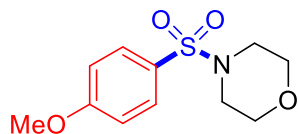

4-((4-Methoxyphenyl)sulfonyl)morpholine (**3j**)<sup>[1]</sup>

38.9 mg, 76% yield. White solid. M.p. 106.5 – 108.7 °C.

$^1\text{H}$  NMR (400 MHz,  $\text{CDCl}_3$ )  $\delta$  7.71 – 7.66 (m, 2H), 7.03 – 6.98 (m, 2H), 3.87 (s, 3H), 3.73 (t,  $J = 4.8$  Hz, 4H), 2.97 (t,  $J = 4.8$  Hz, 4H).  $^{13}\text{C}$  NMR (101 MHz,  $\text{CDCl}_3$ )  $\delta$  163.37, 130.11, 126.83, 114.43, 66.22, 55.77, 46.13.

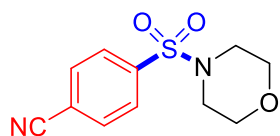

4-(Morpholinosulfonyl)benzotrile (**3k**)<sup>[4]</sup>

16.7 mg, 33% yield. White solid. M.p. 155.7 - 158.1 °C.

$^1\text{H}$  NMR (400 MHz,  $\text{CDCl}_3$ )  $\delta$  7.87 (s, 4H), 3.77 – 3.74 (m, 4H), 3.04 (t,  $J = 4.8$  Hz, 4H).  $^{13}\text{C}$  NMR (101 MHz,  $\text{CDCl}_3$ )  $\delta$  140.04, 133.11, 128.51, 117.26, 117.05, 66.18, 46.04.

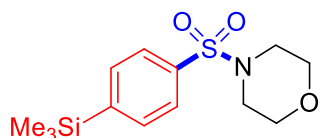

4-((4-(Trimethylsilyl)phenyl)sulfonyl)morpholine (**3l**)<sup>[1]</sup>

36.1 mg, 61% yield. White powder. M.p. 144.9 – 145.8 °C.

$^1\text{H}$  NMR (400 MHz,  $\text{CDCl}_3$ )  $\delta$  7.71 – 7.66 (m, 4H), 3.75 – 3.71 (m, 4H), 3.02 – 2.98 (m, 4H), 0.30 (s, 9H).  $^{13}\text{C}$  NMR (101 MHz,  $\text{CDCl}_3$ )  $\delta$  147.61, 135.26, 134.03, 126.83, 66.22, 46.08, -1.27.

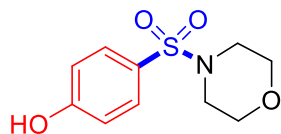

4-(Morpholinosulfonyl)phenol (**3m**)<sup>[4]</sup>

32.9 mg, 68% yield. White solid. M.p. 144.1 – 147.3 °C.

$^1\text{H}$  NMR (400 MHz,  $\text{CD}_3\text{CN}$ )  $\delta$  7.86 (broad, 1H), 7.62 – 7.57 (m, 2H), 7.00 – 6.97 (m, 2H), 3.65 (t,  $J = 4.8$  Hz, 4H), 2.87 (t,  $J = 4.8$  Hz, 4H).  $^{13}\text{C}$  NMR (101 MHz,  $\text{CD}_3\text{CN}$ )  $\delta$  162.18, 131.21, 118.31, 116.67, 66.70, 47.13.

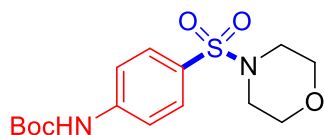

*tert*-Butyl (4-(morpholinosulfonyl)phenyl)carbamate (**3n**)<sup>[5]</sup>

47.3 mg, 73% yield. White solid. M.p. 162.7 – 163.9 °C.

$^1\text{H}$  NMR (400 MHz,  $\text{CDCl}_3$ )  $\delta$  7.66 (d,  $J = 8.7$  Hz, 2H), 7.54 (d,  $J = 8.8$  Hz, 2H), 6.88 (d,  $J = 13.6$  Hz, 1H), 3.74 – 3.70 (m, 4H), 2.99 – 2.94 (m, 4H), 1.52 (s, 9H).  $^{13}\text{C}$  NMR (101 MHz,  $\text{CDCl}_3$ )  $\delta$  152.25, 143.16, 129.33, 128.58, 118.03, 81.78, 66.21, 46.12, 28.36.

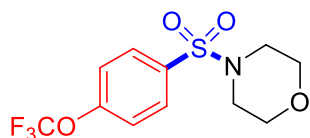

4-((4-(Trifluoromethoxy)phenyl)sulfonyl)morpholine (**3o**)<sup>[1]</sup>

36.2 mg, 59% yield. Colorless oil.

$^1\text{H}$  NMR (400 MHz,  $\text{CDCl}_3$ )  $\delta$  7.83 – 7.79 (m, 2H), 7.38 (d,  $J = 8.1$  Hz, 2H), 3.77 – 3.73 (t,  $J = 4.8$  Hz, 4H), 3.03 – 2.99 (t,  $J = 4.8$  Hz, 4H).  $^{13}\text{C}$  NMR (101 MHz,  $\text{CDCl}_3$ )  $\delta$  152.62, 133.83, 130.09, 121.10, 120.36 (q,  $J_F = 260.7$  Hz), 66.18, 46.07.  $^{19}\text{F}$  NMR (376 MHz,  $\text{CDCl}_3$ )  $\delta$  -57.72.

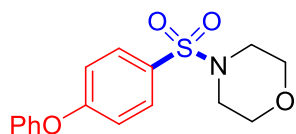

4-((4-Phenoxyphenyl)sulfonyl)morpholine (**3p**)

38.4 mg, 61% yield. White solid. M.p. 149.4 – 150.6 °C.

$^1\text{H}$  NMR (400 MHz,  $\text{CDCl}_3$ )  $\delta$  7.72 – 7.67 (m, 2H), 7.42 (t,  $J = 7.9$  Hz, 2H), 7.23 (t,  $J = 7.5$  Hz, 1H), 7.10 – 7.04 (m, 4H), 3.77 – 3.73 (m, 4H), 3.02 – 2.98 (m, 4H).  $^{13}\text{C}$  NMR (101 MHz,  $\text{CDCl}_3$ )  $\delta$  162.14, 155.12, 130.37, 130.20, 128.67, 125.23, 120.53, 117.66, 66.23, 46.13. HRMS(ESI) Calc. for  $\text{C}_{16}\text{H}_{18}\text{NO}_4\text{S}^+(\text{M} + \text{H}^+)$ : 320.0951, found: 320.0952.

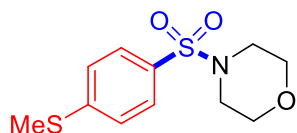

4-((4-(Methylthio)phenyl)sulfonyl)morpholine (**3q**)<sup>[1]</sup>

40.4 mg, 74% yield. White solid. M.p. 133.4 – 134.3 °C.

$^1\text{H}$  NMR (400 MHz,  $\text{CDCl}_3$ )  $\delta$  7.63 (d,  $J = 8.5$  Hz, 2H), 7.33 (d,  $J = 8.5$  Hz, 2H), 3.73 (t,  $J = 4.8$  Hz, 4H), 3.00 – 2.95 (m, 4H), 2.52 (s, 3H).  $^{13}\text{C}$  NMR (101 MHz,  $\text{CDCl}_3$ )  $\delta$  146.44, 130.92, 128.25, 125.52, 66.20, 46.10, 14.90.

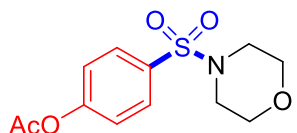

4-(Morpholinosulfonyl)phenyl acetate (**3r**)

31.9 mg, 56% yield. White solid. M.p. 107.0 – 109.1 °C.

$^1\text{H}$  NMR (400 MHz,  $\text{CDCl}_3$ )  $\delta$  7.78 (d,  $J = 8.7$  Hz, 2H), 7.30 (d,  $J = 8.7$  Hz, 2H), 3.74 (t,  $J = 4.8$  Hz, 4H), 3.06 – 2.99 (m, 4H), 2.34 (s, 3H).  $^{13}\text{C}$  NMR (101 MHz,  $\text{CDCl}_3$ )  $\delta$  168.67, 154.34, 132.63, 129.57, 122.53, 66.21, 46.08, 21.27. HRMS(ESI) Calc. for  $\text{C}_{12}\text{H}_{16}\text{NO}_5\text{S}^+(\text{M} + \text{H}^+)$ : 286.0744, found: 286.0742.

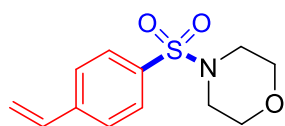

4-((4-Vinylphenyl)sulfonyl)morpholine (**3s**)

15.3 mg, 30% yield. Off-white solid. M.p. 125.5 – 128.5 °C.

$^1\text{H}$  NMR (400 MHz,  $\text{CDCl}_3$ )  $\delta$  7.71 (d,  $J = 8.4$  Hz, 2H), 7.56 (d,  $J = 8.4$  Hz, 2H), 6.76 (dd,  $J = 17.6, 10.9$  Hz, 1H), 5.90 (d,  $J = 17.6$  Hz, 1H), 5.46 (d,  $J = 10.9$  Hz, 1H), 3.74 (t,  $J = 4.8$  Hz, 4H), 3.00 (t,  $J = 4.8$  Hz, 4H).  $^{13}\text{C}$  NMR (101 MHz,  $\text{CDCl}_3$ )  $\delta$  142.39, 135.38, 128.34, 126.88, 117.85, 66.24, 46.12. HRMS(ESI) Calc. for  $\text{C}_{12}\text{H}_{15}\text{NNaO}_3\text{S}^+(\text{M} + \text{Na}^+)$ : 276.0665, found: 276.0668.

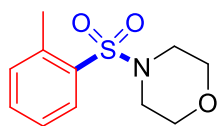

4-(*o*-Tolylsulfonyl)morpholine (**3t**)<sup>[1]</sup>

31.5 mg, 66% yield. White solid. M.p. 127.0 – 127.4 °C.

<sup>1</sup>H NMR (400 MHz, CDCl<sub>3</sub>) δ 7.89 (dd, *J* = 8.2, 1.1 Hz, 1H), 7.48 (td, *J* = 7.5, 1.2 Hz, 1H), 7.35 – 7.31 (m, 2H), 3.72 (t, *J* = 4.8 Hz, 4H), 3.15 (t, *J* = 4.8 Hz, 4H), 2.64 (s, 3H). <sup>13</sup>C NMR (101 MHz, CDCl<sub>3</sub>) δ 138.31, 135.17, 133.22, 133.06, 130.58, 126.31, 66.47, 45.46, 20.97.

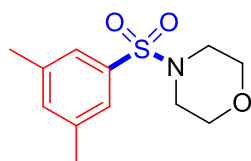

4-((3,5-Dimethylphenyl)sulfonyl)morpholine (**3u**)<sup>[6]</sup>

36.0 mg, 71% yield. White solid. M.p. 149.2 – 151.4 °C.

<sup>1</sup>H NMR (400 MHz, CDCl<sub>3</sub>) δ 7.35 (s, 2H), 7.23 (s, 1H), 3.75 – 3.72 (t, *J* = 4.8 Hz, 4H), 3.01 – 2.97 (t, *J* = 4.8 Hz, 4H), 2.39 (s, 6H). <sup>13</sup>C NMR (101 MHz, CDCl<sub>3</sub>) δ 139.30, 134.92, 125.51, 66.27, 46.17, 21.40.

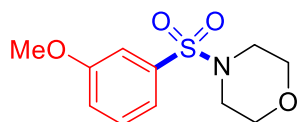

4-((3-Methoxyphenyl)sulfonyl)morpholine (**3v**)<sup>[1]</sup>

37.7 mg, 74% yield. White solid. M.p. 125.9 – 127.3 °C.

<sup>1</sup>H NMR (400 MHz, CDCl<sub>3</sub>) δ 7.45 (t, *J* = 8.0 Hz, 1H), 7.32 (d, *J* = 7.8 Hz, 1H), 7.26 – 7.23 (m, 1H), 7.14 (dd, *J* = 8.2, 2.3 Hz, 1H), 3.86 (s, 3H), 3.74 (t, *J* = 4.8 Hz, 4H), 3.01 (t, *J* = 4.8 Hz, 4H). <sup>13</sup>C NMR (101 MHz, CDCl<sub>3</sub>) δ 160.12, 136.46, 130.33, 120.08, 119.24, 112.93, 66.25, 55.82, 46.15.

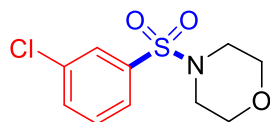

4-((3-Chlorophenyl)sulfonyl)morpholine (**3w**)<sup>[1]</sup>

34.3 mg, 66% yield. White solid. M.p. 144.2 – 145.2 °C.

$^1\text{H}$  NMR (400 MHz,  $\text{CDCl}_3$ )  $\delta$  7.75 (t,  $J = 1.8$  Hz, 1H), 7.65 – 7.59 (m, 2H), 7.50 (t,  $J = 7.9$  Hz, 1H), 3.75 (t,  $J = 4.8$  Hz, 4H), 3.02 (t,  $J = 4.8$  Hz, 4H).  $^{13}\text{C}$  NMR (101 MHz,  $\text{CDCl}_3$ )  $\delta$  137.23, 135.68, 133.36, 130.59, 127.93, 126.03, 66.20, 46.11.

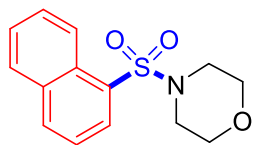

4-(Naphthalen-1-ylsulfonyl)morpholine (**3x**)<sup>[1]</sup>

36.1 mg, 65% yield. White solid. M.p. 105.3 – 105.9 °C.

$^1\text{H}$  NMR (400 MHz,  $\text{CDCl}_3$ )  $\delta$  8.77 (d,  $J = 8.7$  Hz, 1H), 8.21 (dd,  $J = 7.4, 1.1$  Hz, 1H), 8.09 (d,  $J = 8.2$  Hz, 1H), 7.94 (d,  $J = 7.6$  Hz, 1H), 7.68 – 7.54 (m, 3H), 3.68 (t,  $J = 4.8$  Hz, 4H), 3.16 (t,  $J = 4.8$  Hz, 4H).  $^{13}\text{C}$  NMR (101 MHz,  $\text{CDCl}_3$ )  $\delta$  134.86, 134.52, 132.10, 130.96, 129.21, 129.10, 128.30, 127.08, 125.25, 124.25, 66.39, 45.75.

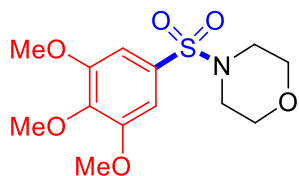

4-((3,4,5-Trimethoxyphenyl)sulfonyl)morpholine (**3y**)<sup>[1]</sup>

29.2 mg, 46% yield. White solid. M.p. 109.2 – 110.0 °C.

$^1\text{H}$  NMR (400 MHz,  $\text{CDCl}_3$ )  $\delta$  6.94 (s, 2H), 3.90 (s, 9H), 3.74 (t,  $J = 4.8$  Hz, 4H), 3.04 – 2.98 (m, 4H).  $^{13}\text{C}$  NMR (101 MHz,  $\text{CDCl}_3$ )  $\delta$  153.52, 142.06, 129.97, 105.26, 66.22, 61.07, 56.62, 46.10.

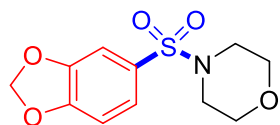

4-(Benzo[d][1,3]dioxol-5-ylsulfonyl)morpholine (**3z**)<sup>[1]</sup>

32.6 mg, 60% yield. White solid. M.p. 144.5 – 146.5 °C.

$^1\text{H}$  NMR (400 MHz,  $\text{CDCl}_3$ )  $\delta$  7.30 (dd,  $J = 8.2, 1.8$  Hz, 1H), 7.15 (d,  $J = 1.8$  Hz, 1H), 6.91 (d,  $J = 8.2$  Hz, 1H), 6.09 (s, 2H), 3.73 (t,  $J = 4.8$  Hz, 4H), 3.00 – 2.97 (m, 4H).  $^{13}\text{C}$  NMR (101 MHz,  $\text{CDCl}_3$ )  $\delta$  151.81, 148.41, 128.50, 123.67, 108.49, 108.10, 102.51, 66.20, 46.14.

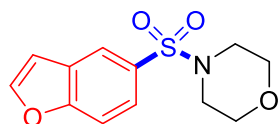

4-(Benzofuran-5-ylsulfonyl)morpholine (**3aa**)<sup>[1]</sup>

37.6 mg, 71% yield. White solid. M.p. 125.5 – 128.0 °C.

<sup>1</sup>H NMR (400 MHz, CDCl<sub>3</sub>) δ 8.06 (d, *J* = 1.2 Hz, 1H), 7.77 (d, *J* = 2.1 Hz, 1H), 7.70 (dd, *J* = 8.7, 1.5 Hz, 1H), 7.64 (d, *J* = 8.7 Hz, 1H), 6.89 (d, *J* = 1.6 Hz, 1H), 3.73 (t, *J* = 4.8 Hz, 4H), 3.03 – 2.98 (m, 4H). <sup>13</sup>C NMR (101 MHz, CDCl<sub>3</sub>) δ 157.04, 147.41, 129.95, 128.09, 124.09, 122.22, 112.21, 107.21, 66.21, 46.20.

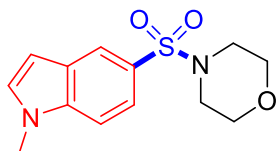

4-((1-Methyl-1*H*-indol-5-yl)sulfonyl)morpholine (**3ab**)<sup>[1]</sup>

39.8 mg, 71% yield. White solid. M.p. 171.4 – 175.5 °C.

<sup>1</sup>H NMR (400 MHz, CDCl<sub>3</sub>) δ 8.08 (d, *J* = 1.3 Hz, 1H), 7.58 (dd, *J* = 8.7, 1.6 Hz, 1H), 7.42 (d, *J* = 8.7 Hz, 1H), 7.20 (d, *J* = 3.1 Hz, 1H), 6.63 (d, *J* = 2.8 Hz, 1H), 3.86 (s, 3H), 3.73 (t, *J* = 4.8 Hz, 4H), 3.02 – 2.97 (m, 4H). <sup>13</sup>C NMR (101 MHz, CDCl<sub>3</sub>) δ 138.68, 131.38, 128.10, 125.60, 122.34, 120.87, 109.66, 102.87, 66.29, 46.30, 33.30.

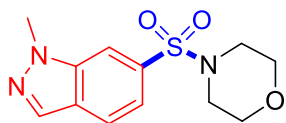

4-((1-Methyl-1*H*-indazol-6-yl)sulfonyl)morpholine (**3ac**)

41.6 mg, 74% yield. White solid. M.p. 156.7 – 160.0 °C.

<sup>1</sup>H NMR (400 MHz, CDCl<sub>3</sub>) δ 8.09 (s, 1H), 7.90 – 7.86 (m, 2H), 7.47 (d, *J* = 8.3 Hz, 1H), 4.16 (s, 3H), 3.78 – 3.70 (m, 4H), 3.05 (broad, 4H). <sup>13</sup>C NMR (101 MHz, CDCl<sub>3</sub>) δ 138.96, 133.36, 133.21, 126.35, 122.26, 118.85, 110.09, 66.25, 46.20, 36.15. HRMS(ESI) Calc. for C<sub>12</sub>H<sub>16</sub>N<sub>3</sub>O<sub>3</sub>S<sup>+</sup> (M + H<sup>+</sup>): 282.0907, found: 282.0911.

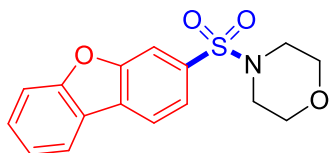

4-(Dibenzo[*b,d*]furan-3-ylsulfonyl)morpholine (**3ad**)<sup>[7]</sup>

28.6 mg, 45% yield. White solid. M.p. 208.7 – 211.3 °C.

<sup>1</sup>H NMR (400 MHz, CDCl<sub>3</sub>) δ 8.11 (d, *J* = 8.1 Hz, 1H), 8.03 (d, *J* = 7.7 Hz, 1H), 7.99 (d, *J* = 1.3 Hz, 1H), 7.75 (dd, *J* = 8.1, 1.4 Hz, 1H), 7.65 (d, *J* = 8.3 Hz, 1H), 7.61 – 7.56 (m, 1H), 7.43 (t, *J* = 7.5 Hz, 1H), 3.76 (t, *J* = 4.8 Hz, 4H), 3.06 (t, *J* = 4.8 Hz, 4H). <sup>13</sup>C NMR (101



MHz, CDCl<sub>3</sub>)  $\delta$  158.51, 152.41, 133.73, 129.32, 123.76, 122.37, 121.67, 121.24, 112.35, 111.92, 66.28, 46.27.

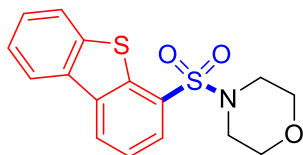

4-(Dibenzo[*b,d*]thiophen-4-ylsulfonyl)morpholine (**3ae**)

44.0 mg, 66% yield. White solid. M.p. 149.2 – 150.4 °C.

<sup>1</sup>H NMR (400 MHz, CDCl<sub>3</sub>)  $\delta$  8.38 (dd, *J* = 7.9, 0.9 Hz, 1H), 8.21 – 8.16 (m, 1H), 7.88 (dd, *J* = 6.4, 1.3 Hz, 2H), 7.61 (t, *J* = 7.7 Hz, 1H), 7.56 – 7.49 (m, 2H), 3.71 (t, *J* = 4.8 Hz, 4H), 3.16 (t, *J* = 4.8 Hz, 4H). <sup>13</sup>C NMR (101 MHz, CDCl<sub>3</sub>)  $\delta$  140.32, 138.32, 138.15, 134.05, 130.36, 128.02, 127.65, 125.98, 125.08, 124.65, 122.61, 121.92, 66.21, 46.23. HRMS(ESI) Calc. for C<sub>16</sub>H<sub>16</sub>NO<sub>3</sub>S<sub>2</sub><sup>+</sup> (M + H<sup>+</sup>): 334.0566, found: 334.0566.

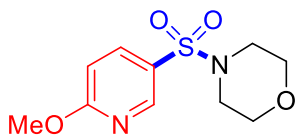

4-((6-Methoxypyridin-3-yl)sulfonyl)morpholine (**3af**)<sup>[1]</sup>

30.2 mg, 58% yield. White solid. M.p. 156.0 – 157.5 °C.

<sup>1</sup>H NMR (400 MHz, CDCl<sub>3</sub>)  $\delta$  8.56 (d, *J* = 2.2 Hz, 1H), 7.86 (dd, *J* = 8.8, 2.5 Hz, 1H), 6.86 (d, *J* = 8.7 Hz, 1H), 4.01 (s, 3H), 3.78 – 3.73 (m, 4H), 3.01 (t, *J* = 4.8 Hz, 4H). <sup>13</sup>C NMR (101 MHz, CDCl<sub>3</sub>)  $\delta$  166.84, 148.13, 137.93, 124.67, 111.60, 66.13, 54.47, 45.99.

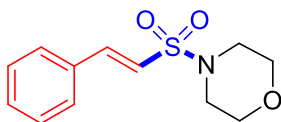

(*E*)-4-(Styrylsulfonyl)morpholine (**3ag**)<sup>[8]</sup>

21.3 mg, 42% yield. Yellow solid. M.p. 158.8 – 160.8 °C.

<sup>1</sup>H NMR (400 MHz, CDCl<sub>3</sub>)  $\delta$  7.51 (dd, *J* = 4.9, 1.8 Hz, 2H), 7.48 (d, *J* = 11.0 Hz, 1H), 7.45 – 7.40 (m, 3H), 6.67 (d, *J* = 15.5 Hz, 1H), 3.80 – 3.76 (m, 4H), 3.19 (t, *J* = 4.8 Hz, 4H). <sup>13</sup>C NMR (101 MHz, CDCl<sub>3</sub>)  $\delta$  144.40, 132.54, 131.28, 129.29, 128.45, 120.69, 66.42, 45.85.

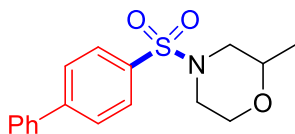

4-([1,1'-Biphenyl]-4-ylsulfonyl)-2-methylmorpholine (**3ah**)

25.6 mg, 41% yield. White crystalline solid. M.p. 179.6 – 182.6 °C.

$^1\text{H}$  NMR (400 MHz,  $\text{CDCl}_3$ )  $\delta$  7.82 (d,  $J = 8.5$  Hz, 2H), 7.75 (d,  $J = 8.5$  Hz, 2H), 7.61 (d,  $J = 7.1$  Hz, 2H), 7.49 (t,  $J = 7.3$  Hz, 2H), 7.43 (t,  $J = 7.3$  Hz, 1H), 3.91 (dd,  $J = 11.7, 2.1$  Hz, 1H), 3.74 – 3.65 (m, 2H), 3.59 (t,  $J = 12.1$  Hz, 2H), 2.45 (td,  $J = 11.5, 3.3$  Hz, 1H), 2.10 (t,  $J = 10.6$  Hz, 1H), 1.15 (d,  $J = 6.3$  Hz, 3H). HRMS(ESI) Calc. for  $\text{C}_{17}\text{H}_{20}\text{NO}_3\text{S}^+$  ( $\text{M} + \text{H}^+$ ): 318.1158, found: 318.1162.

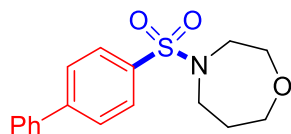

4-([1,1'-Biphenyl]-4-ylsulfonyl)-1,4-oxazepane (**3ai**)

39.9 mg, 63% yield. White crystalline solid. M.p. 127.8 – 130.1 °C.

$^1\text{H}$  NMR (400 MHz,  $\text{CDCl}_3$ )  $\delta$  7.85 (d,  $J = 8.3$  Hz, 2H), 7.72 (d,  $J = 8.3$  Hz, 2H), 7.60 (d,  $J = 7.2$  Hz, 2H), 7.48 (t,  $J = 7.4$  Hz, 2H), 7.42 (t,  $J = 7.2$  Hz, 1H), 3.85 – 3.74 (m, 4H), 3.48 – 3.37 (m, 4H), 2.02 – 1.93 (m, 2H).  $^{13}\text{C}$  NMR (101 MHz,  $\text{CDCl}_3$ )  $\delta$  145.64, 139.41, 137.69, 129.20, 128.62, 127.90, 127.63, 127.44, 71.30, 69.63, 51.57, 47.04, 30.49. HRMS(ESI) Calc. for  $\text{C}_{17}\text{H}_{20}\text{NO}_3\text{S}^+$  ( $\text{M} + \text{H}^+$ ): 318.1158, found: 318.1158.

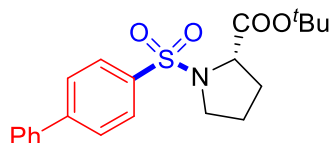

*tert*-Butyl ([1,1'-biphenyl]-4-ylsulfonyl)-*L*-prolinate (**3aj**)

54.8 mg, 71% yield. Off-white solid. M.p. 83.0 – 85.0 °C.

$^1\text{H}$  NMR (400 MHz,  $\text{CDCl}_3$ )  $\delta$  7.94 (d,  $J = 8.4$  Hz, 2H), 7.71 (d,  $J = 8.4$  Hz, 2H), 7.60 (d,  $J = 7.2$  Hz, 2H), 7.47 (t,  $J = 7.4$  Hz, 2H), 7.41 (t,  $J = 7.3$  Hz, 1H), 4.25 (dd,  $J = 8.3, 3.4$  Hz, 1H), 3.53 – 3.48 (m, 1H), 3.42 – 3.34 (m, 1H), 2.08 – 1.95 (m, 3H), 1.84 – 1.77 (m, 1H), 1.45 (s, 9H).  $^{13}\text{C}$  NMR (101 MHz,  $\text{CDCl}_3$ )  $\delta$  171.40, 145.65, 139.54, 137.56, 129.15, 128.53, 128.11, 127.71, 127.44, 81.81, 61.33, 48.48, 31.15, 28.04, 24.72. HRMS(ESI) Calc. for  $\text{C}_{21}\text{H}_{26}\text{NO}_4\text{S}^+$  ( $\text{M} + \text{H}^+$ ): 388.1577, found: 388.1572.

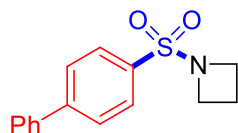

1-([1,1'-Biphenyl]-4-ylsulfonyl)azetidine (**3ak**)

26.8 mg, 49% yield. White solid. M.p. 115.8 – 118.0 °C.

$^1\text{H}$  NMR (400 MHz,  $\text{CDCl}_3$ )  $\delta$  7.91 (d,  $J = 8.5$  Hz, 2H), 7.78 (d,  $J = 8.5$  Hz, 2H), 7.66 – 7.61 (m, 2H), 7.50 (t,  $J = 7.3$  Hz, 2H), 7.43 (t,  $J = 7.3$  Hz, 1H), 3.83 (t,  $J = 7.6$  Hz, 4H), 2.12 (dd,  $J = 15.3, 7.6$  Hz, 2H).  $^{13}\text{C}$  NMR (101 MHz,  $\text{CDCl}_3$ )  $\delta$  146.14, 139.43, 133.55, 129.24, 129.01, 128.72, 127.84, 127.50, 51.10, 15.48. HRMS(ESI) Calc. for  $\text{C}_{15}\text{H}_{16}\text{NO}_2\text{S}^+$  ( $\text{M} + \text{H}^+$ ): 274.0896, found: 274.0898.

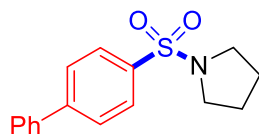

1-([1,1'-Biphenyl]-4-ylsulfonyl)pyrrolidine (**3al**)

26.9 mg, 47% yield. White solid. M.p. 130.5 – 133.0 °C.

$^1\text{H}$  NMR (400 MHz,  $\text{CDCl}_3$ )  $\delta$  7.92 (d,  $J = 8.4$  Hz, 2H), 7.76 (d,  $J = 8.4$  Hz, 2H), 7.64 (d,  $J = 7.2$  Hz, 2H), 7.51 (t,  $J = 7.4$  Hz, 2H), 7.44 (t,  $J = 7.3$  Hz, 1H), 3.32 (t,  $J = 6.7$  Hz, 4H), 1.85 – 1.78 (m, 4H).  $^{13}\text{C}$  NMR (101 MHz,  $\text{CDCl}_3$ )  $\delta$  145.59, 139.52, 135.85, 129.20, 128.59, 128.18, 127.75, 127.45, 48.10, 25.41. HRMSESI) Calc. for  $\text{C}_{16}\text{H}_{18}\text{NO}_2\text{S}^+$  ( $\text{M} + \text{H}^+$ ): 288.1053, found: 288.1062.

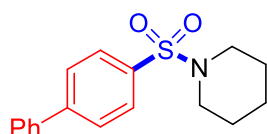

1-([1,1'-Biphenyl]-4-ylsulfonyl)piperidine (**3am**)

25.4 mg, 42% yield. White solid. M.p. 176.9 – 178.0 °C.

$^1\text{H}$  NMR (400 MHz,  $\text{CDCl}_3$ )  $\delta$  7.82 (d,  $J = 8.4$  Hz, 2H), 7.73 (d,  $J = 8.4$  Hz, 2H), 7.63 – 7.59 (m, 2H), 7.48 (t,  $J = 7.4$  Hz, 2H), 7.42 (t,  $J = 7.3$  Hz, 1H), 3.07 – 3.01 (m, 4H), 1.67 (dt,  $J = 11.3, 5.8$  Hz, 4H), 1.44 (t,  $J = 5.9$  Hz, 2H).  $^{13}\text{C}$  NMR (101 MHz,  $\text{CDCl}_3$ )  $\delta$  145.59, 139.51, 135.21, 129.20, 128.60, 128.34, 127.68, 127.46, 47.11, 25.36, 23.68. HRMS(ESI) Calc. for  $\text{C}_{17}\text{H}_{20}\text{NO}_2\text{S}^+$  ( $\text{M} + \text{H}^+$ ): 302.1209, found: 302.1208.

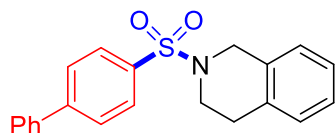

2-([1,1'-Biphenyl]-4-ylsulfonyl)-1,2,3,4-tetrahydroisoquinoline (**3an**)

36.9 mg, 53% yield. Off-white solid. M.p. 133.9 – 135.6 °C.

$^1\text{H}$  NMR (400 MHz,  $\text{CDCl}_3$ )  $\delta$  7.91 (d,  $J = 8.5$  Hz, 2H), 7.73 (d,  $J = 8.5$  Hz, 2H), 7.59 (d,  $J = 7.1$  Hz, 2H), 7.48 (t,  $J = 7.3$  Hz, 2H), 7.42 (t,  $J = 7.3$  Hz, 1H), 7.17 – 7.12 (m, 2H), 7.11 –

7.03 (m, 2H), 4.33 (s, 2H), 3.43 (t,  $J = 5.9$  Hz, 2H), 2.95 (t,  $J = 5.9$  Hz, 2H).  $^{13}\text{C}$  NMR (101 MHz,  $\text{CDCl}_3$ )  $\delta$  145.92, 139.40, 135.20, 133.21, 131.73, 129.20, 128.97, 128.65, 128.34, 127.83, 127.45, 126.92, 126.51, 47.69, 43.89, 28.99. HRMS(ESI) Calc. for  $\text{C}_{21}\text{H}_{20}\text{NO}_2\text{S}^+$  ( $\text{M} + \text{H}^+$ ): 350.1209, found: 350.1209.

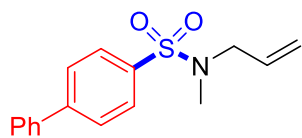

*N*-Allyl-*N*-methyl-[1,1'-biphenyl]-4-sulfonamide (**3ao**)

21.2 mg, 37% yield. White solid. M.p. 86.8 – 88.4 °C.

$^1\text{H}$  NMR (400 MHz,  $\text{CDCl}_3$ )  $\delta$  7.88 (d,  $J = 8.5$  Hz, 2H), 7.77 (d,  $J = 8.5$  Hz, 2H), 7.62 (d,  $J = 7.0$  Hz, 2H), 7.50 (t,  $J = 7.3$  Hz, 2H), 7.47 – 7.41 (m, 1H), 4.42 (tt,  $J = 6.6, 4.8$  Hz, 1H), 3.93 (qd,  $J = 12.1, 4.8$  Hz, 2H), 3.52 (dd,  $J = 14.6, 7.2$  Hz, 1H), 3.28 (dd,  $J = 14.6, 6.4$  Hz, 1H), 2.94 (s, 3H).  $^{13}\text{C}$  NMR (101 MHz,  $\text{CDCl}_3$ )  $\delta$  146.21, 139.25, 135.40, 129.25, 128.77, 128.13, 128.06, 127.47, 58.71, 54.22, 46.63, 37.80. HRMS(EI) Calc. for  $\text{C}_{16}\text{H}_{17}\text{NO}_2\text{S}^+$  ( $\text{M}^+$ ): 287.0975, found: 287.0986.

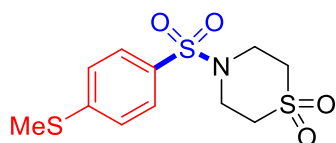

4-((4-(Methylthio)phenyl)sulfonyl)thiomorpholine 1,1-dioxide (**3ap**)

29.5 mg, 46% yield. White solid.

$^1\text{H}$  NMR (400 MHz,  $\text{CDCl}_3$ )  $\delta$  7.65 (d,  $J = 8.6$  Hz, 2H), 7.34 (d,  $J = 8.6$  Hz, 2H), 3.65 (broad, 4H), 3.17 – 3.11 (m, 4H), 2.54 (s, 3H).  $^{13}\text{C}$  NMR (101 MHz,  $\text{CDCl}_3$ )  $\delta$  147.51, 132.31, 127.67, 125.84, 51.50, 44.96, 14.88. HRMS(ESI) Calc. for  $\text{C}_{11}\text{H}_{15}\text{NNaO}_4\text{S}_3^+$  ( $\text{M} + \text{Na}^+$ ): 344.0055, found: 344.0060.

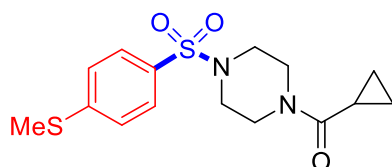

Cyclopropyl(4-((4-(methylthio)phenyl)sulfonyl)piperazin-1-yl)methanone (**3aq**)

35.3 mg, 52% yield. White solid. M.p. 78 – 80 °C. (Measured manually)

$^1\text{H}$  NMR (400 MHz,  $\text{CDCl}_3$ )  $\delta$  7.62 (d,  $J = 8.6$  Hz, 2H), 7.32 (d,  $J = 8.6$  Hz, 2H), 3.74 (broad, 4H), 3.01 (broad, 4H), 2.53 (s, 3H), 1.66 – 1.59 (m, 1H), 0.96 – 0.90 (m, 2H), 0.77 – 0.70 (m, 2H).  $^{13}\text{C}$  NMR (101 MHz,  $\text{CDCl}_3$ )  $\delta$  172.13, 146.66, 131.08, 128.14, 125.59, 46.36,

46.08, 45.05, 41.52, 14.90, 11.02, 7.82. HRMS(ESI) Calc. for  $C_{15}H_{21}N_2O_3S_2^+$  ( $M + H^+$ ): 341.0988, found: 341.0966.

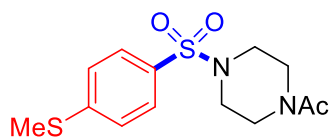

1-((4-(4-(Methylthio)phenyl)sulfonyl)piperazin-1-yl)ethan-1-one (**3ar**)

39.6 mg, 63% yield. Yellow solid.

$^1H$  NMR (400 MHz,  $CDCl_3$ )  $\delta$  7.59 (d,  $J = 8.4$  Hz, 2H), 7.30 (d,  $J = 8.4$  Hz, 2H), 3.66 (t,  $J = 4.8$  Hz, 2H), 3.52 (t,  $J = 4.8$  Hz, 2H), 3.01 – 2.92 (m, 4H), 2.50 (s, 3H), 2.01 (s, 3H).  $^{13}C$  NMR (101 MHz,  $CDCl_3$ )  $\delta$  168.91, 146.69, 130.78, 128.05, 125.50, 46.16, 45.87, 45.71, 40.73, 21.30, 14.81. HRMS(ESI) Calc. for  $C_{13}H_{18}N_2O_3S_2^+$  ( $M + H^+$ ): 315.0832, found: 315.0832.

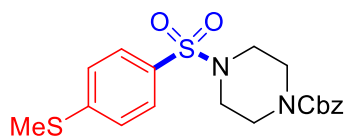

Benzyl 4-((4-(methylthio)phenyl)sulfonyl)piperazine-1-carboxylate (**3as**)

44.7 mg, 55% yield. White solid. M.p. 126.3 – 126.9 °C.

$^1H$  NMR (400 MHz,  $CDCl_3$ )  $\delta$  7.61 (d,  $J = 8.6$  Hz, 2H), 7.37 – 7.27 (m, 7H), 5.07 (s, 2H), 3.58 (t,  $J = 5.2$  Hz, 1H), 2.97 (broad, 4H), 2.52 (s, 3H).  $^{13}C$  NMR (101 MHz,  $CDCl_3$ )  $\delta$  154.89, 146.56, 136.29, 131.08, 128.66, 128.35, 128.17, 128.12, 125.54, 67.64, 45.91, 43.31, 14.87. HRMS(ESI) Calc. for  $C_{19}H_{22}N_2NaO_4S_2^+$  ( $M + Na^+$ ): 429.0913, found: 429.0921.

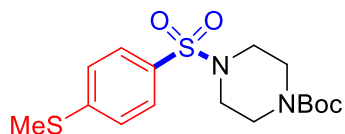

*tert*-Butyl 4-((4-(methylthio)phenyl)sulfonyl)piperazine-1-carboxylate (**3at**)

39.4 mg, 53% yield. White crystalline solid. M.p. 158.9 – 159.6 °C.

$^1H$  NMR (400 MHz,  $CDCl_3$ )  $\delta$  7.62 (d,  $J = 8.5$  Hz, 2H), 7.31 (d,  $J = 8.5$  Hz, 2H), 3.51 – 3.46 (m, 4H), 3.01 – 2.91 (m, 4H), 2.52 (s, 3H), 1.40 (s, 9H).  $^{13}C$  NMR (101 MHz,  $CDCl_3$ )  $\delta$  154.27, 146.43, 131.35, 128.16, 125.56, 80.52, 46.00, 43.25, 28.44, 14.90. HRMS(ESI) Calc. for  $C_{16}H_{24}N_2NaO_4S_2^+$  ( $M + Na^+$ ): 395.1070, found: 395.1084.

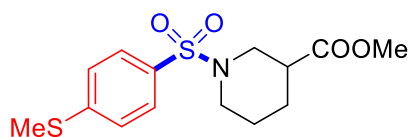

Methyl 1-((4-(methylthio)phenyl)sulfonyl)piperidine-3-carboxylate (**3au**)

35.5 mg, 54% yield. Light yellow oil.

$^1\text{H}$  NMR (400 MHz,  $\text{CDCl}_3$ )  $\delta$  7.64 (d,  $J = 8.5$  Hz, 2H), 7.31 (d,  $J = 8.5$  Hz, 2H), 3.82 (d,  $J = 11.5$  Hz, 1H), 3.67 (s, 3H), 3.60 (d,  $J = 11.5$  Hz, 1H), 2.62 (tt,  $J = 10.8, 3.7$  Hz, 1H), 2.52 (s, 3H), 2.47 (d,  $J = 10.7$  Hz, 1H), 2.33 (td,  $J = 11.4, 2.7$  Hz, 1H), 1.98 (dd,  $J = 13.2, 3.4$  Hz, 1H), 1.81 – 1.75 (m, 1H), 1.70 – 1.55 (m, 2H), 1.42 – 1.32 (m, 2H).  $^{13}\text{C}$  NMR (101 MHz,  $\text{CDCl}_3$ )  $\delta$  173.24, 146.01, 131.85, 128.03, 125.46, 52.06, 47.80, 46.37, 41.09, 29.81, 26.57, 24.08, 14.87. HRMS(ESI) Calc. for  $\text{C}_{14}\text{H}_{20}\text{NO}_4\text{S}_2^+$  ( $\text{M} + \text{H}^+$ ): 330.0828, found: 330.0828.

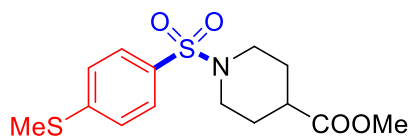

Methyl 1-((4-(methylthio)phenyl)sulfonyl)piperidine-4-carboxylate (**3av**)

33.4 mg, 51% yield. Off-white solid. M.p. 102.6 – 105.5 °C.

$^1\text{H}$  NMR (400 MHz,  $\text{CDCl}_3$ )  $\delta$  7.62 (d,  $J = 8.5$  Hz, 2H), 7.30 (d,  $J = 8.5$  Hz, 2H), 3.65 (s, 3H), 3.63 – 3.57 (m, 2H), 2.52 (s, 3H), 2.46 (td,  $J = 11.7, 2.5$  Hz, 2H), 2.29 – 2.22 (m, 1H), 1.96 (dd,  $J = 13.6, 3.3$  Hz, 2H), 1.85 – 1.76 (m, 2H).  $^{13}\text{C}$  NMR (101 MHz,  $\text{CDCl}_3$ )  $\delta$  174.36, 145.96, 131.86, 128.04, 125.43, 52.01, 45.50, 39.97, 29.81, 27.52, 14.87. HRMS(ESI) Calc. for  $\text{C}_{14}\text{H}_{20}\text{NO}_4\text{S}_2^+$  ( $\text{M} + \text{H}^+$ ): 330.0828, found: 330.0838.

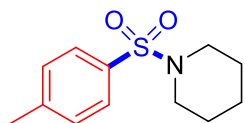

1-Tosylpiperidine (**3aw**)

24.7 mg, 52% yield. White solid.

$^1\text{H}$  NMR (400 MHz,  $\text{CDCl}_3$ )  $\delta$  7.63 (d,  $J = 8.0$  Hz, 2H), 7.31 (d,  $J = 7.9$  Hz, 2H), 2.98 – 2.93 (m, 4H), 2.43 (s, 3H), 1.65 – 1.60 (m, 4H), 1.43 – 1.37 (m, 2H).  $^{13}\text{C}$  NMR (101 MHz,  $\text{CDCl}_3$ )  $\delta$  143.42, 133.35, 129.66, 127.84, 47.06, 25.28, 23.64, 21.65.

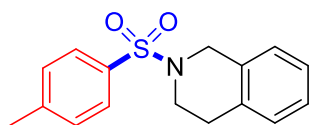

2-Tosyl-1,2,3,4-tetrahydroisoquinoline (**3ax**)

29.5 mg, 52% yield. Off-white solid.

$^1\text{H}$  NMR (400 MHz,  $\text{CDCl}_3$ )  $\delta$  7.73 (d,  $J = 8.0$  Hz, 2H), 7.32 (d,  $J = 7.9$  Hz, 2H), 7.16 – 7.11 (m, 2H), 7.09 – 7.06 (m, 1H), 7.05 – 7.00 (m, 1H), 4.24 (s, 2H), 3.35 (t,  $J = 5.9$  Hz, 2H), 2.93 (t,  $J = 5.8$  Hz, 2H), 2.42 (s, 3H).  $^{13}\text{C}$  NMR (101 MHz,  $\text{CDCl}_3$ )  $\delta$  143.81, 133.30, 133.17, 131.73, 129.82, 128.92, 127.86, 126.84, 126.47, 126.44, 47.65, 43.84, 28.98, 21.64.

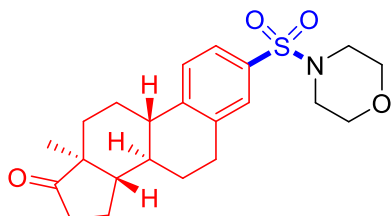

(8*R*,9*S*,13*S*,14*S*)-13-Methyl-3-(morpholinosulfonyl)-6,7,8,9,11,12,13,14,15,16-decahydro-17*H*-cyclopenta[*a*]phenanthren-17-one (**4a**)

61.7 mg, 73% yield. White sticky solid.

$^1\text{H}$  NMR (400 MHz,  $\text{CDCl}_3$ )  $\delta$  7.51 – 7.43 (m, 3H), 3.73 (t,  $J = 4.8$  Hz, 4H), 3.00 – 2.95 (m, 6H), 2.52 (dd,  $J = 18.7, 8.6$  Hz, 1H), 2.47 – 2.41 (m, 1H), 2.35 (td,  $J = 10.9, 3.9$  Hz, 1H), 2.20 – 1.98 (m, 4H), 1.67 – 1.46 (m, 6H), 0.92 (s, 3H).  $^{13}\text{C}$  NMR (101 MHz,  $\text{CDCl}_3$ )  $\delta$  220.47, 145.64, 138.03, 132.22, 128.32, 126.30, 125.32, 66.23, 50.55, 47.95, 46.12, 44.63, 37.73, 35.89, 31.58, 29.48, 26.18, 25.64, 21.68, 13.91. HRMS(ESI) Calc. for  $\text{C}_{22}\text{H}_{30}\text{NO}_4\text{S}^+$  ( $\text{M} + \text{H}^+$ ): 404.1890, found: 404.1894.

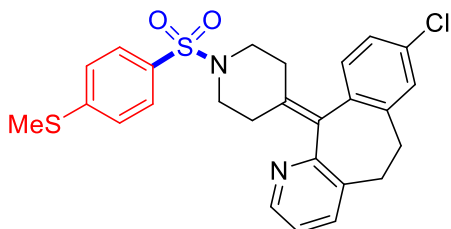

8-Chloro-11-(1-((4-(methylthio)phenyl)sulfonyl)piperidin-4-ylidene)-6,11-dihydro-5*H*-benzo[5,6]cyclohepta[1,2-*b*]pyridine (**4b**)

48.7 mg, 49% yield. Light yellow oil.

$^1\text{H}$  NMR (400 MHz,  $\text{CDCl}_3$ )  $\delta$  8.36 (dd,  $J = 4.7, 1.5$  Hz, 1H), 7.65 – 7.60 (m, 2H), 7.41 (dd,  $J = 7.7, 1.3$  Hz, 1H), 7.32 – 7.29 (m, 2H), 7.14 – 7.06 (m, 3H), 7.01 (d,  $J = 8.1$  Hz, 1H), 3.33 – 3.19 (m, 4H), 2.95 – 2.88 (m, 2H), 2.82 – 2.71 (m, 2H), 2.64 – 2.58 (m, 1H), 2.54 (s, 3H), 2.52 – 2.45 (m, 1H), 2.39 – 2.31 (m, 2H).  $^{13}\text{C}$  NMR (101 MHz,  $\text{CDCl}_3$ )  $\delta$  156.72, 146.78, 145.93, 139.63, 137.78, 137.44, 135.90, 134.93, 133.49, 133.23, 132.23,

130.50, 129.14, 128.05, 126.33, 125.56, 122.53, 47.47, 31.71, 31.56, 30.30, 30.03, 14.96. HRMS(ESI) Calc. for  $C_{26}H_{26}ClN_2O_2S_2^+$  (M + H<sup>+</sup>): 497.1119, found: 497.1101.

References:

[1] This compound is known, and NMR data is in agreement with reported in *J. Am. Chem. Soc.* **2018**, *140*, 8781.

[2] This compound is known, and NMR data is in agreement with reported in *Green Chem.* **2015**, *17*, 1395.

[3] This compound is known, and NMR data is in agreement with reported in *Org. Lett.* **2018**, *20*, 1167.

[4] This compound is known, and NMR data is in agreement with reported in *Synlett* **2016**, *27*, 101.

[5] This compound is known, and NMR data is in agreement with reported in *Tetrahedron Lett.* **2011**, *52*, 820.

[6] This compound is known, and NMR data is in agreement with reported in *Angew. Chem. Int. Ed.* **2014**, *53*, 10204.

[7] This compound is known, and NMR data is in agreement with reported in *J. Am. Chem. Soc.* **2011**, *133*, 9250.

[8] This compound is known, and NMR data is in agreement with reported in *J. Am. Chem. Soc.* **2012**, *134*, 9086.



## 5. $^1\text{H}$ , $^{13}\text{C}$ and $^{19}\text{F}$ NMR spectra of compounds 3 and 4.

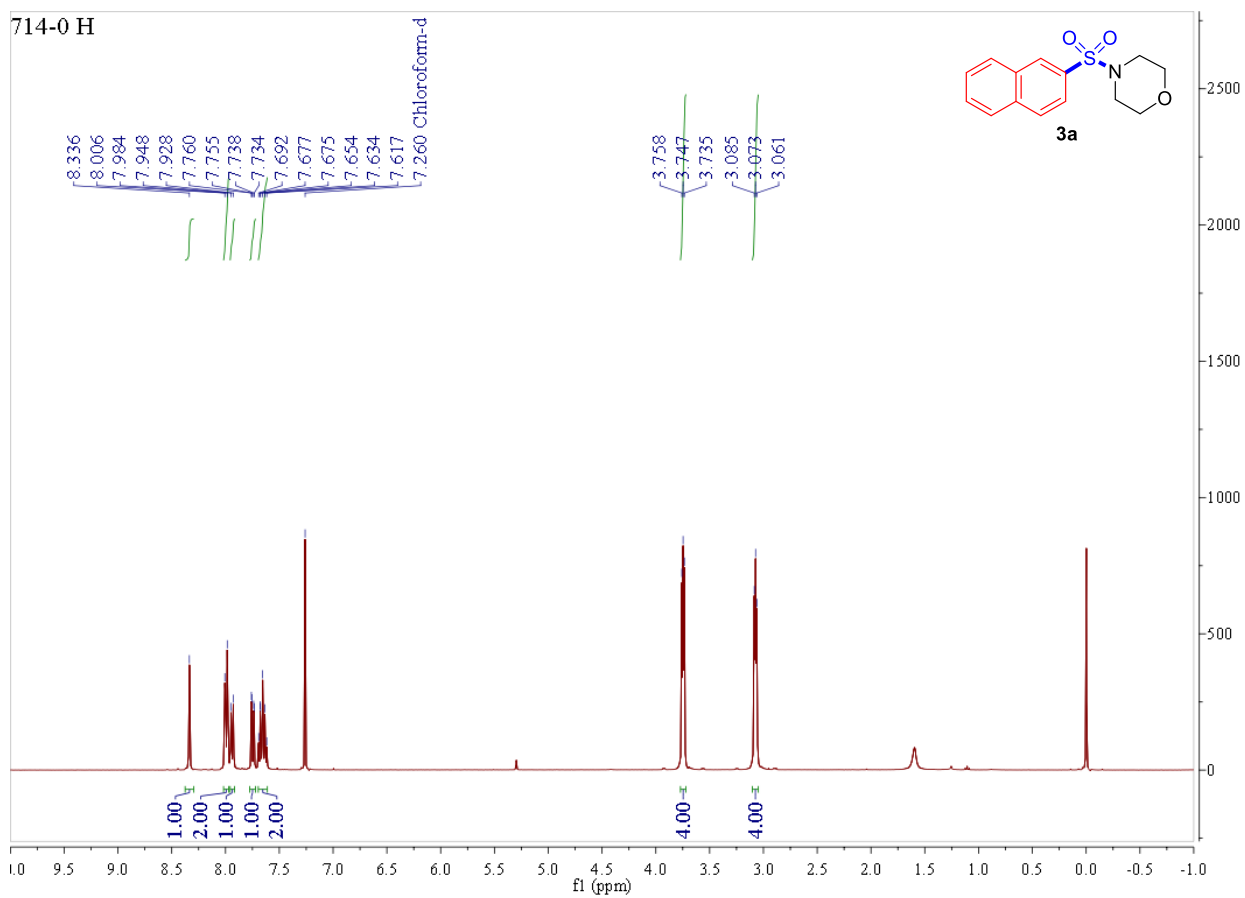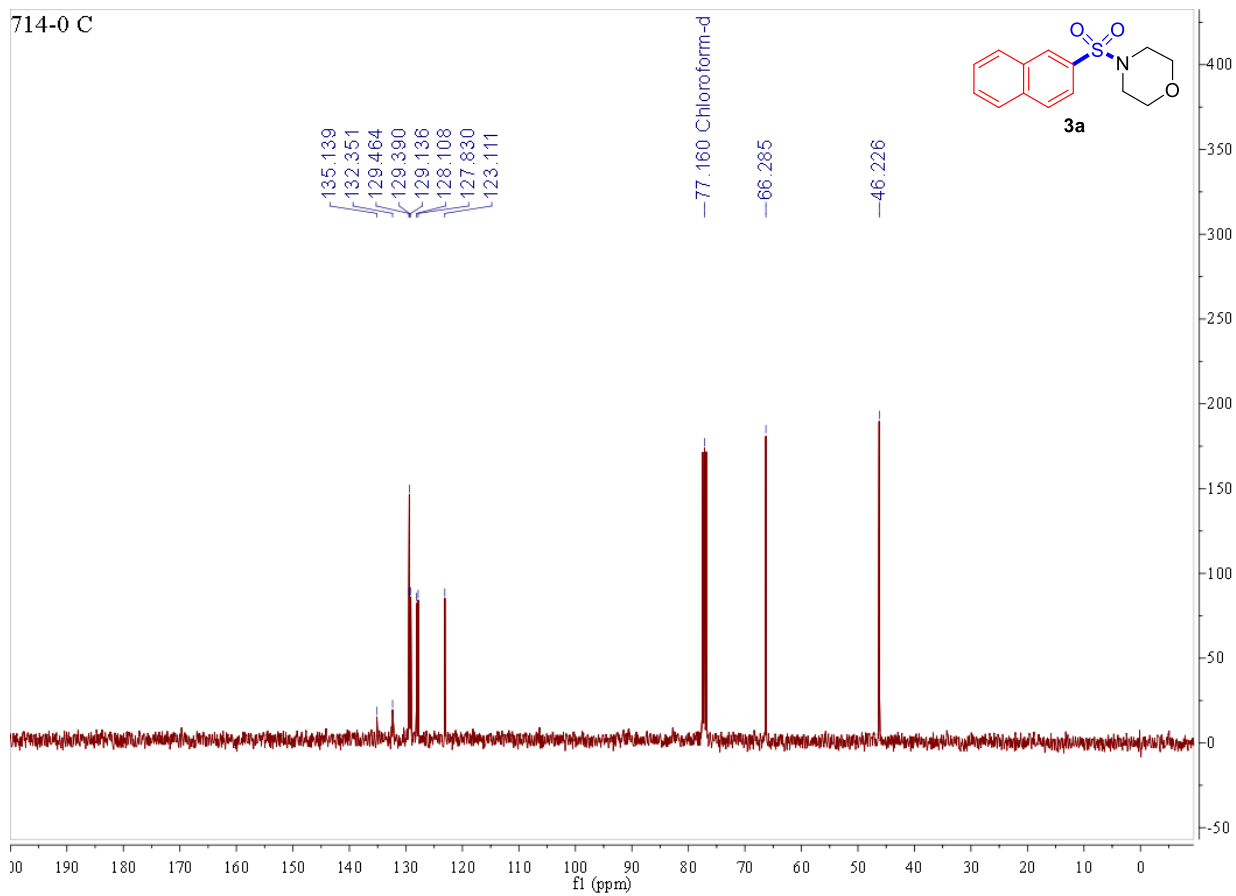

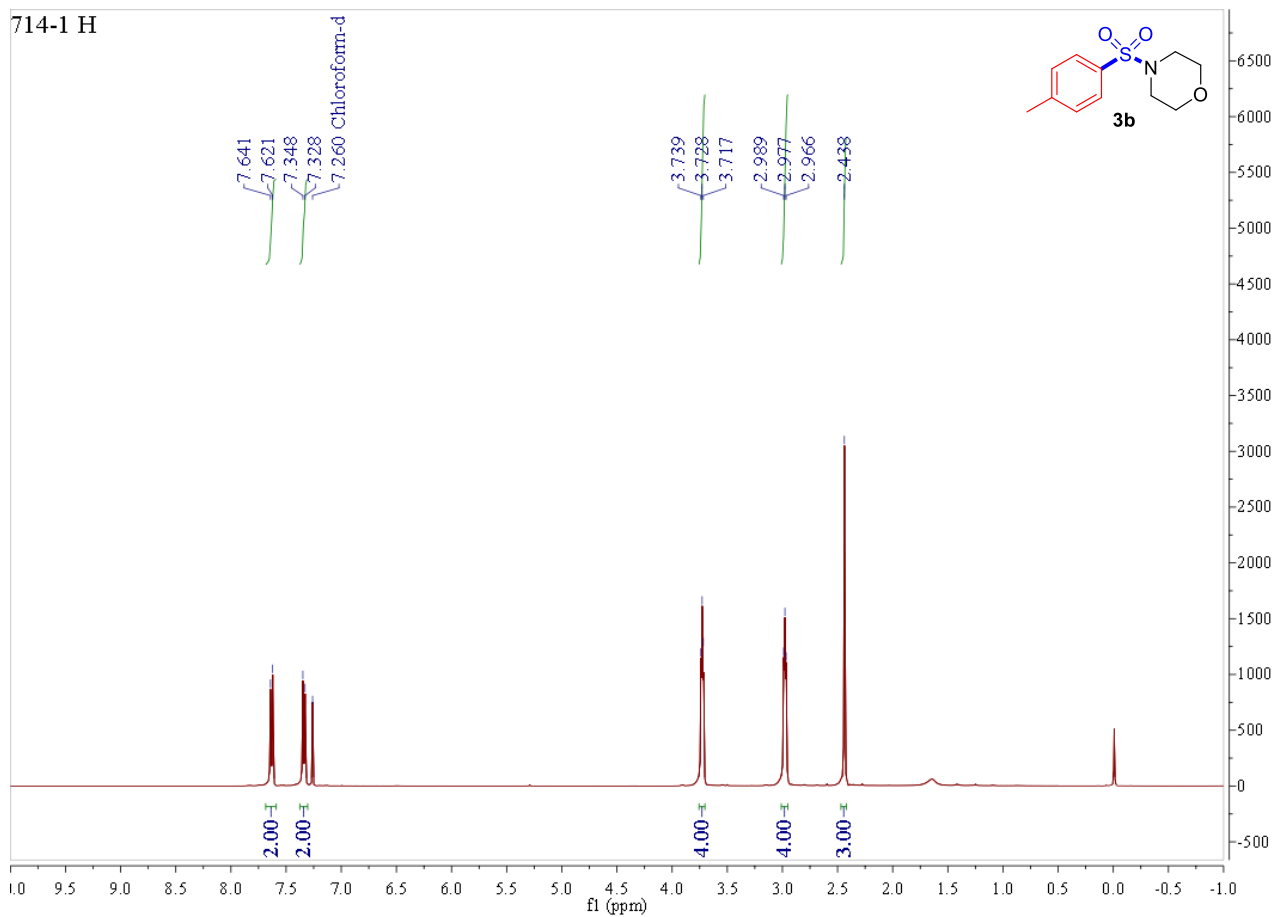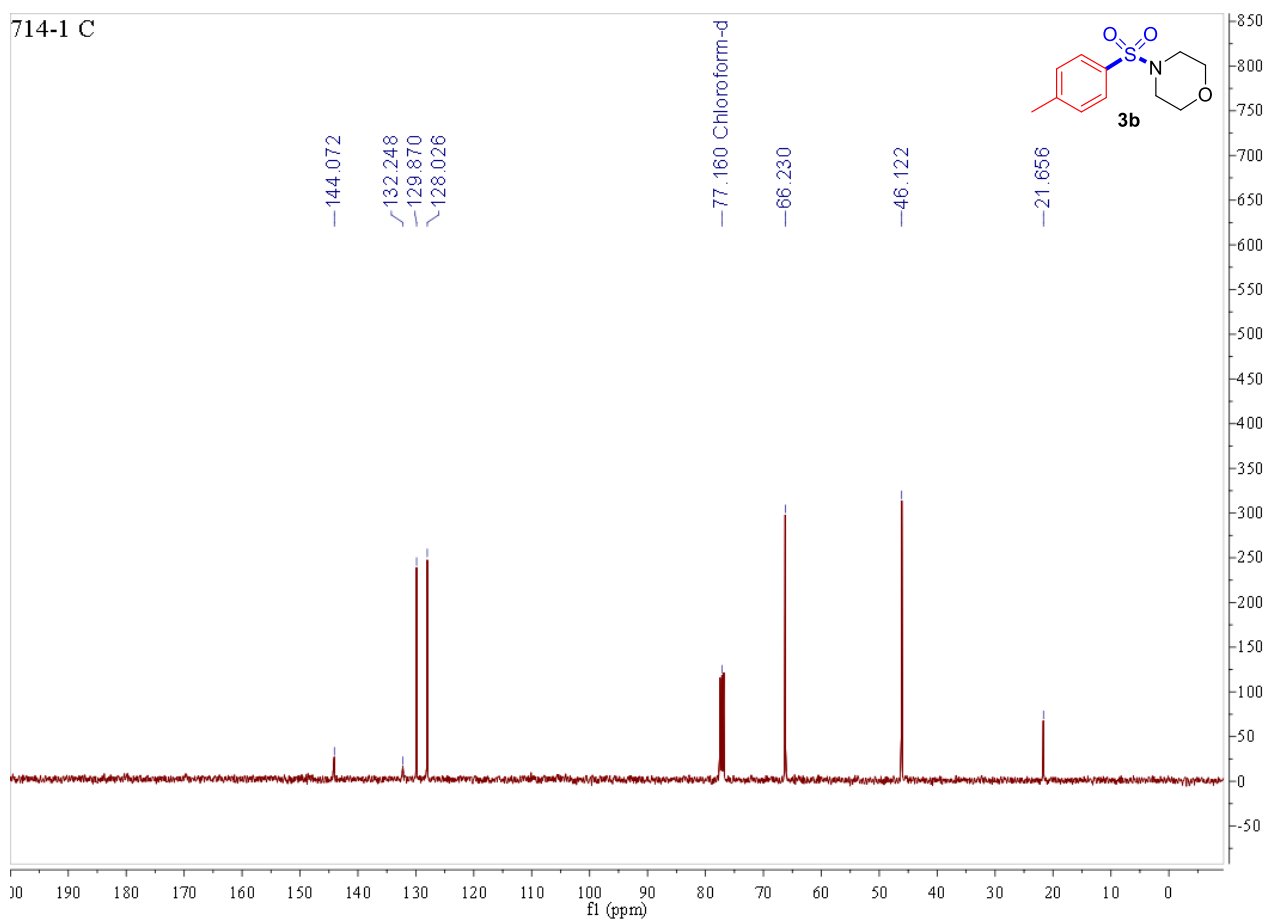

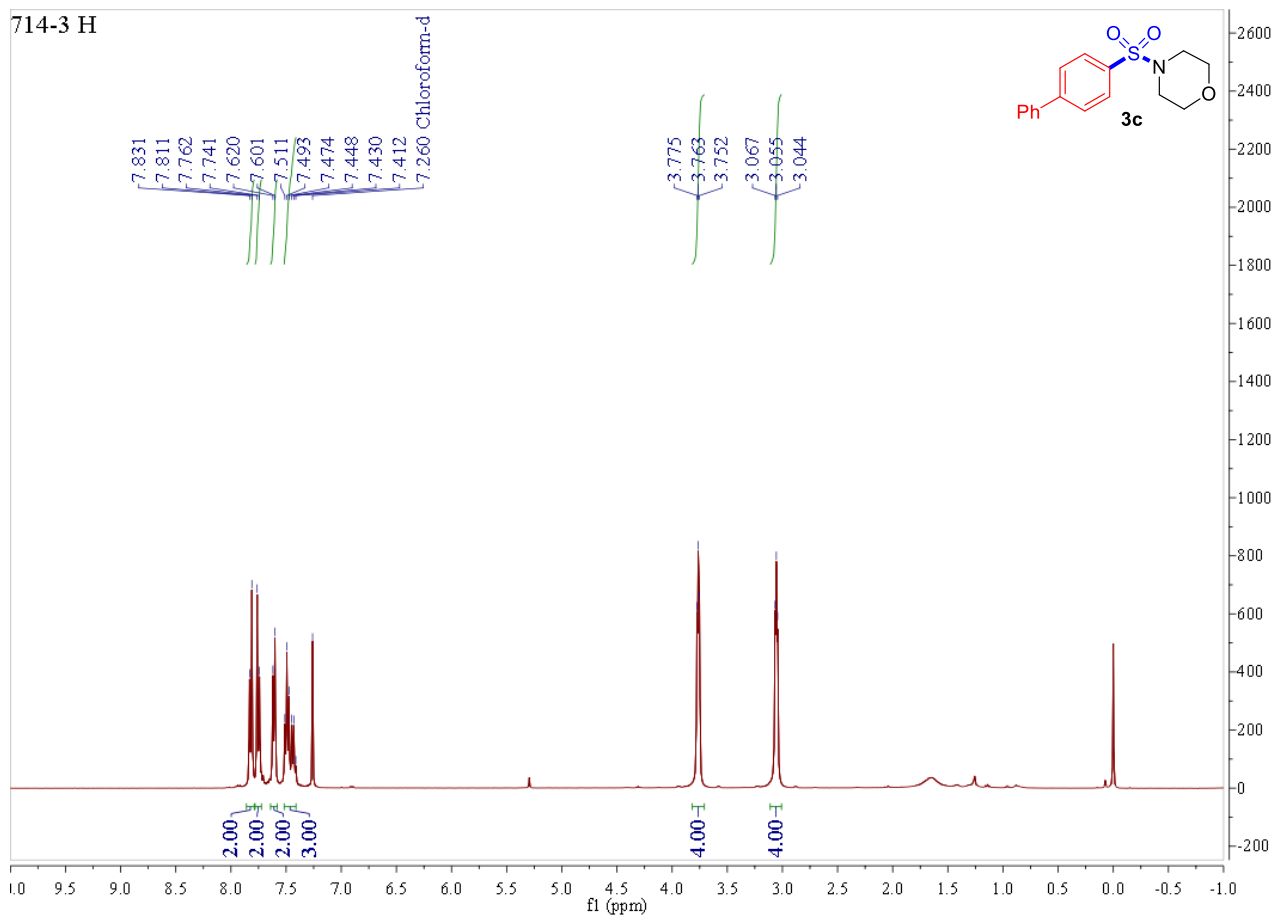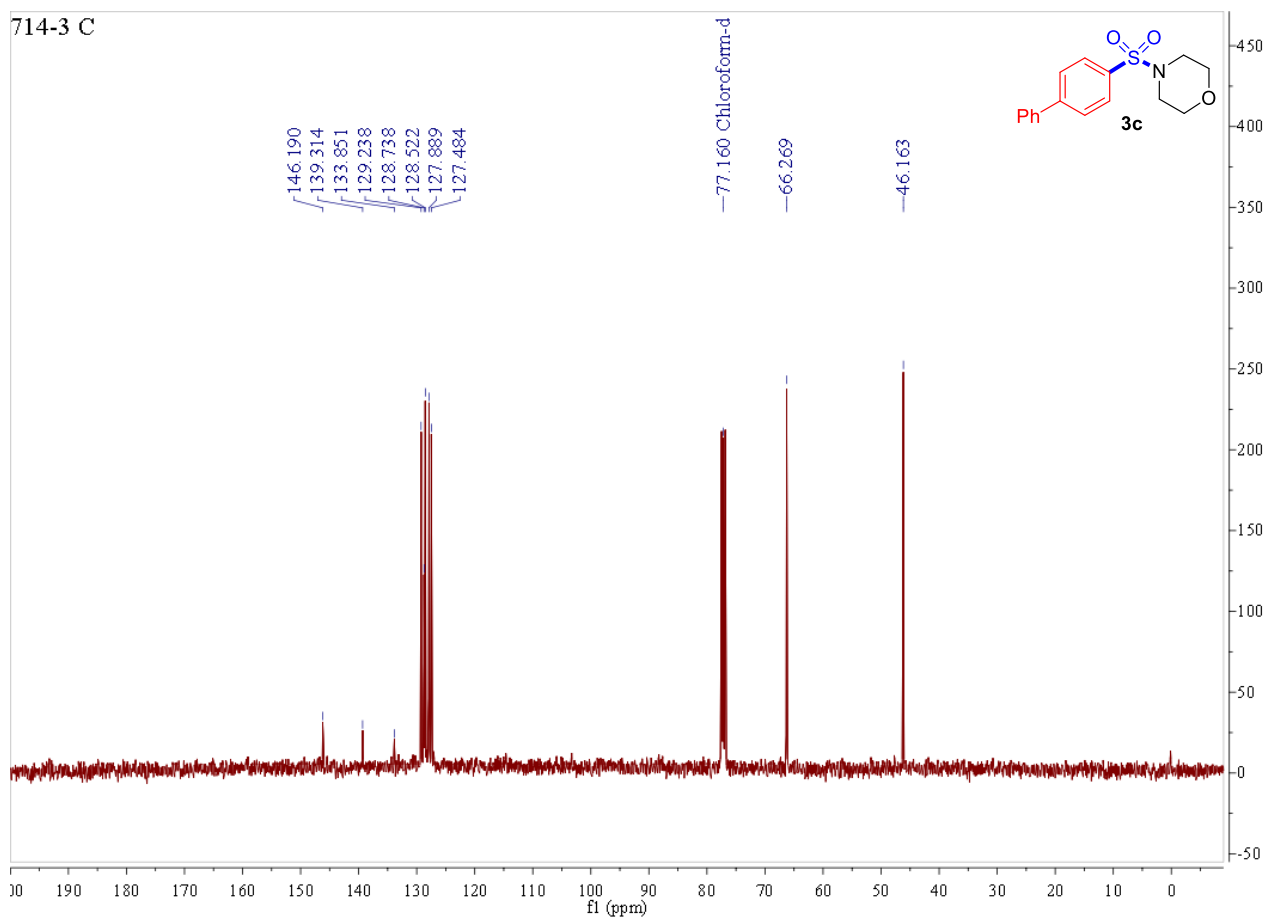

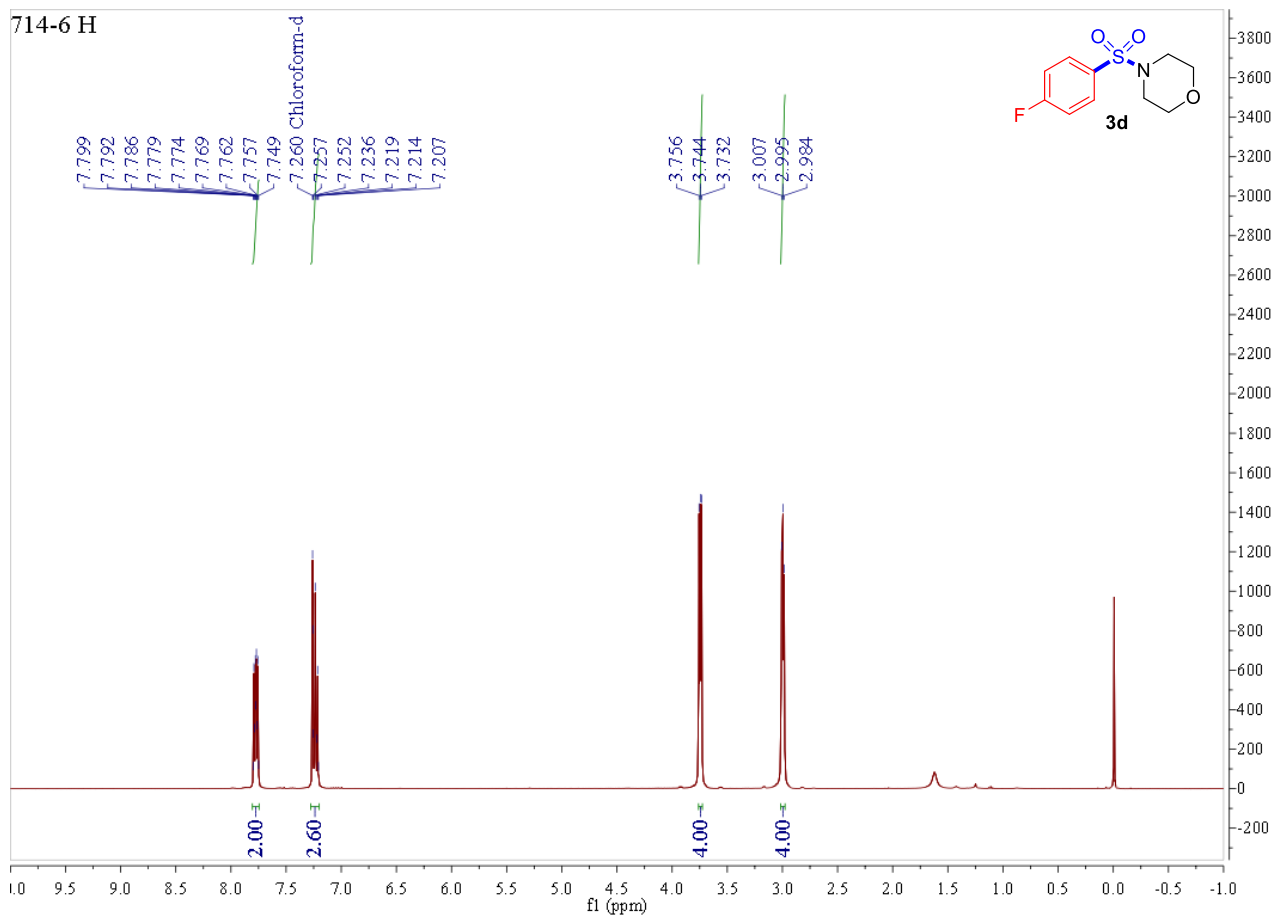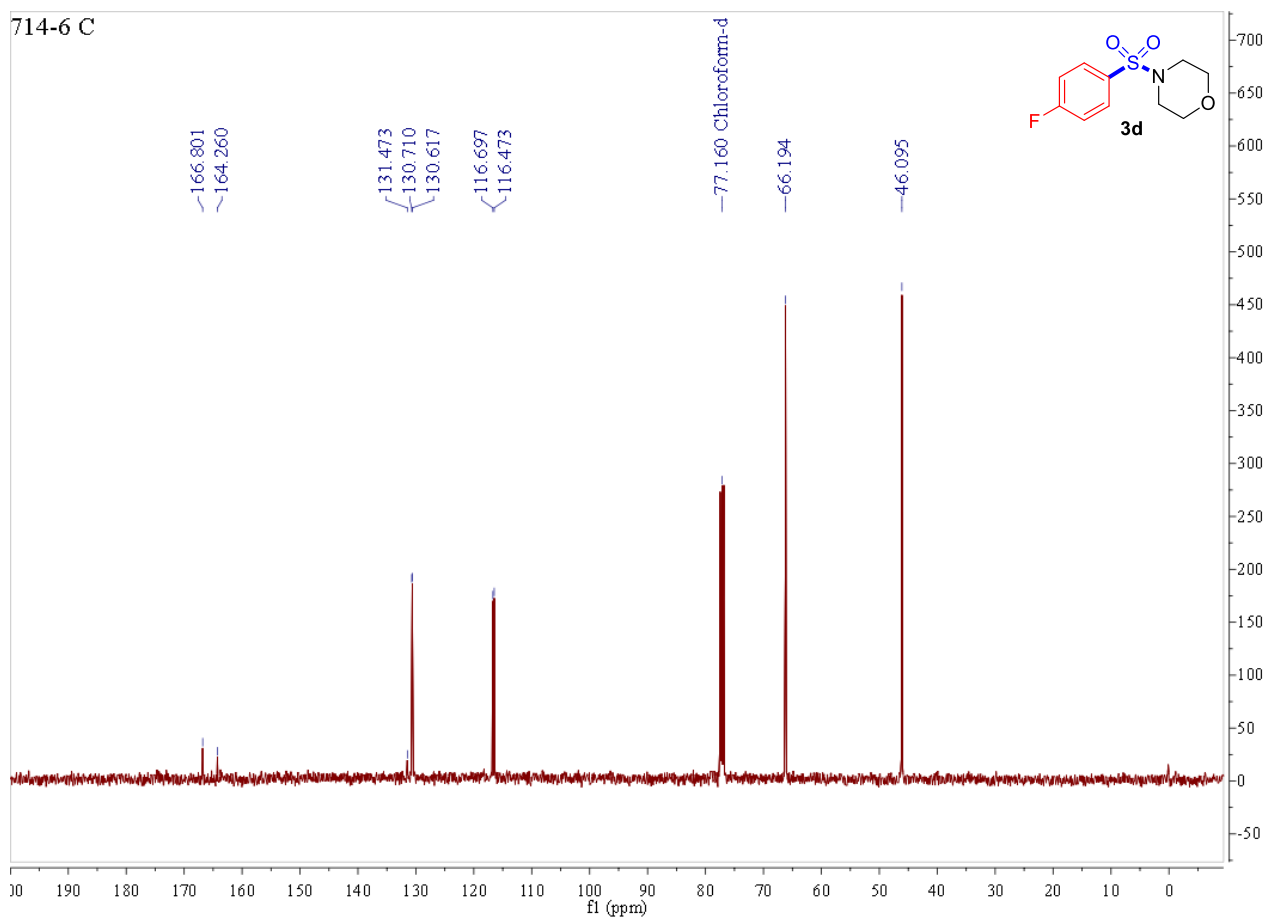

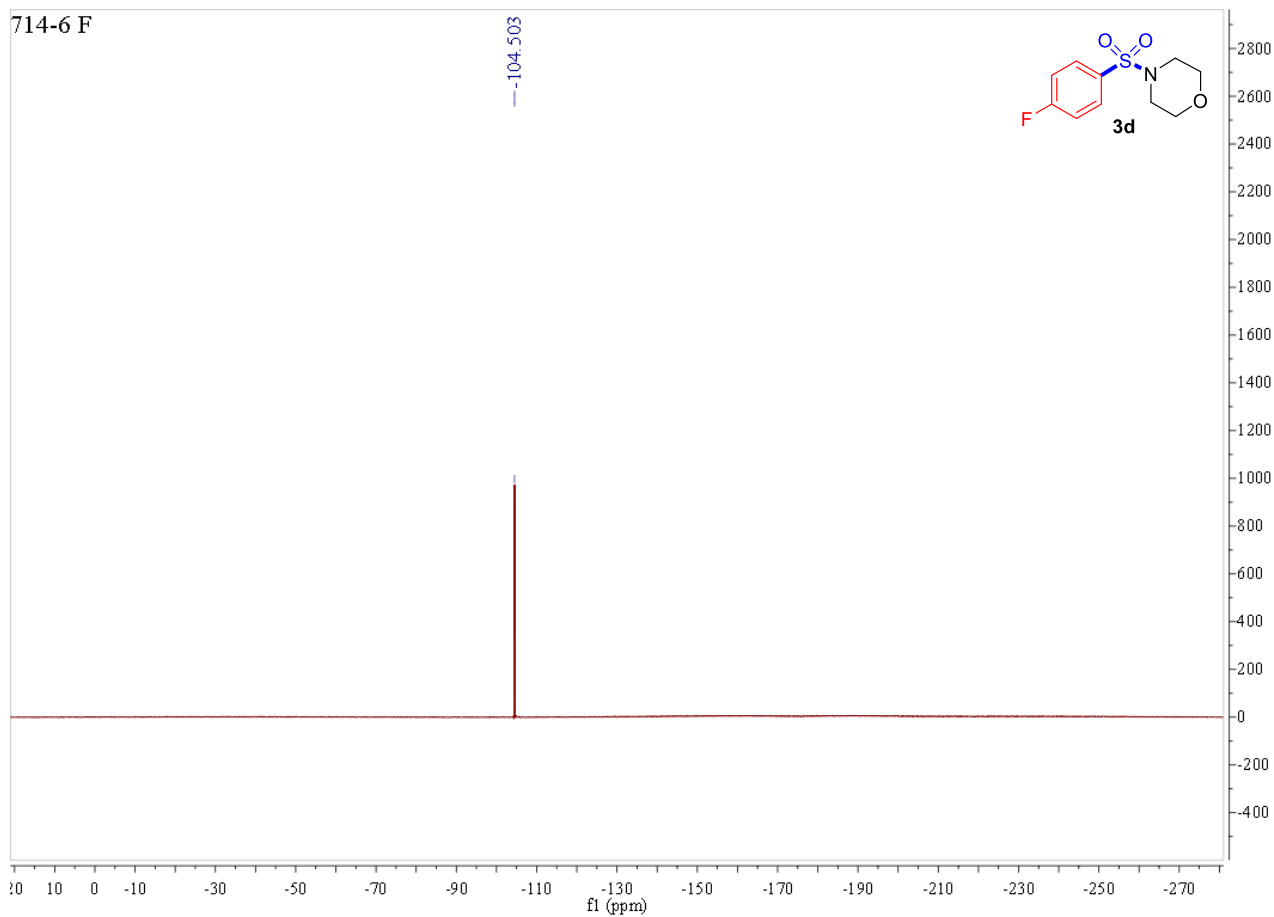

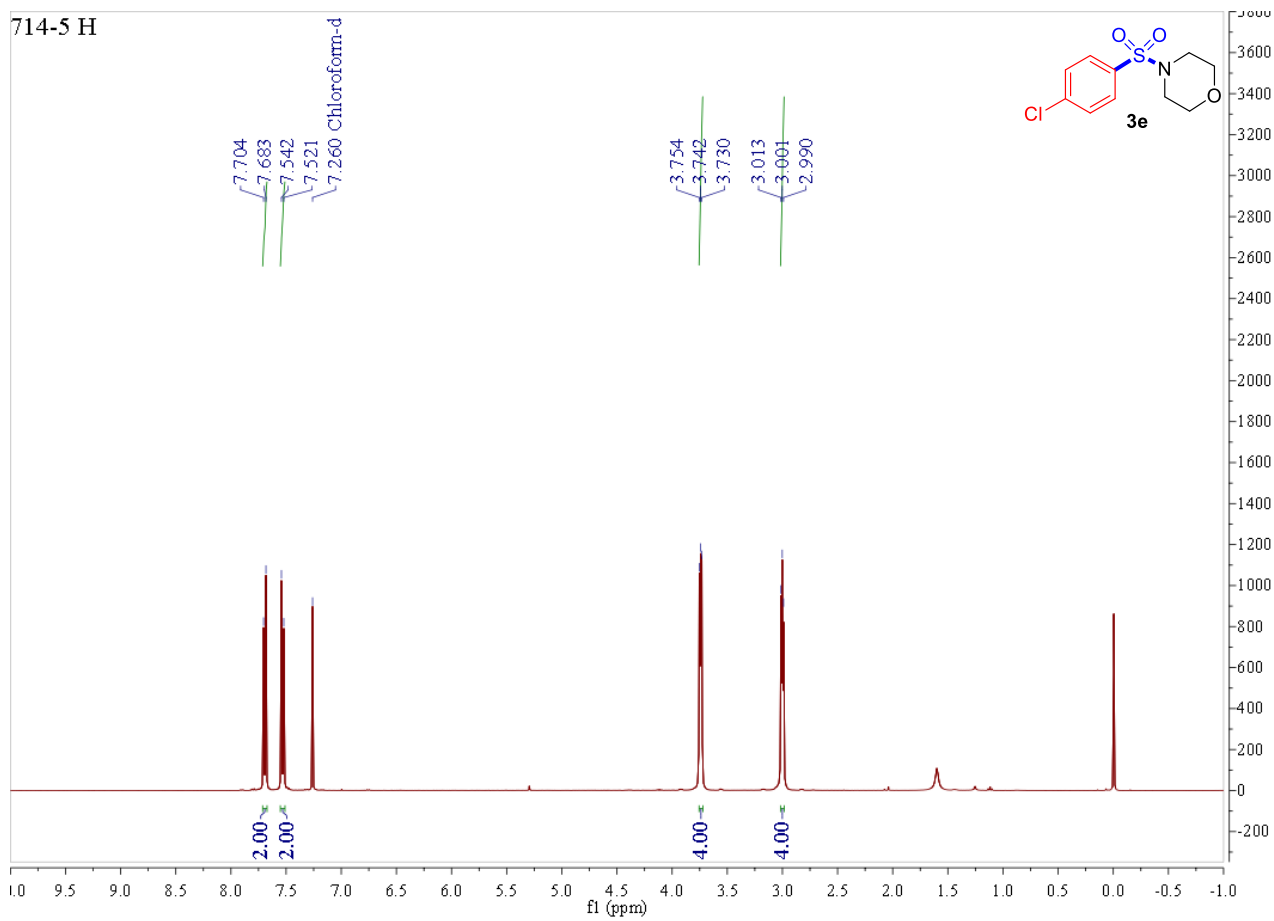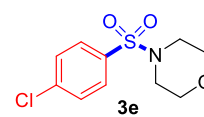

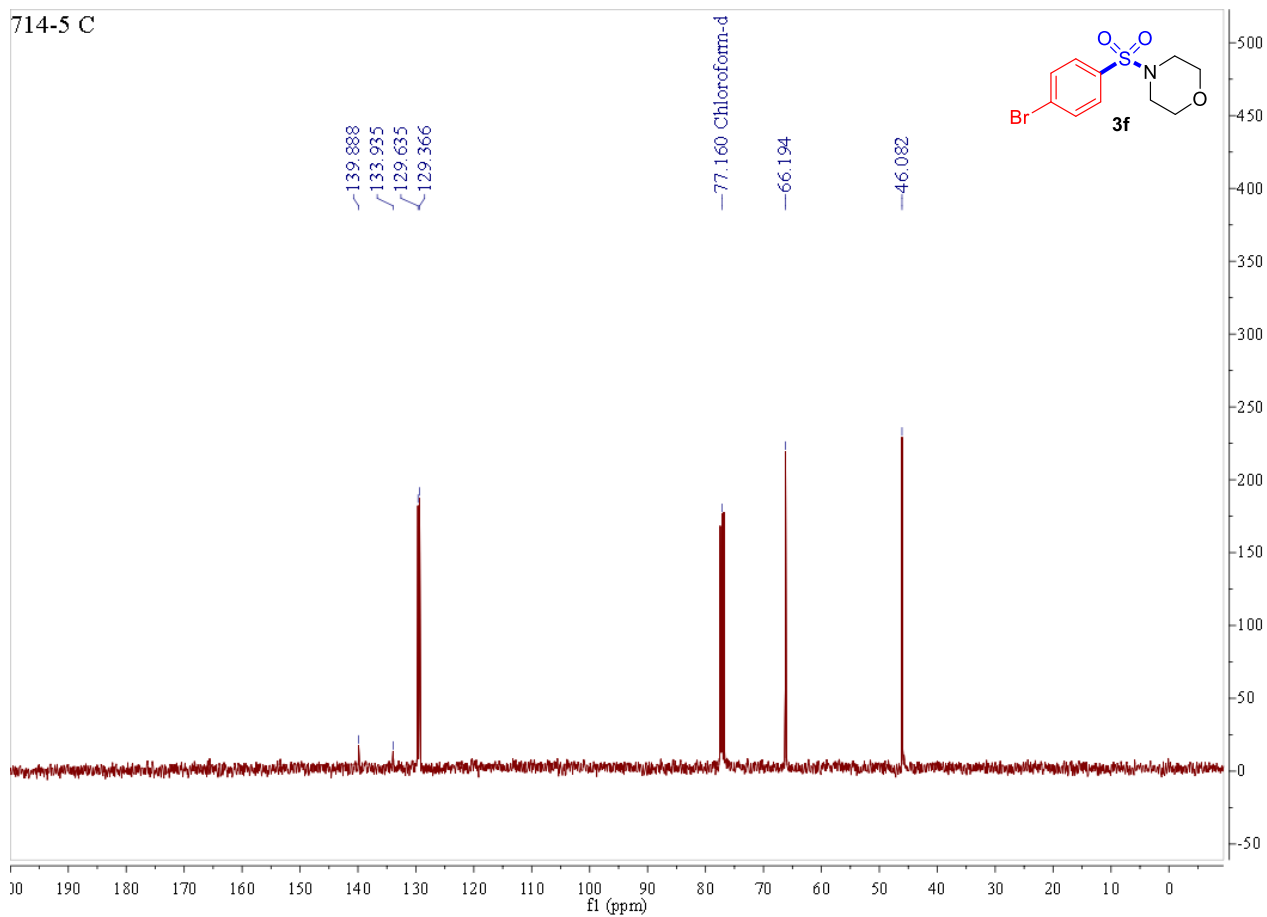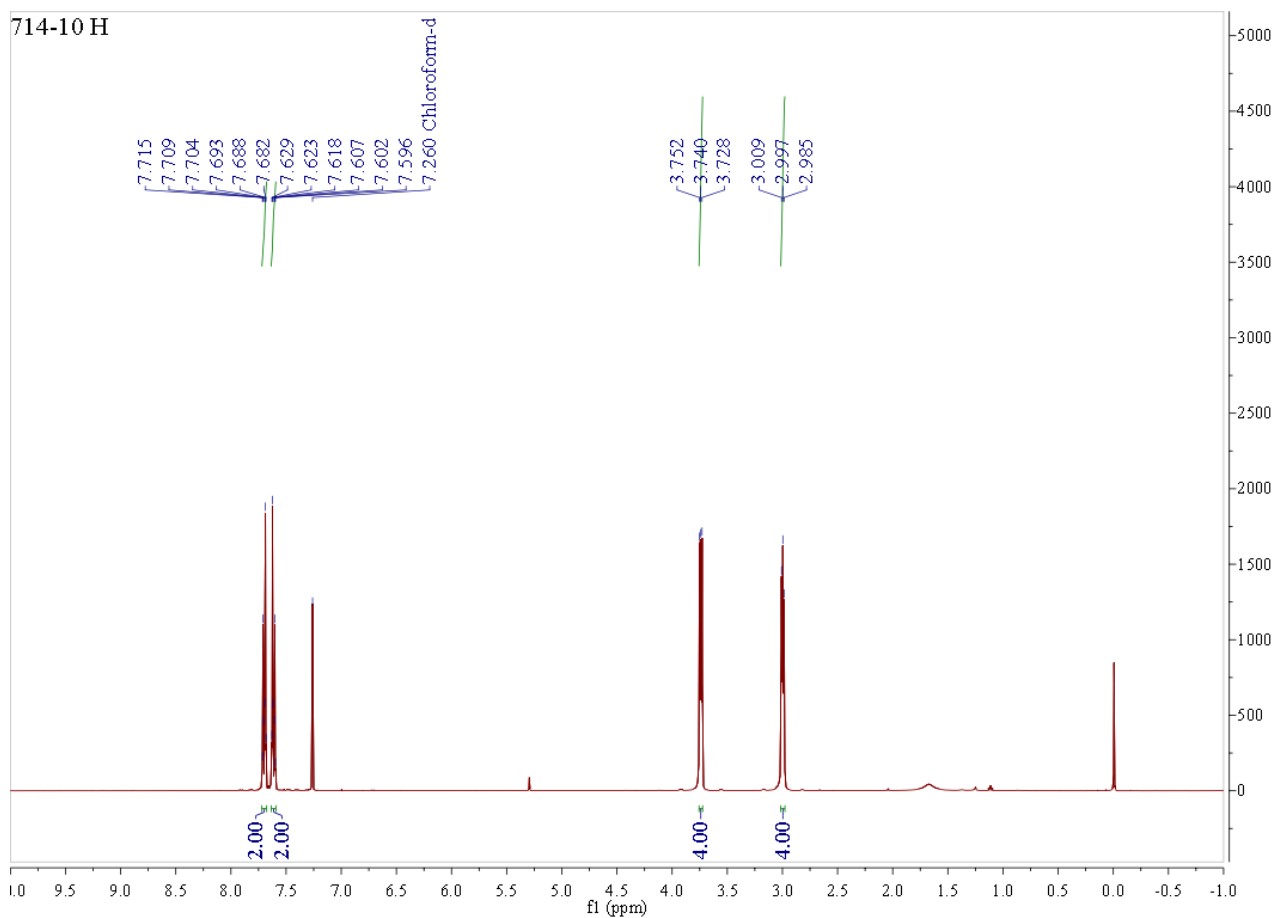

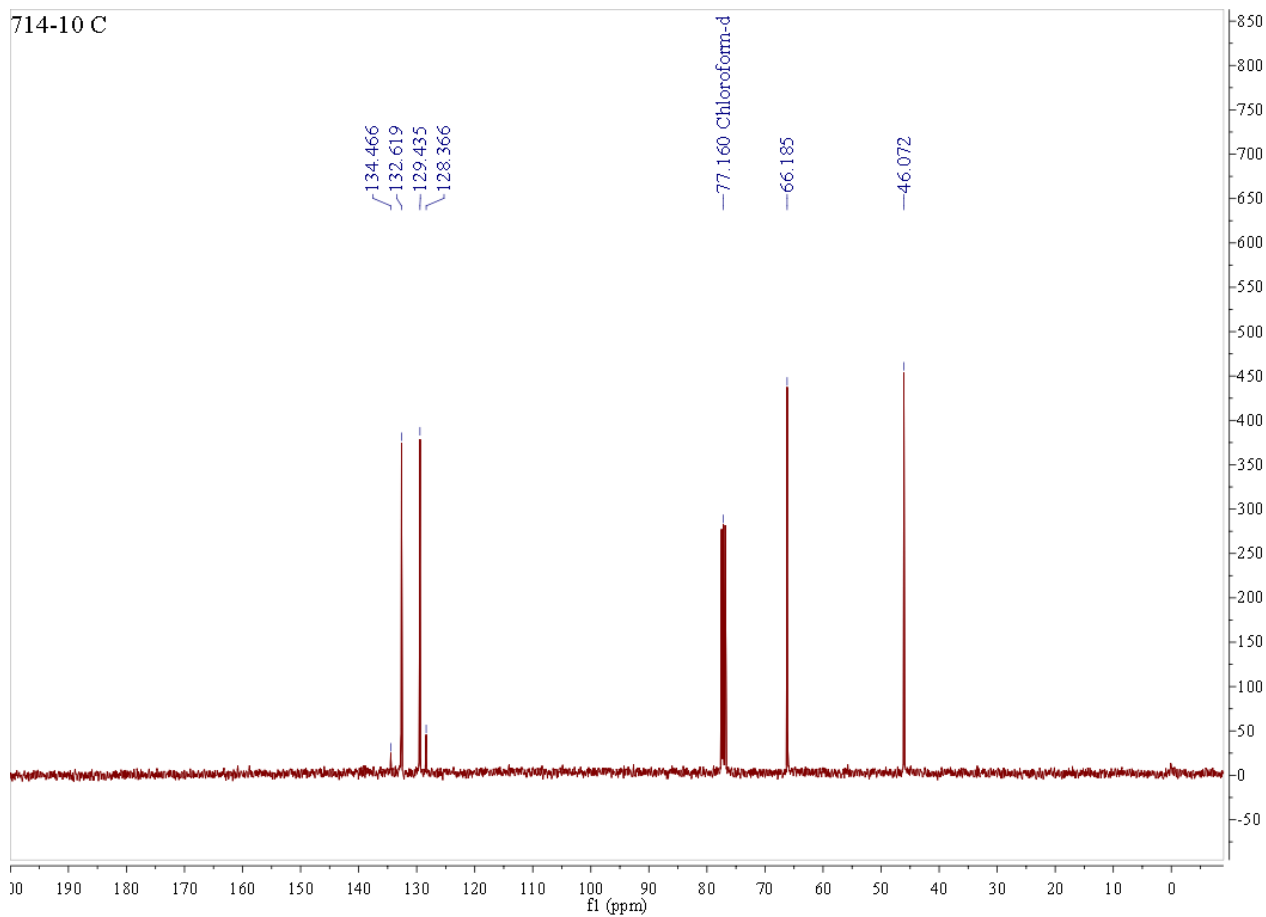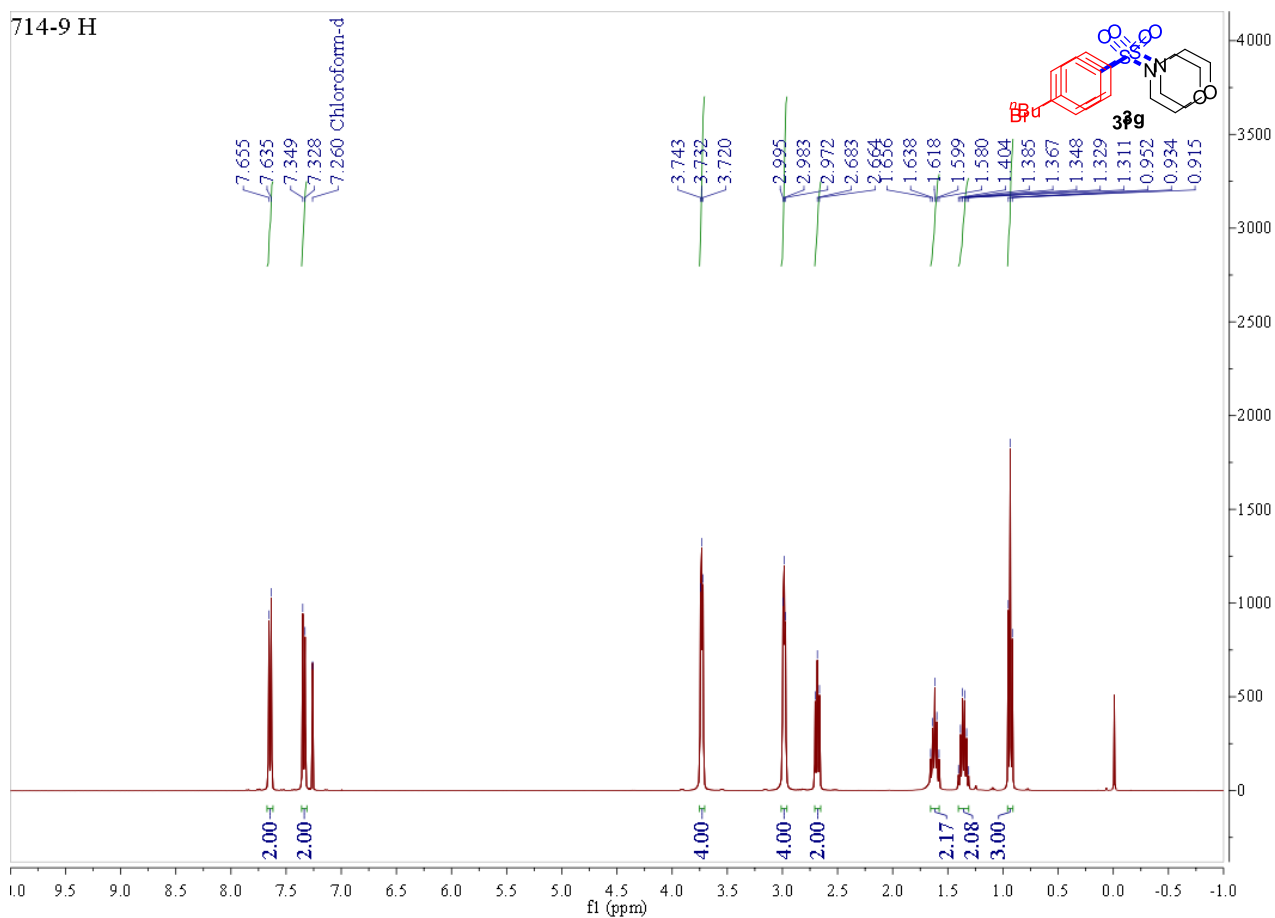

S32

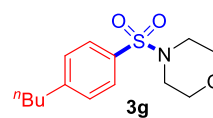



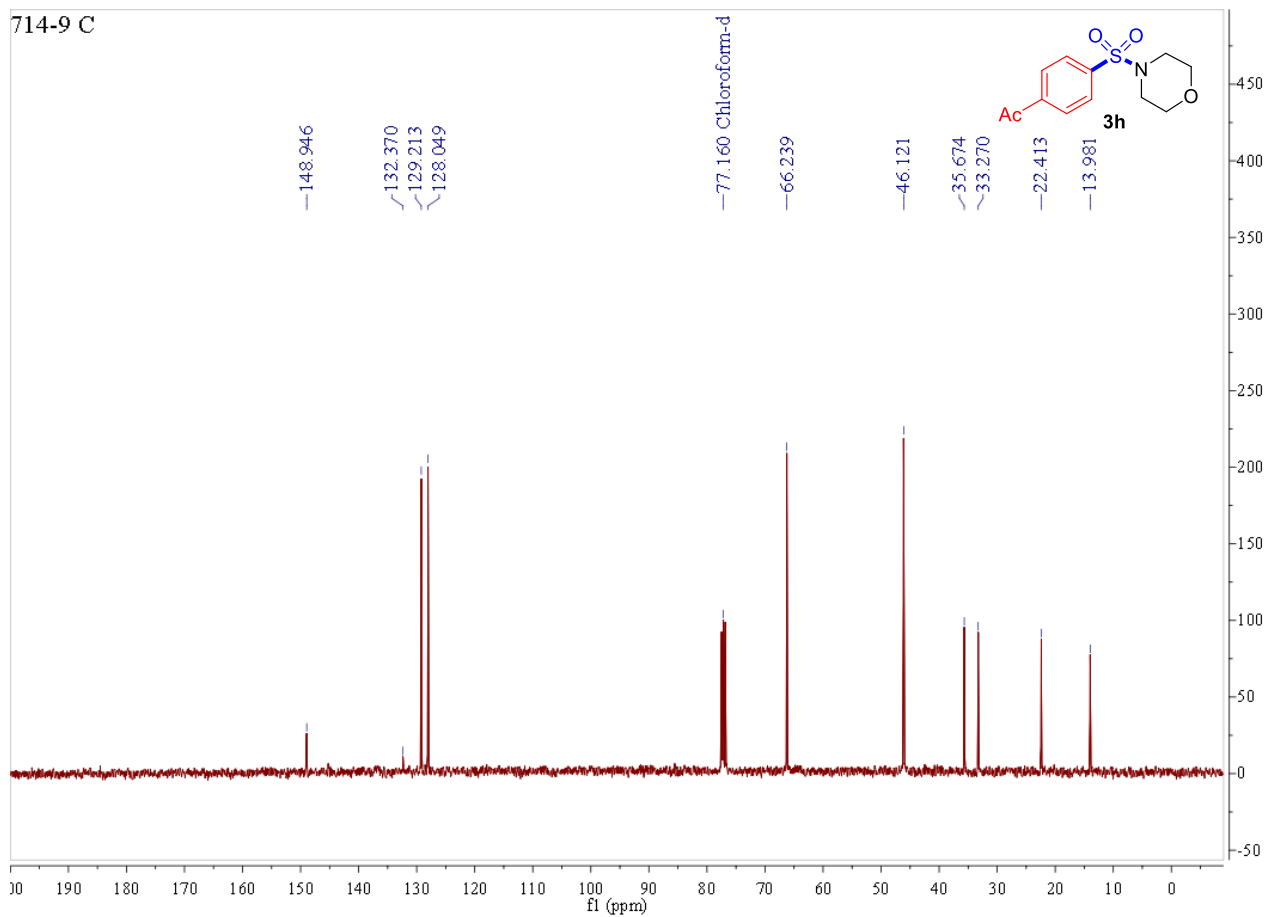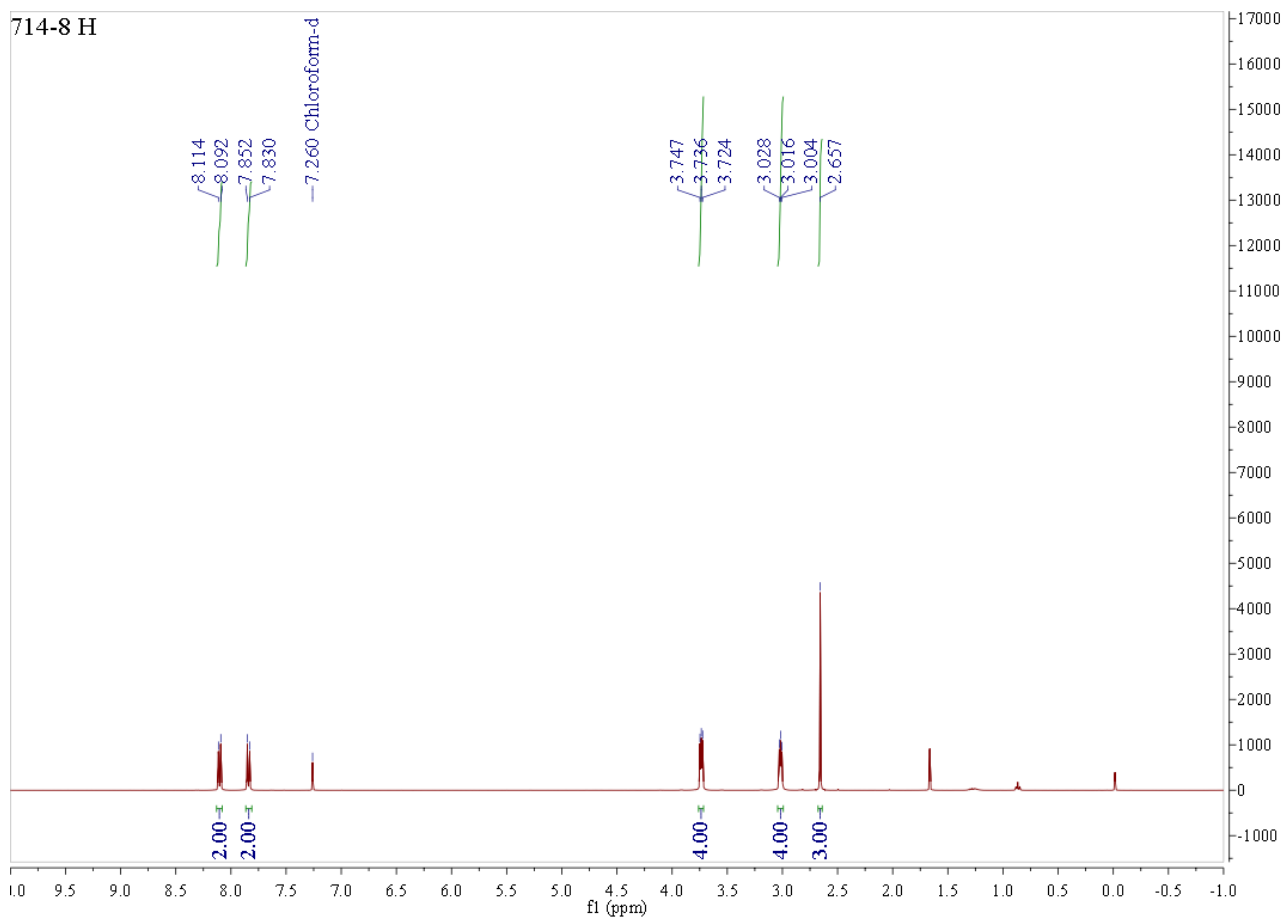

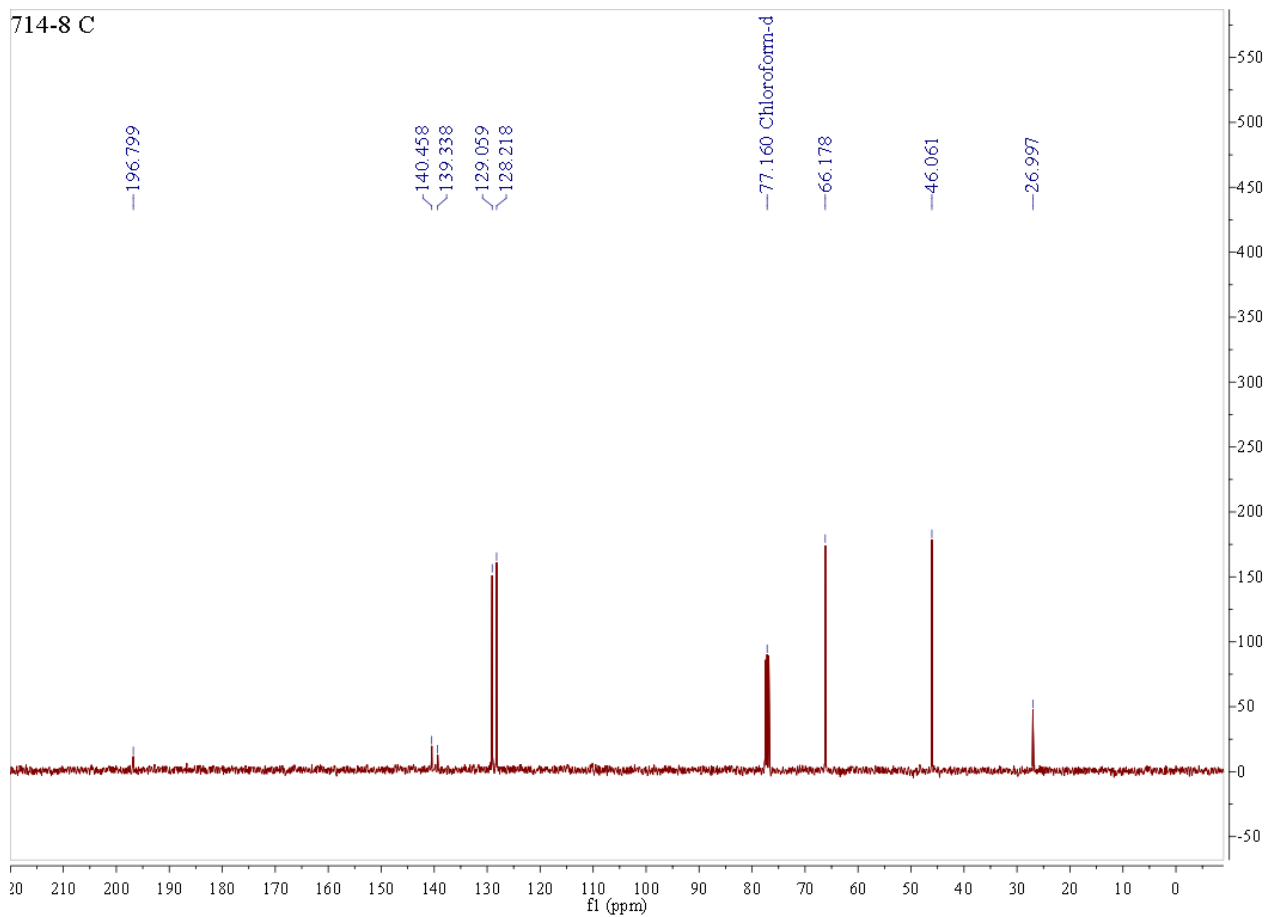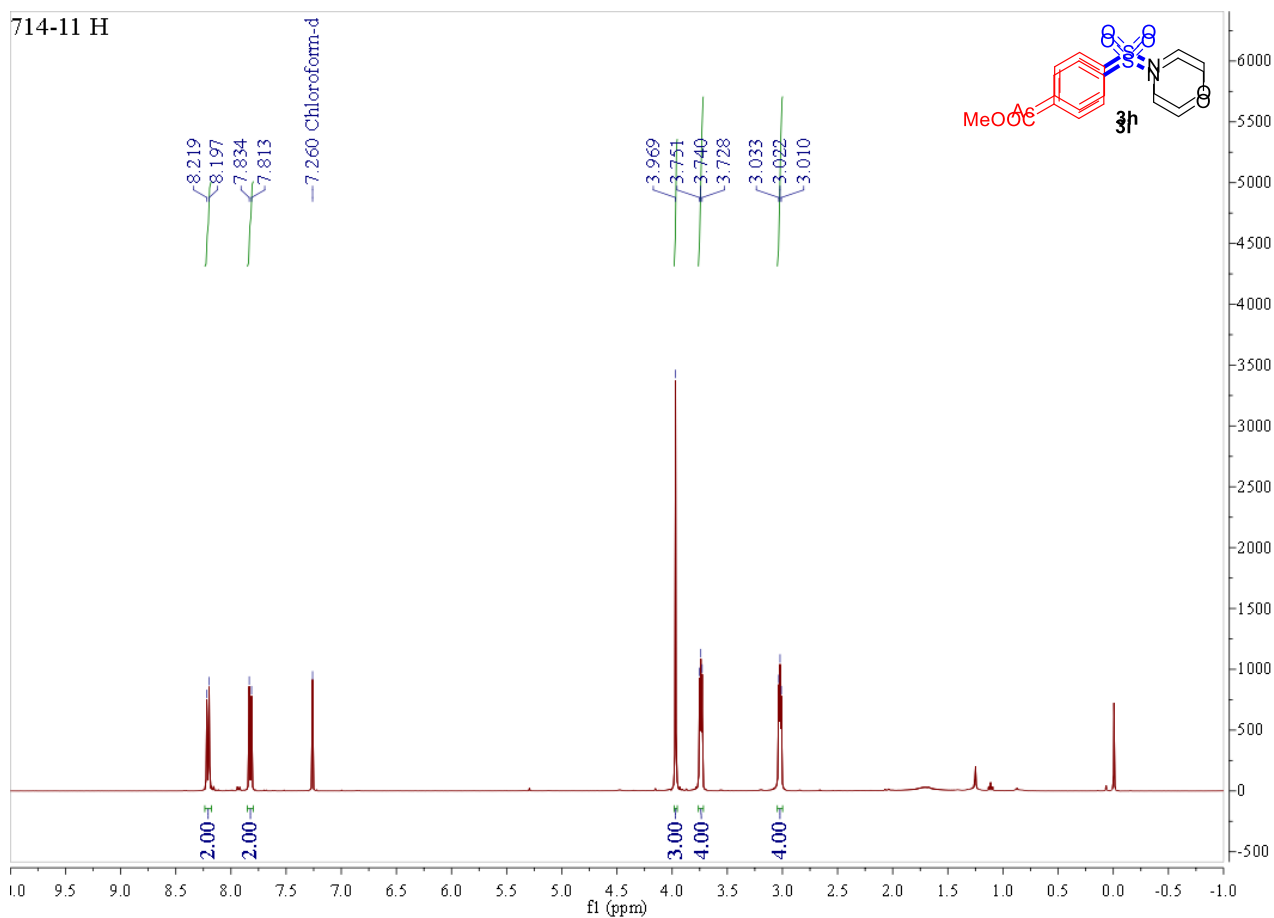

S34

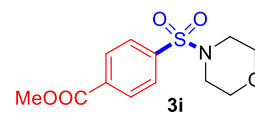

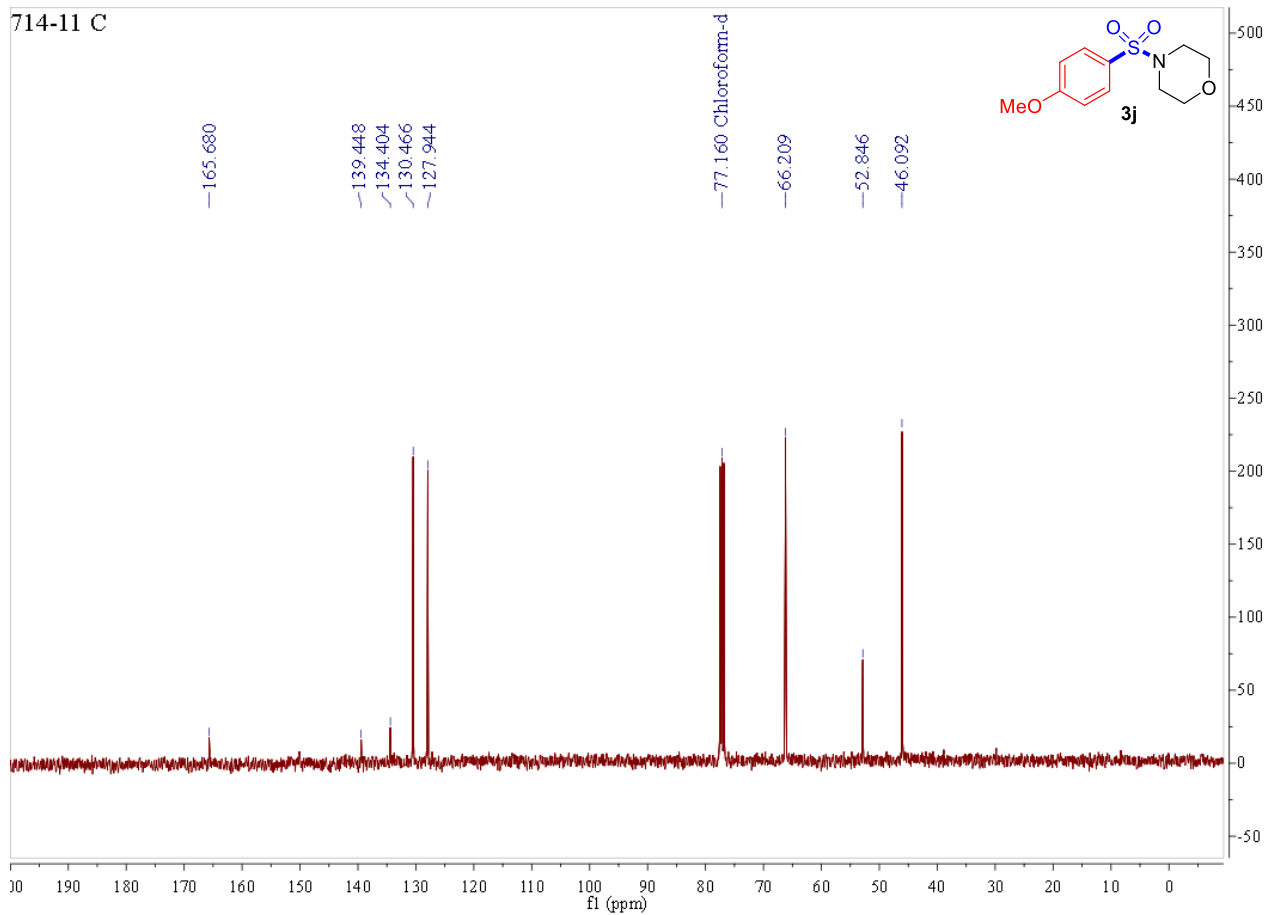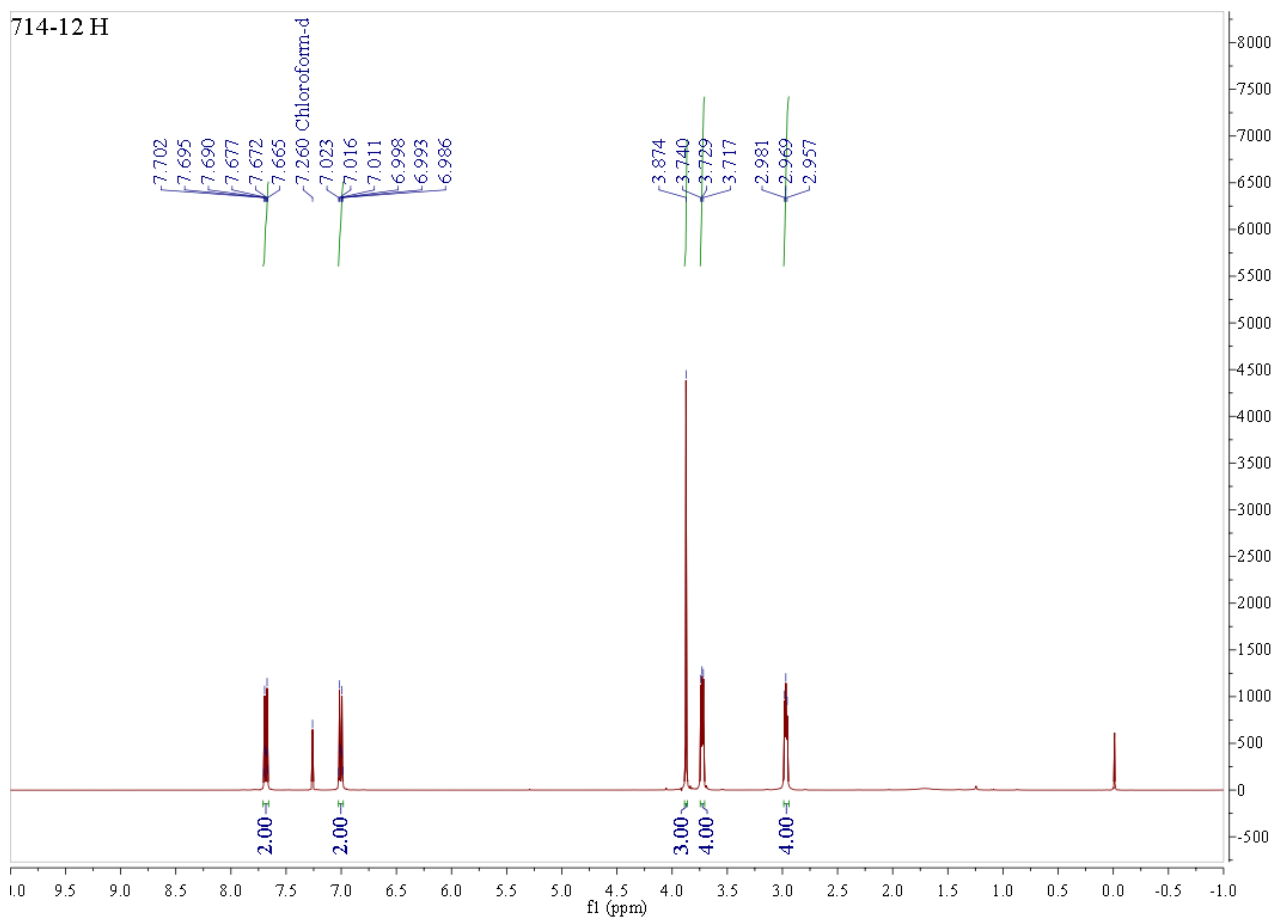

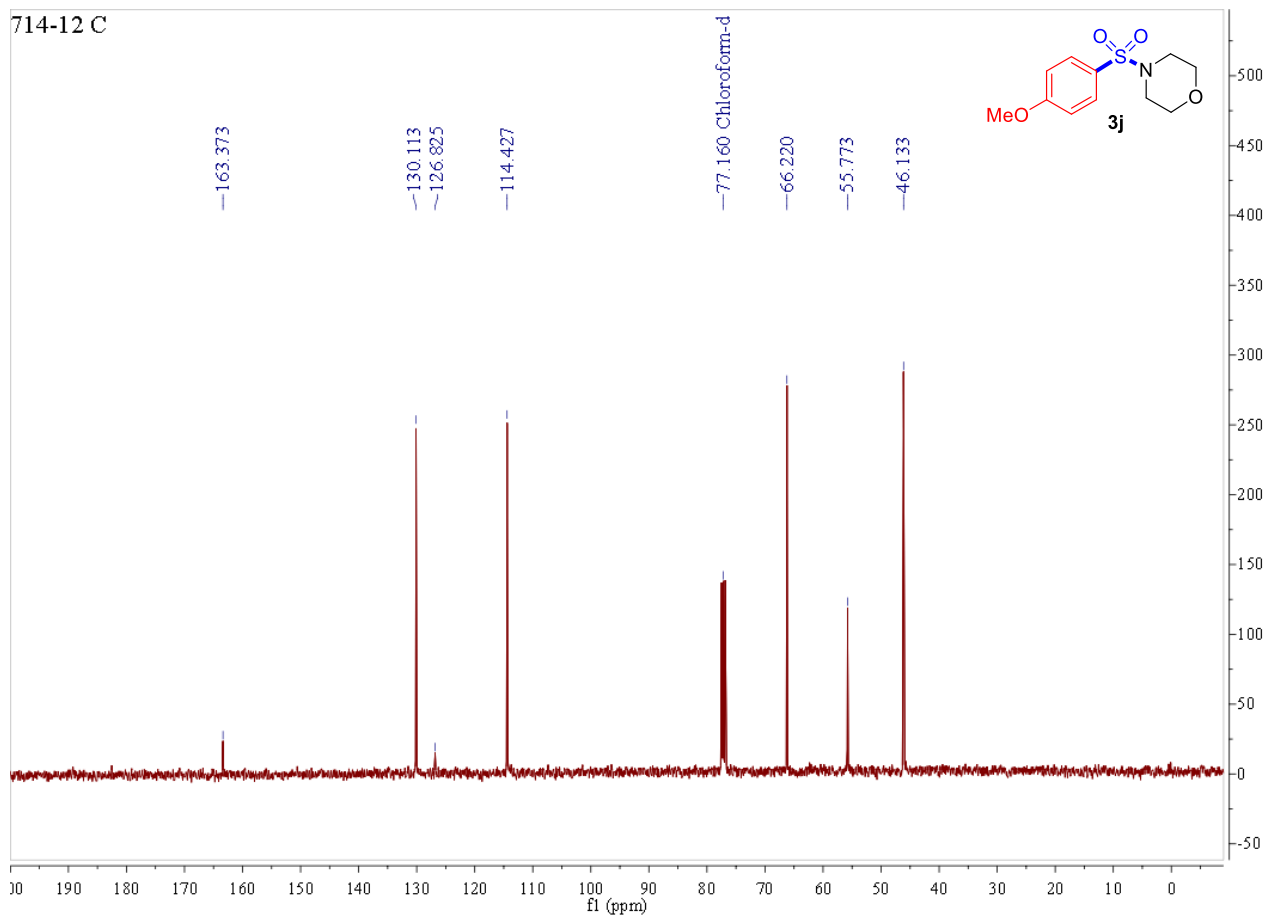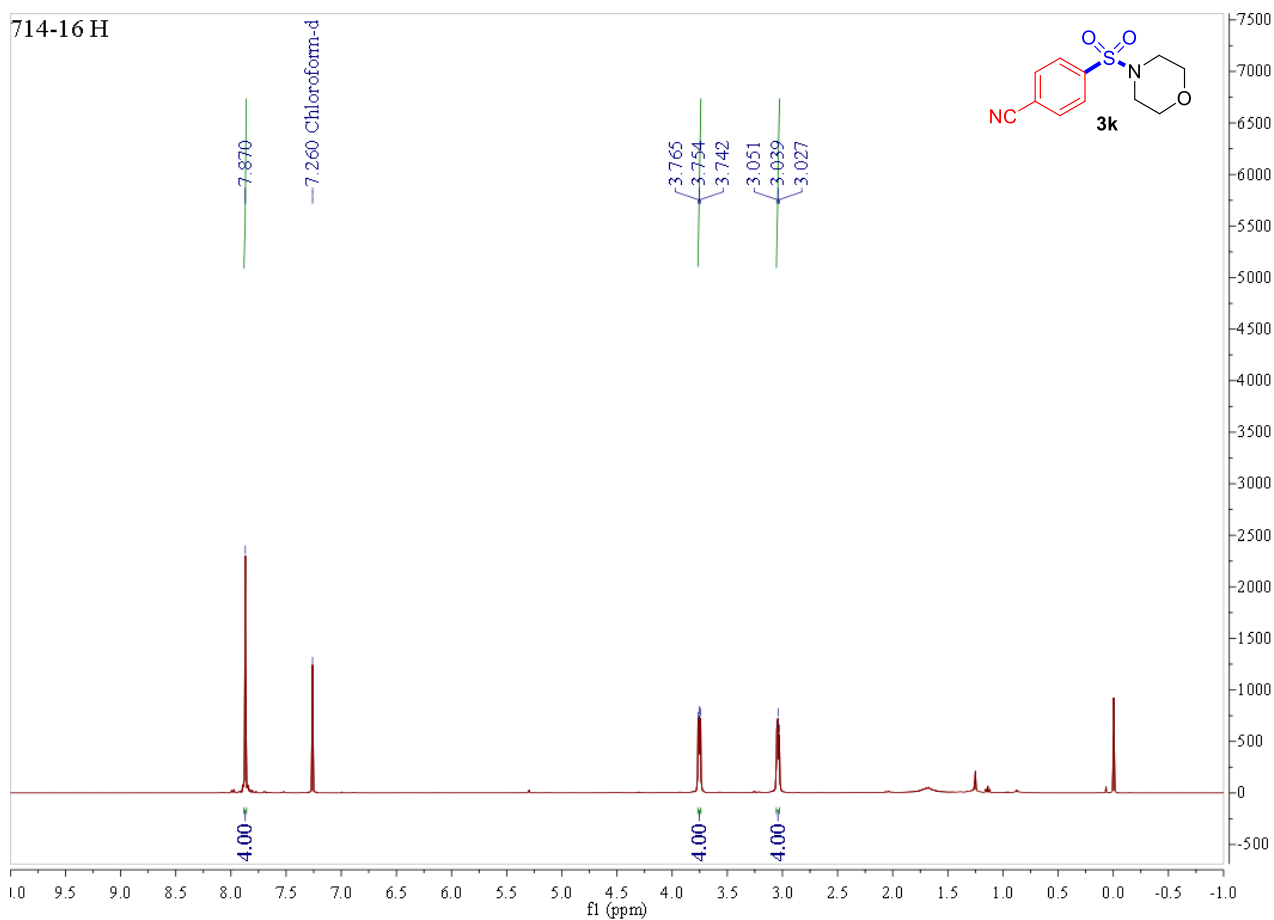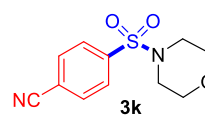

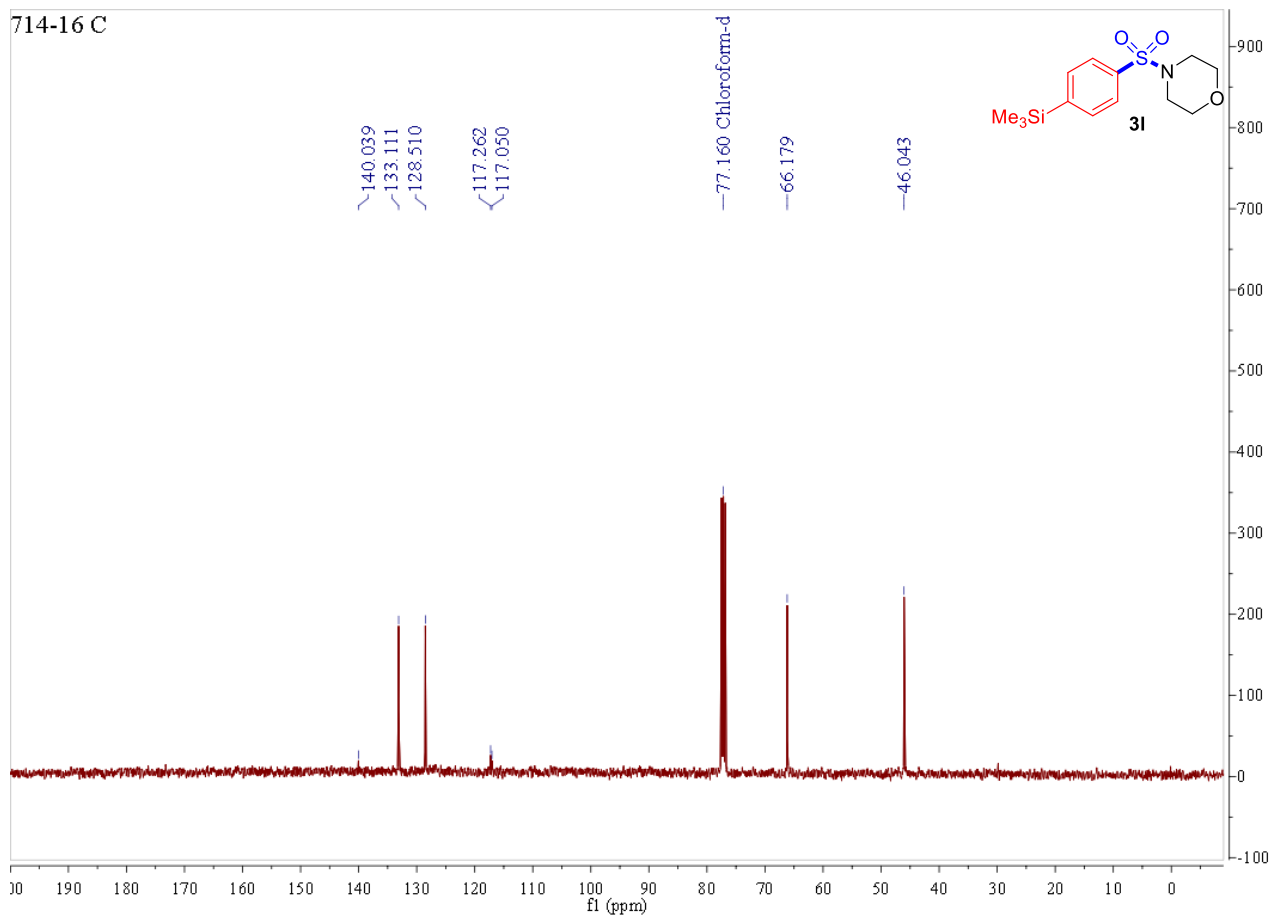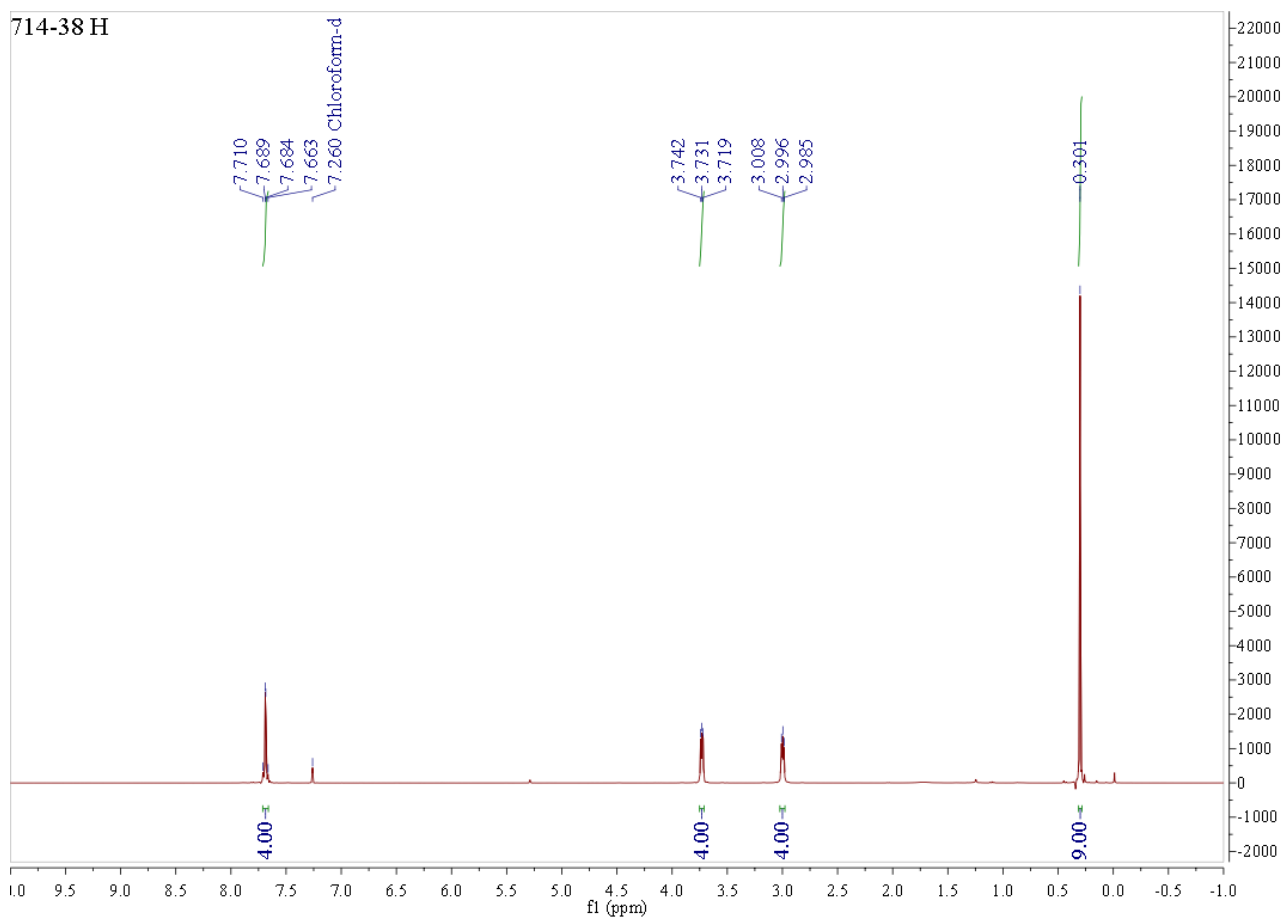

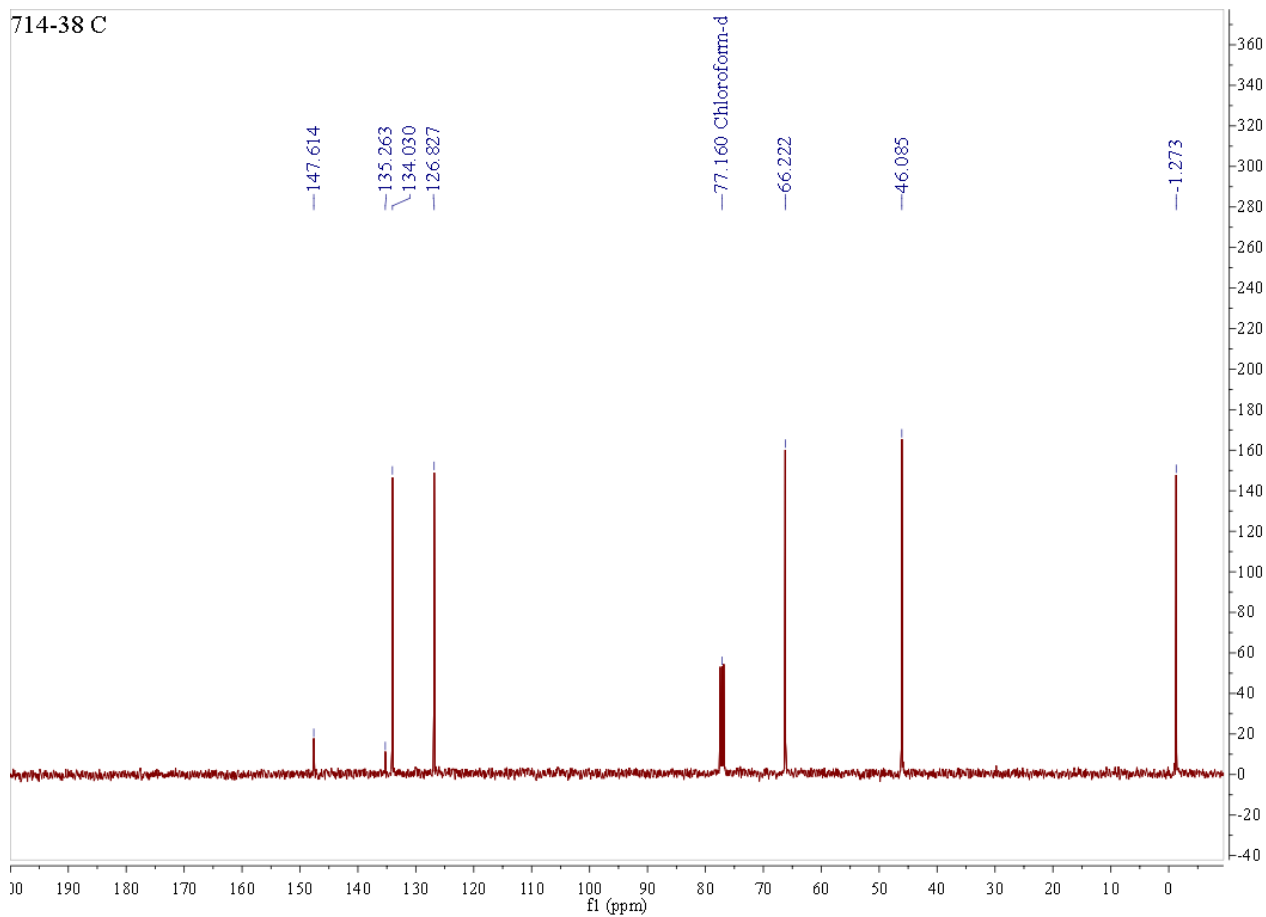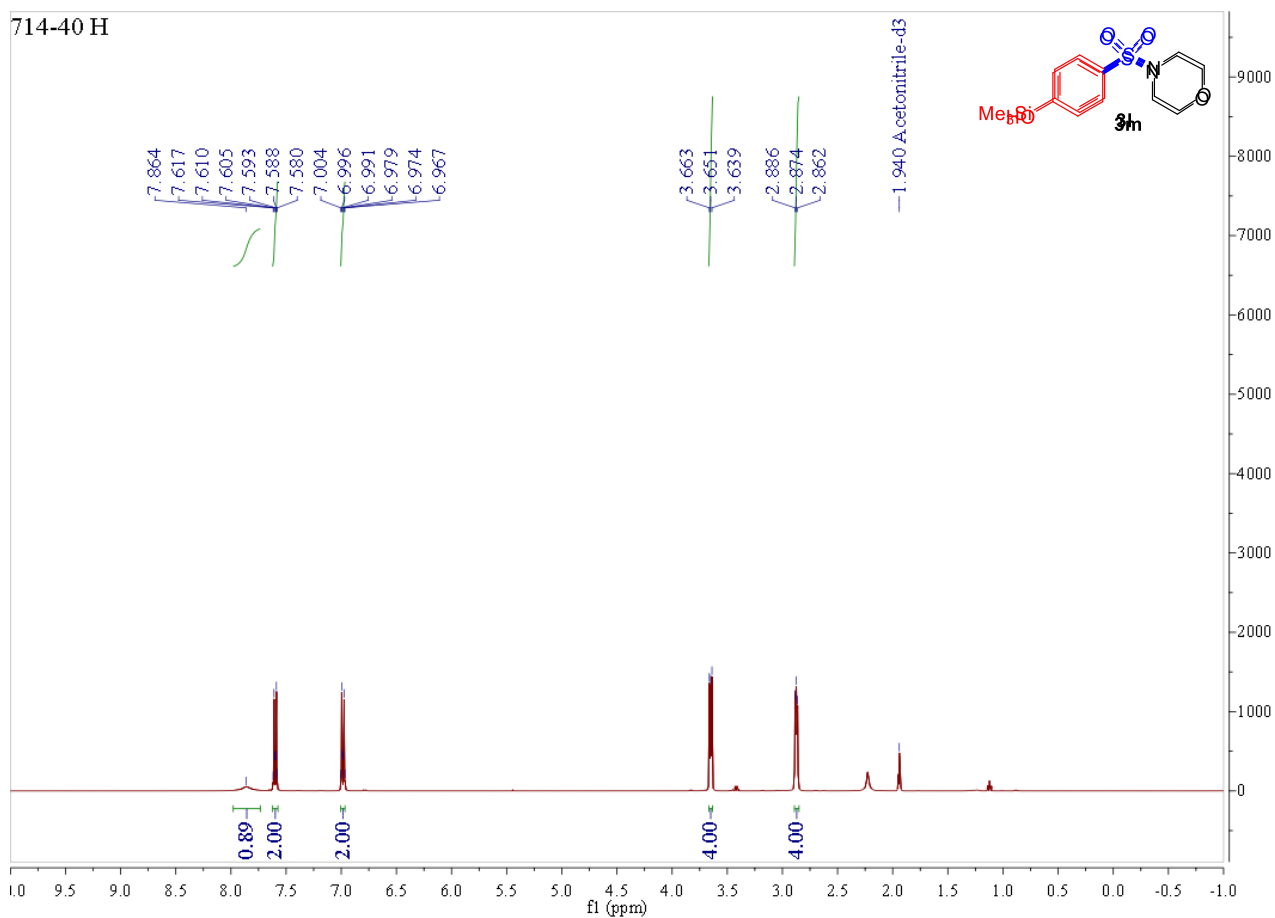

S38

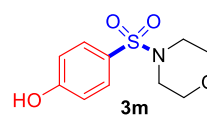

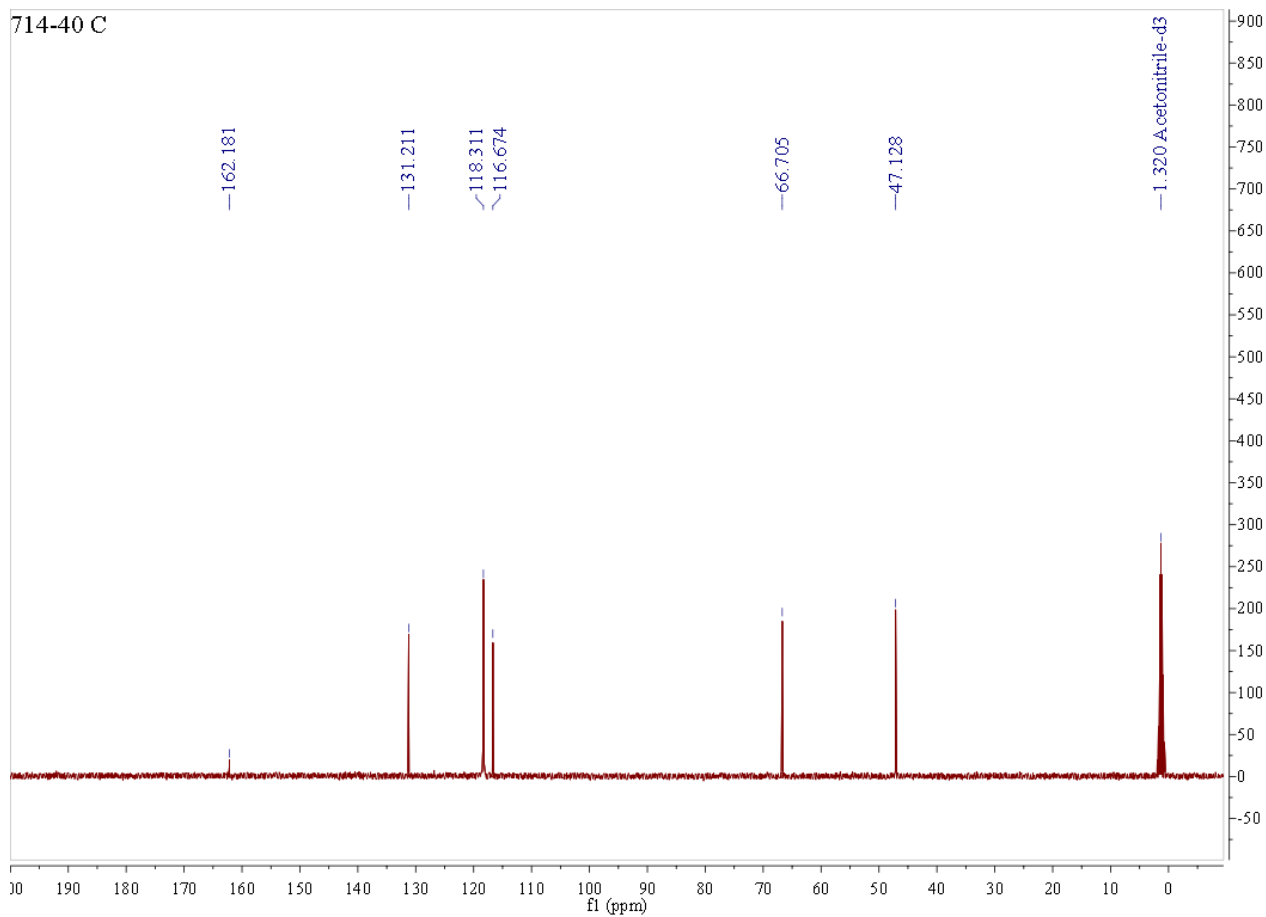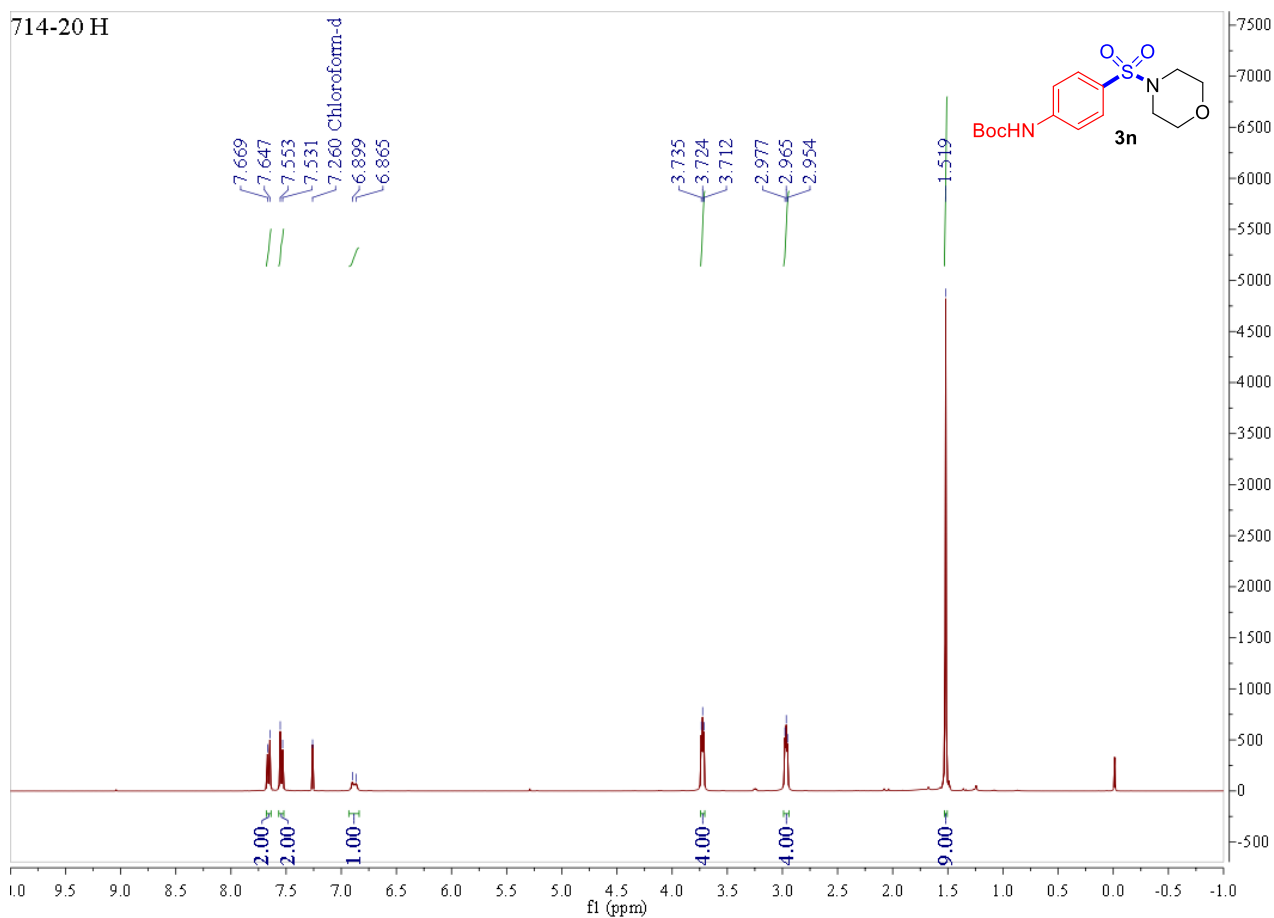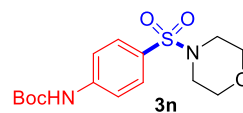

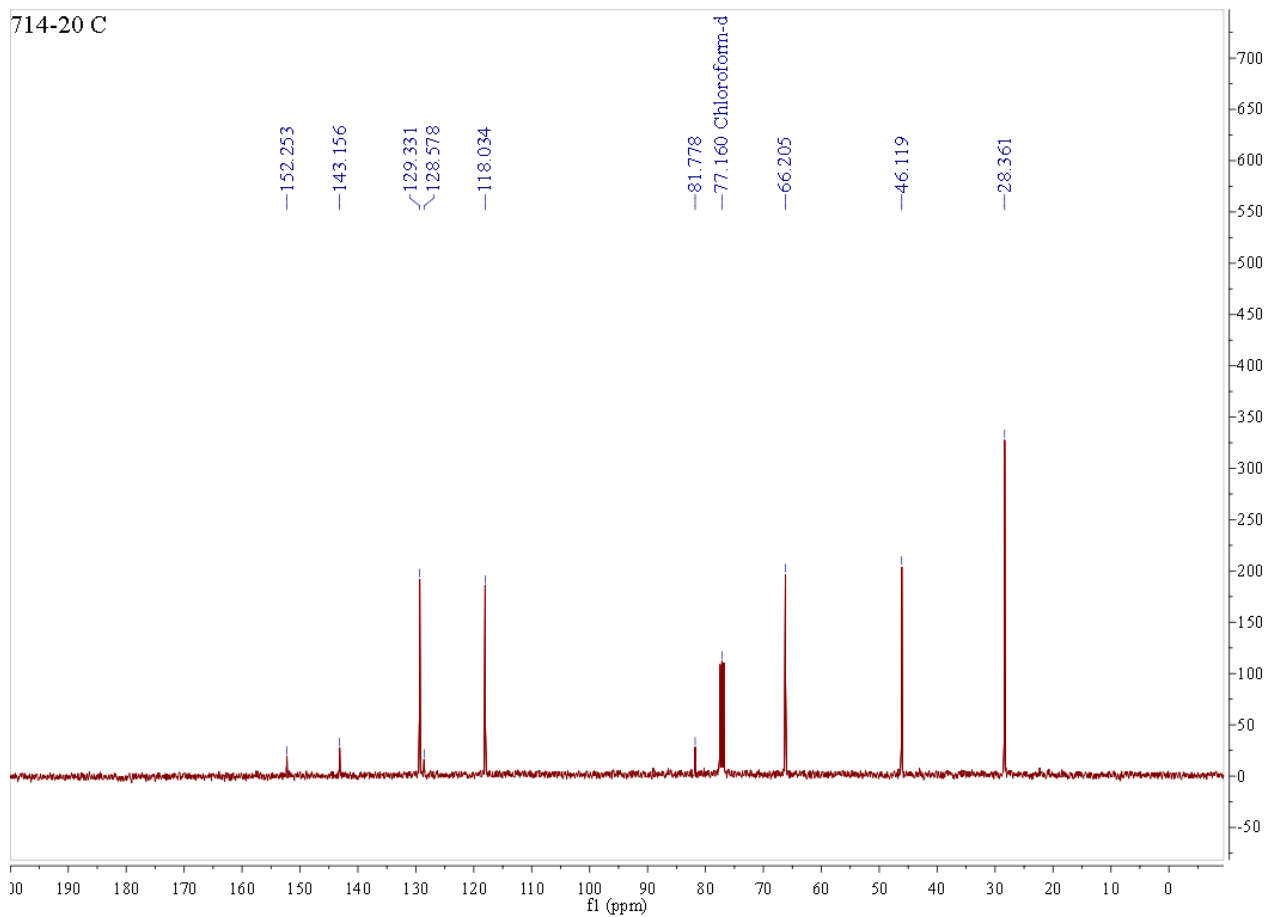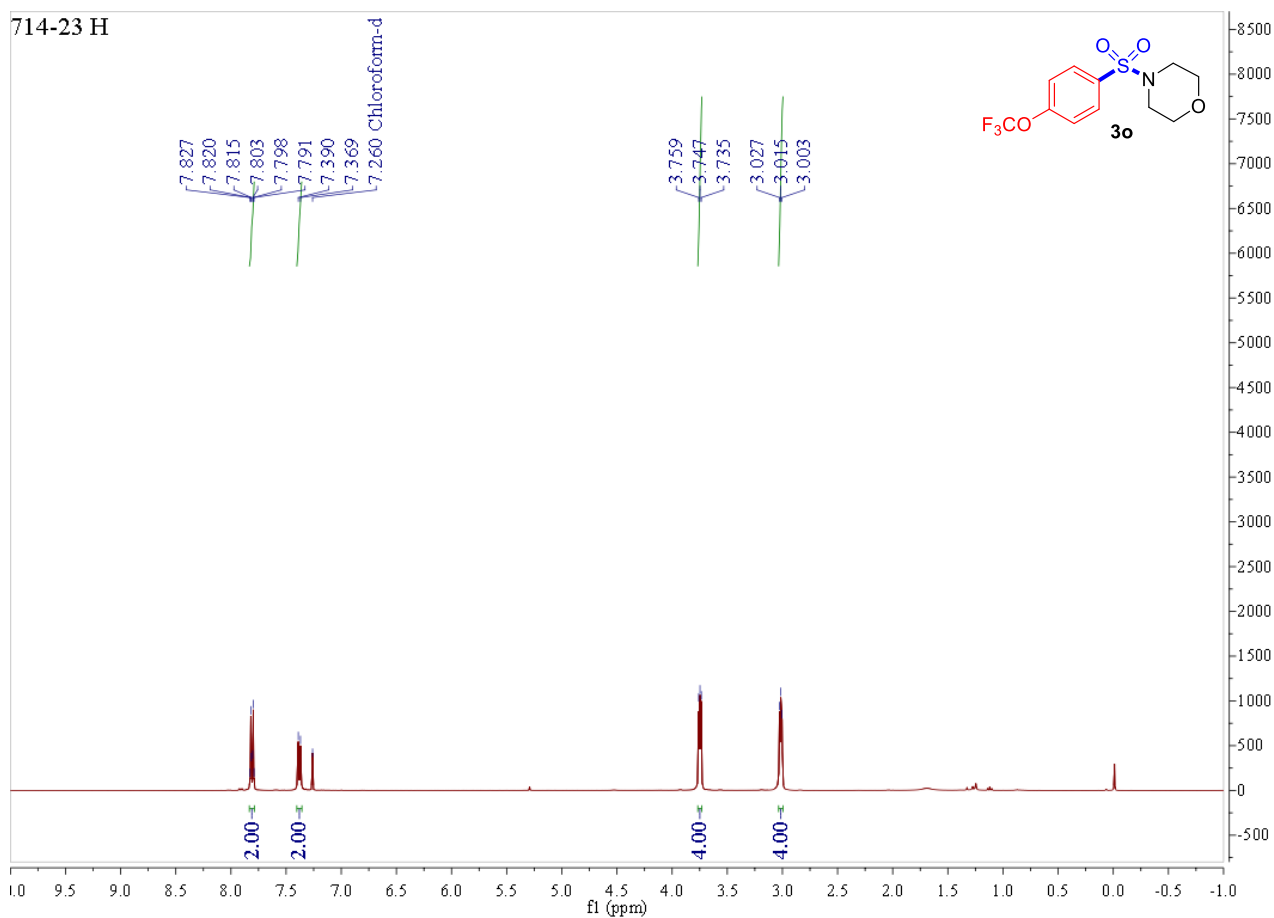

S40

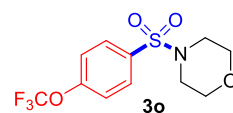



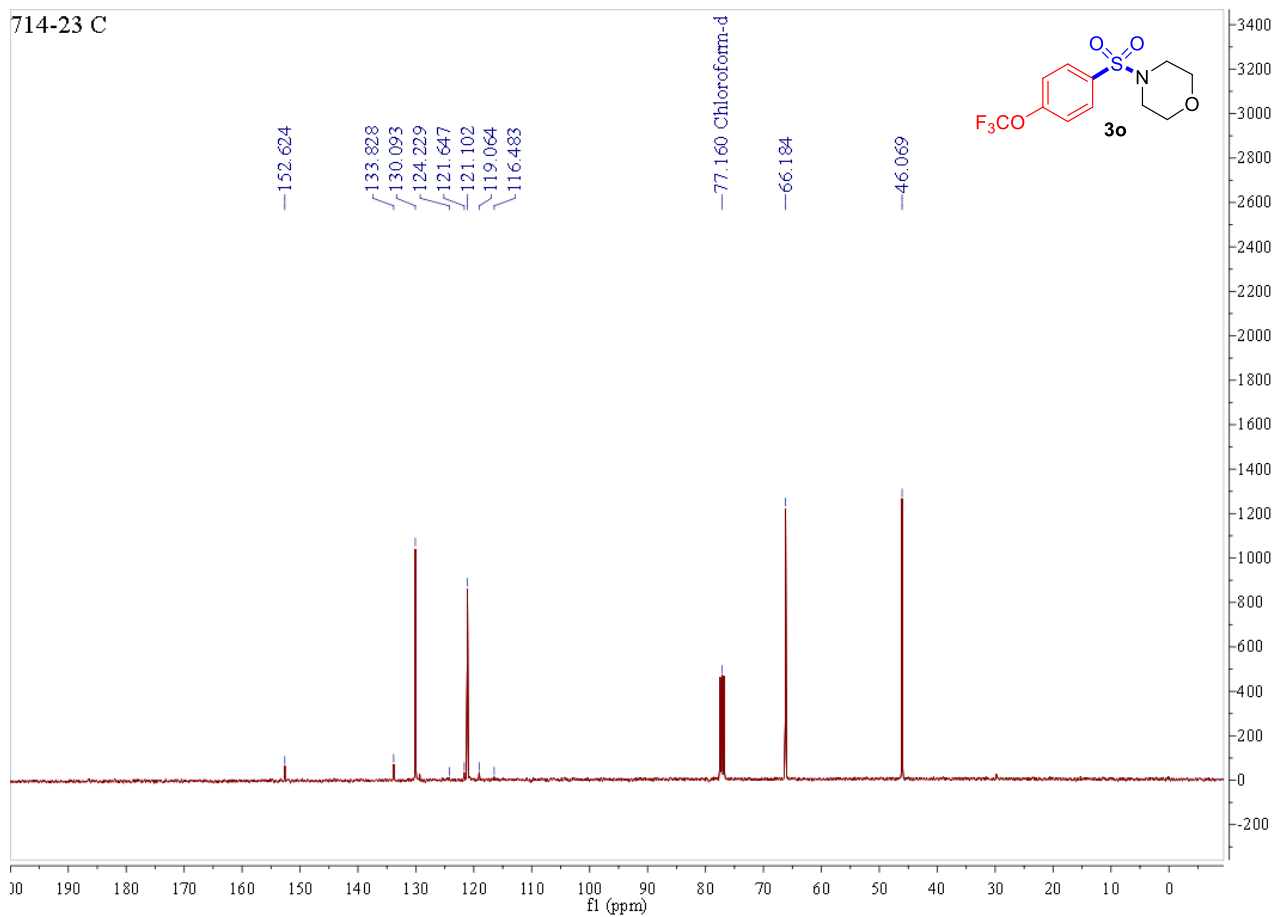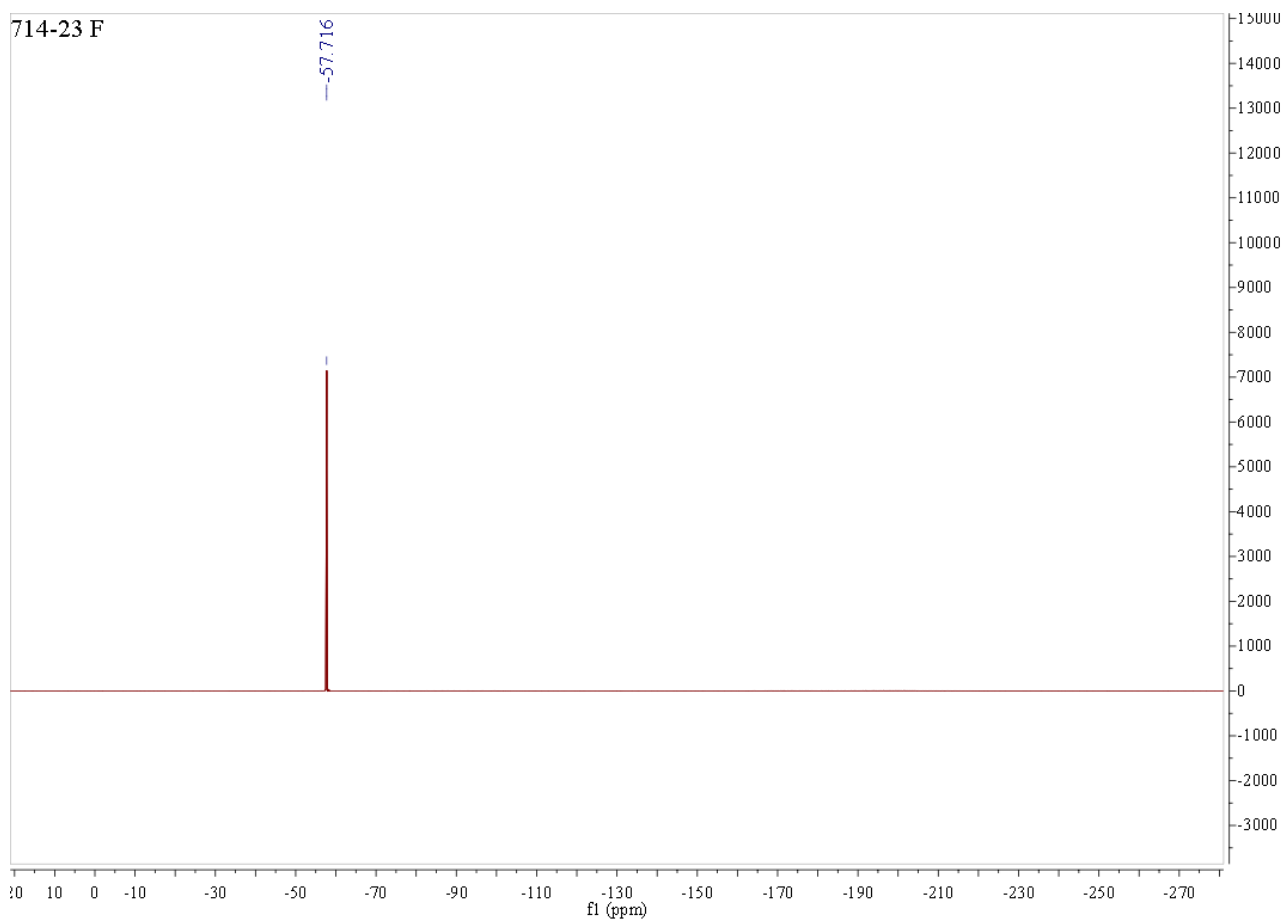



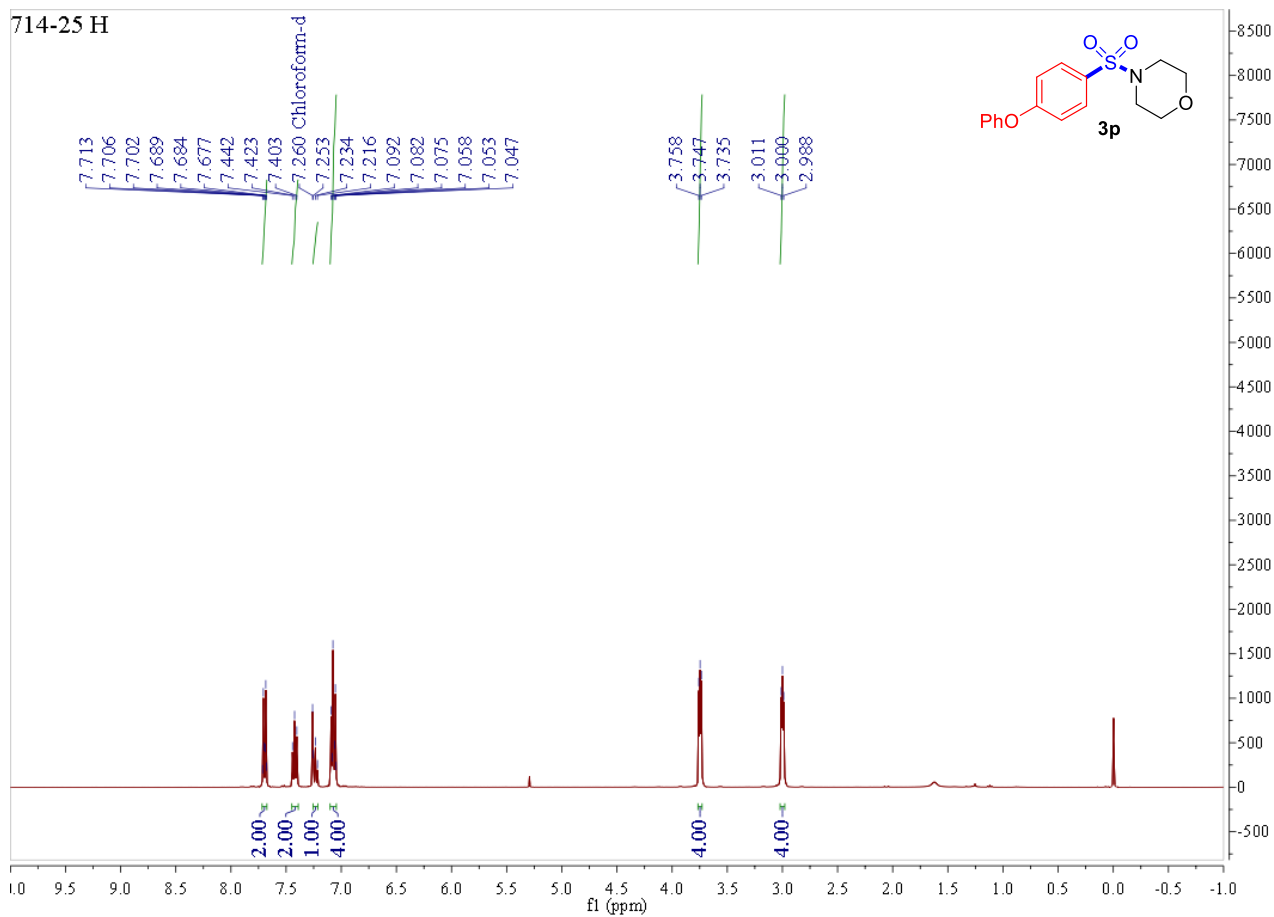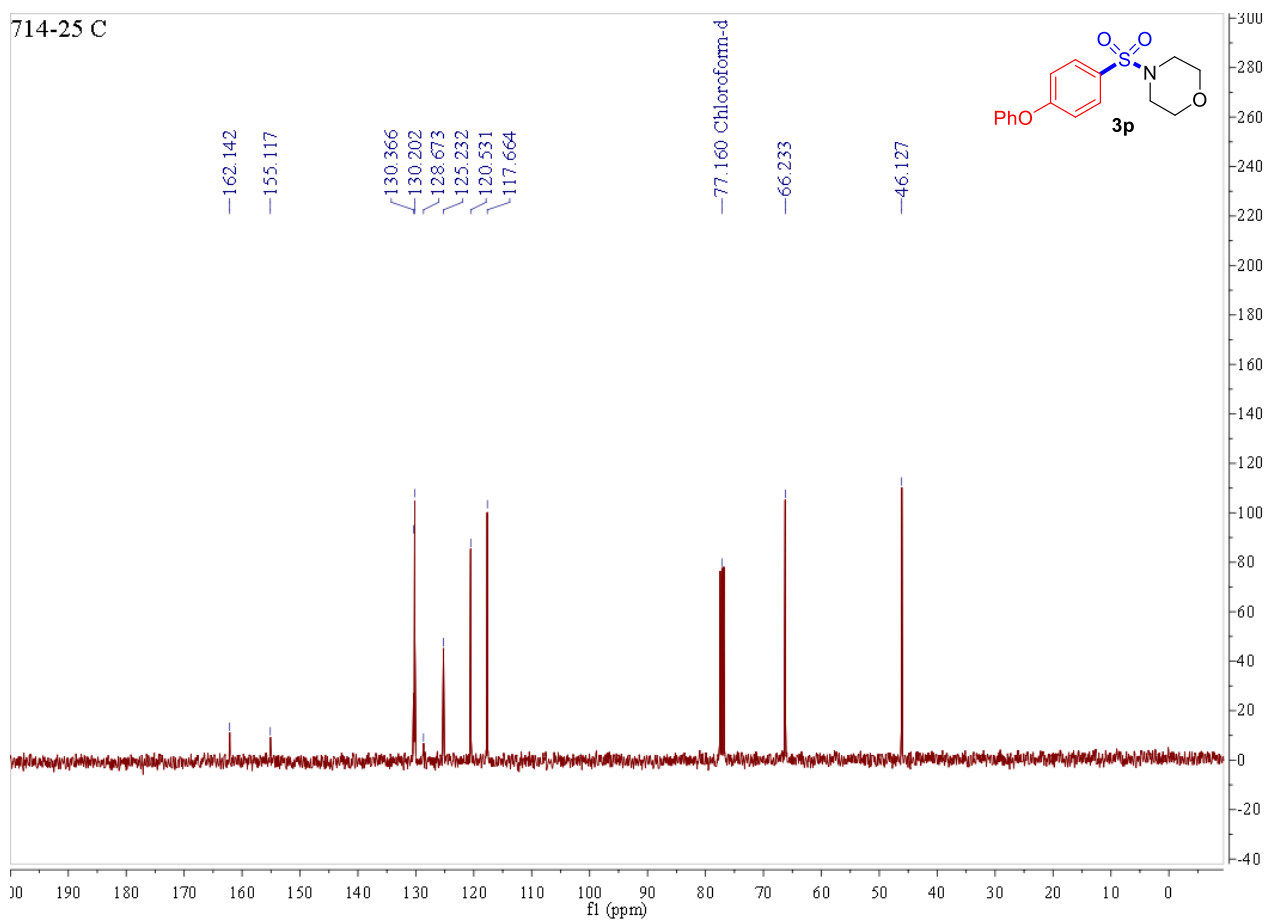

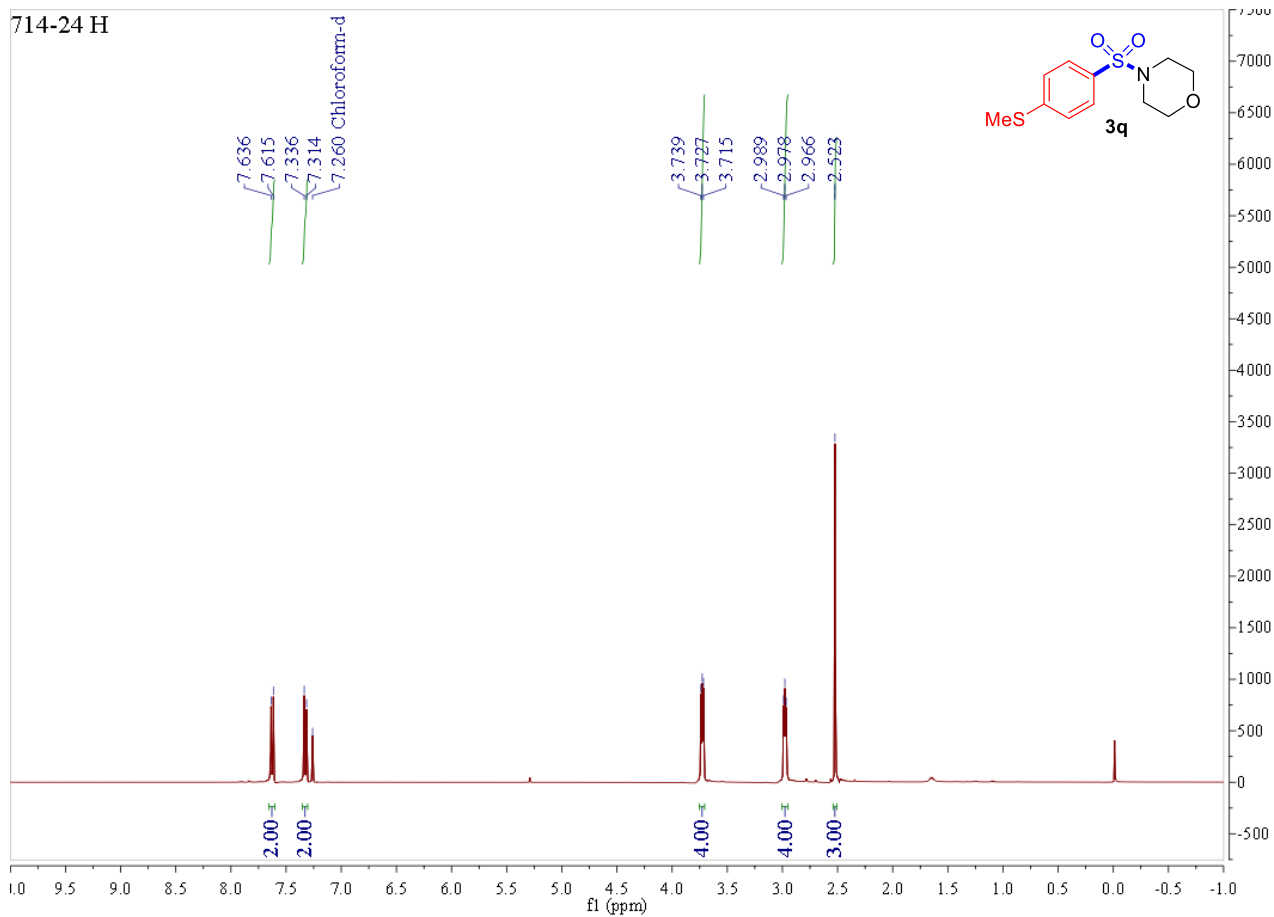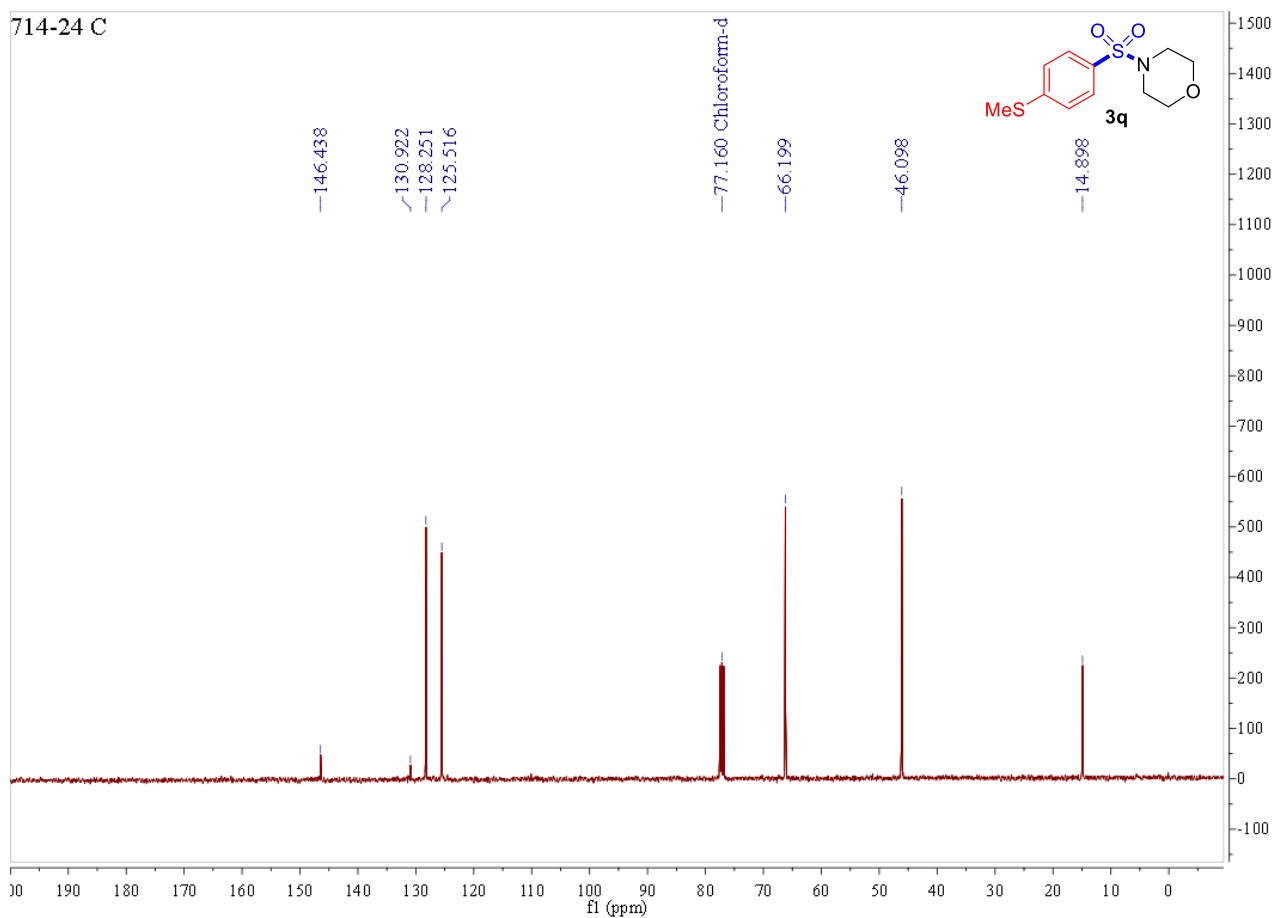

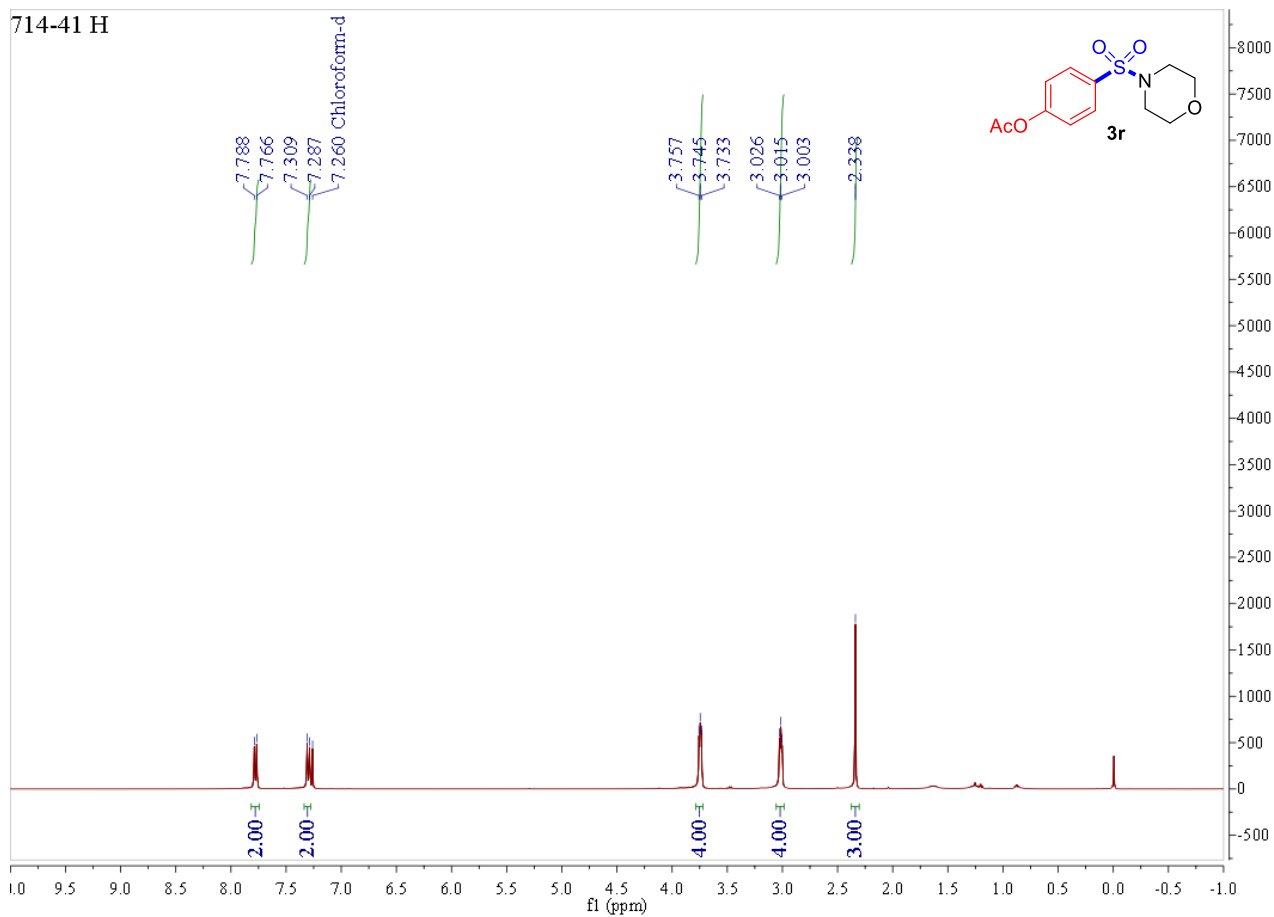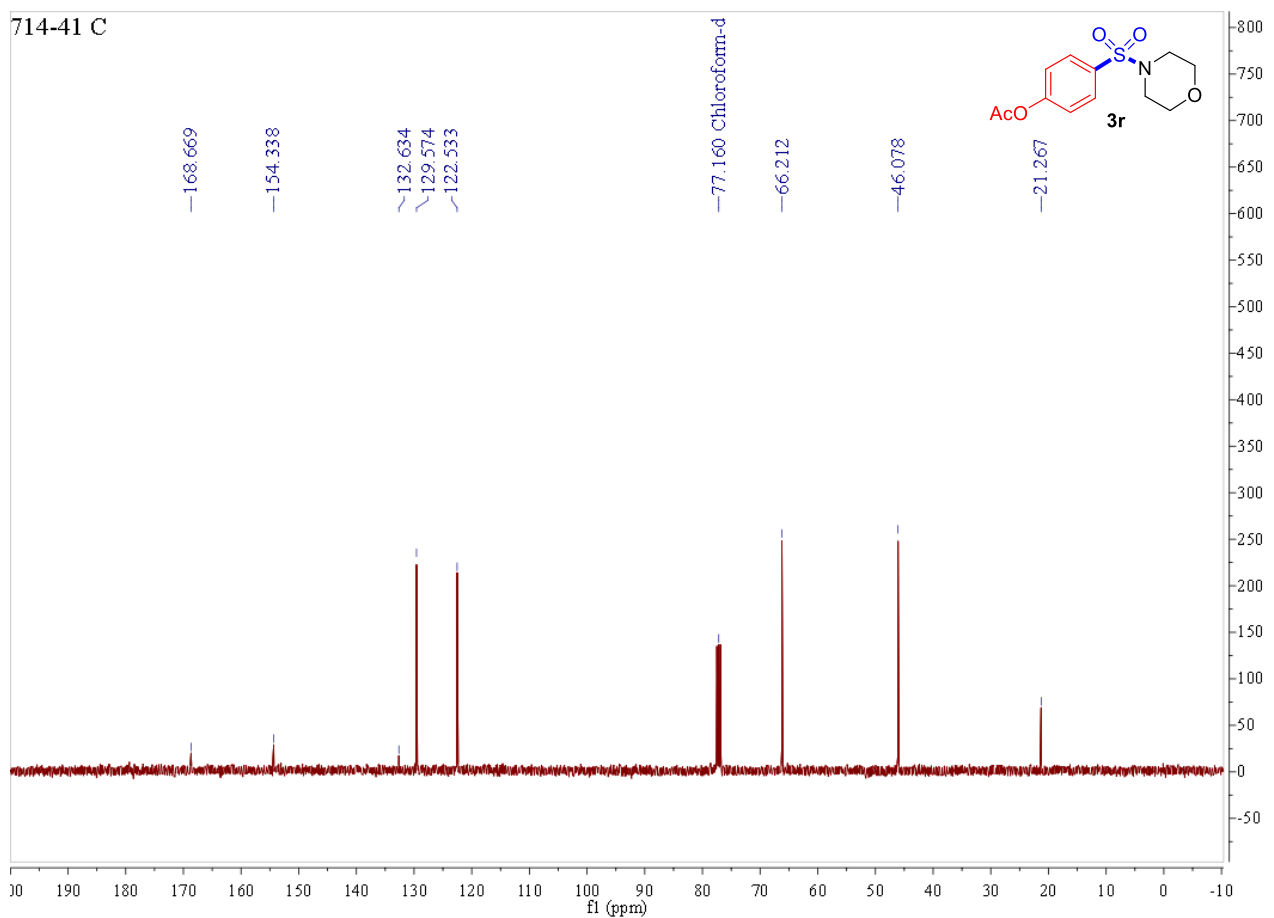

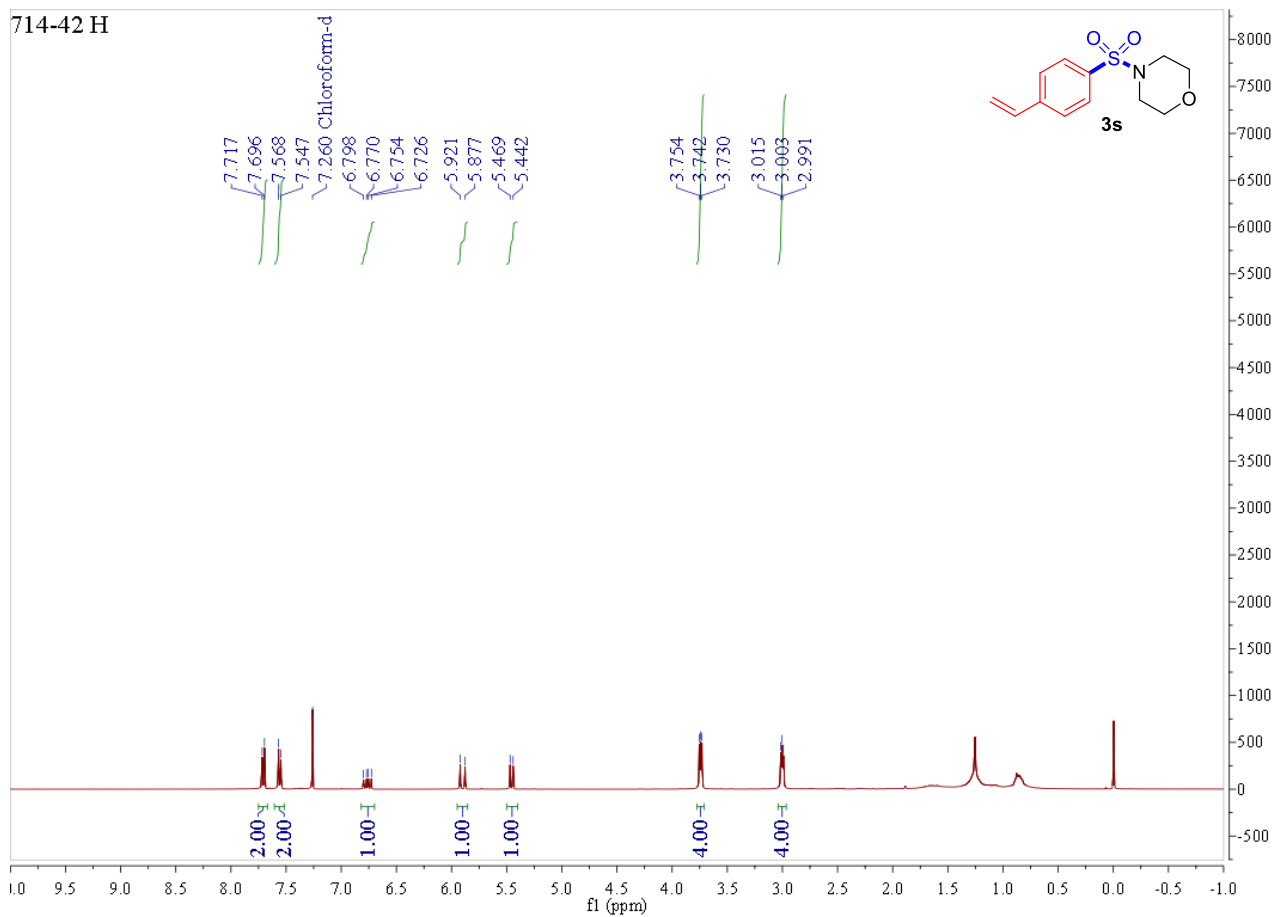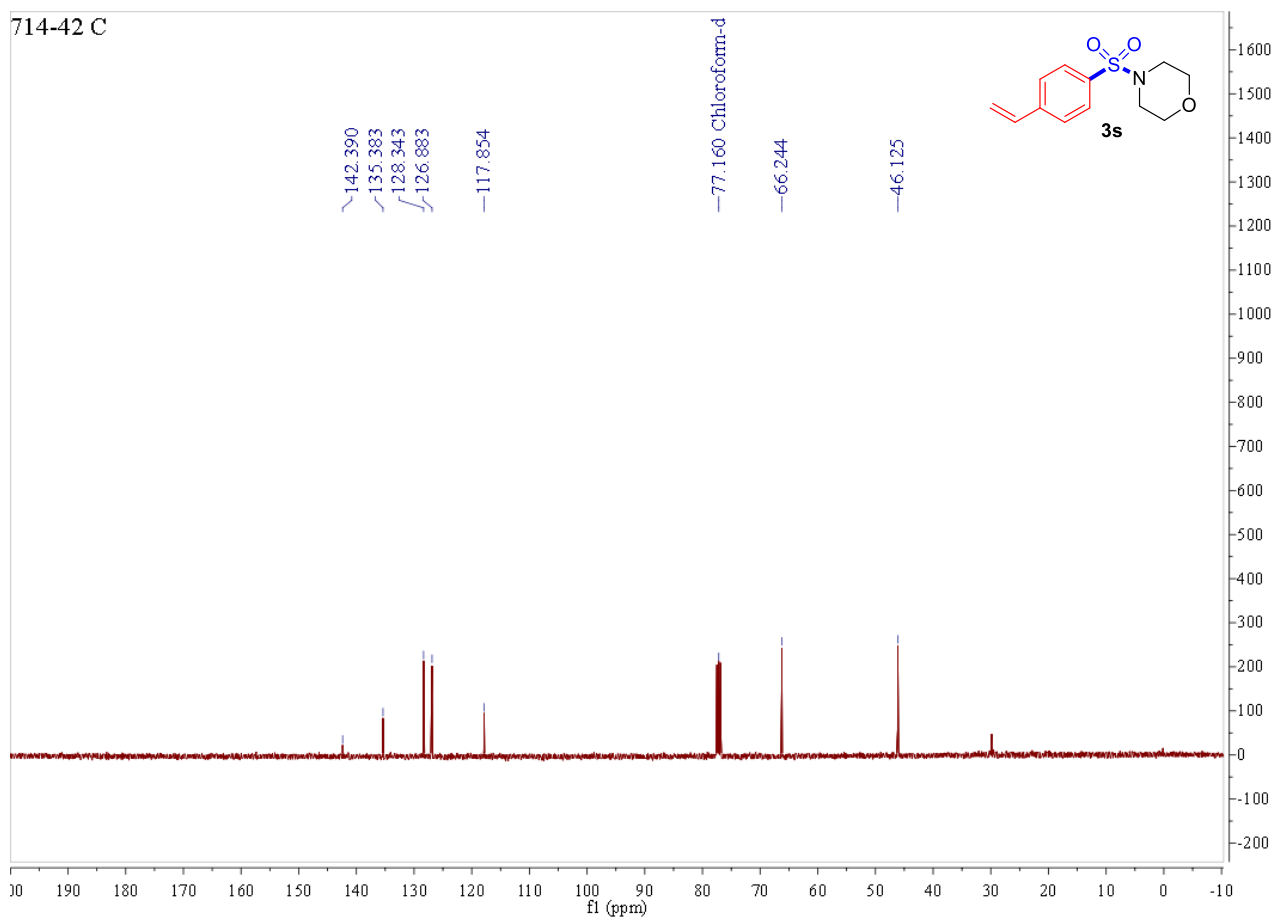

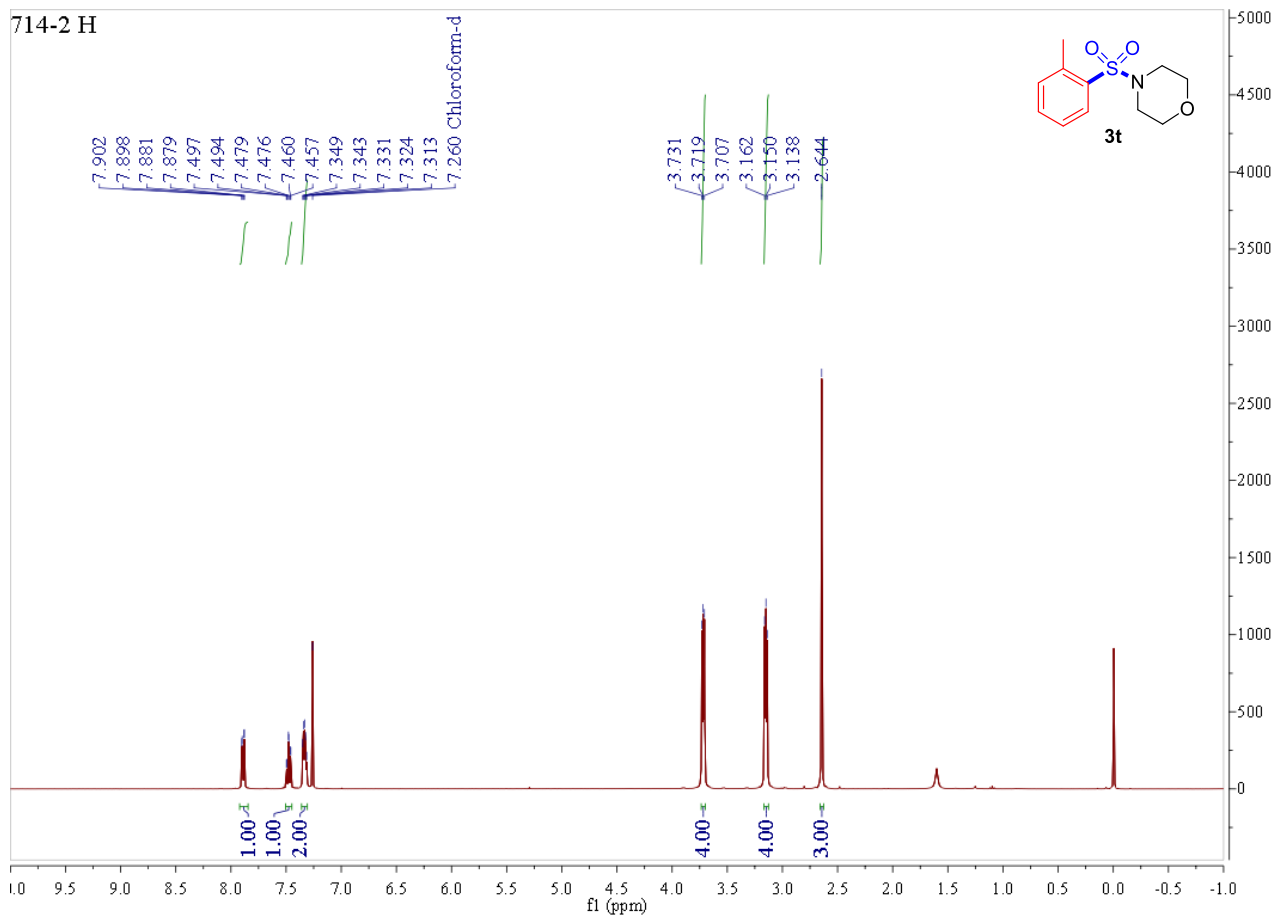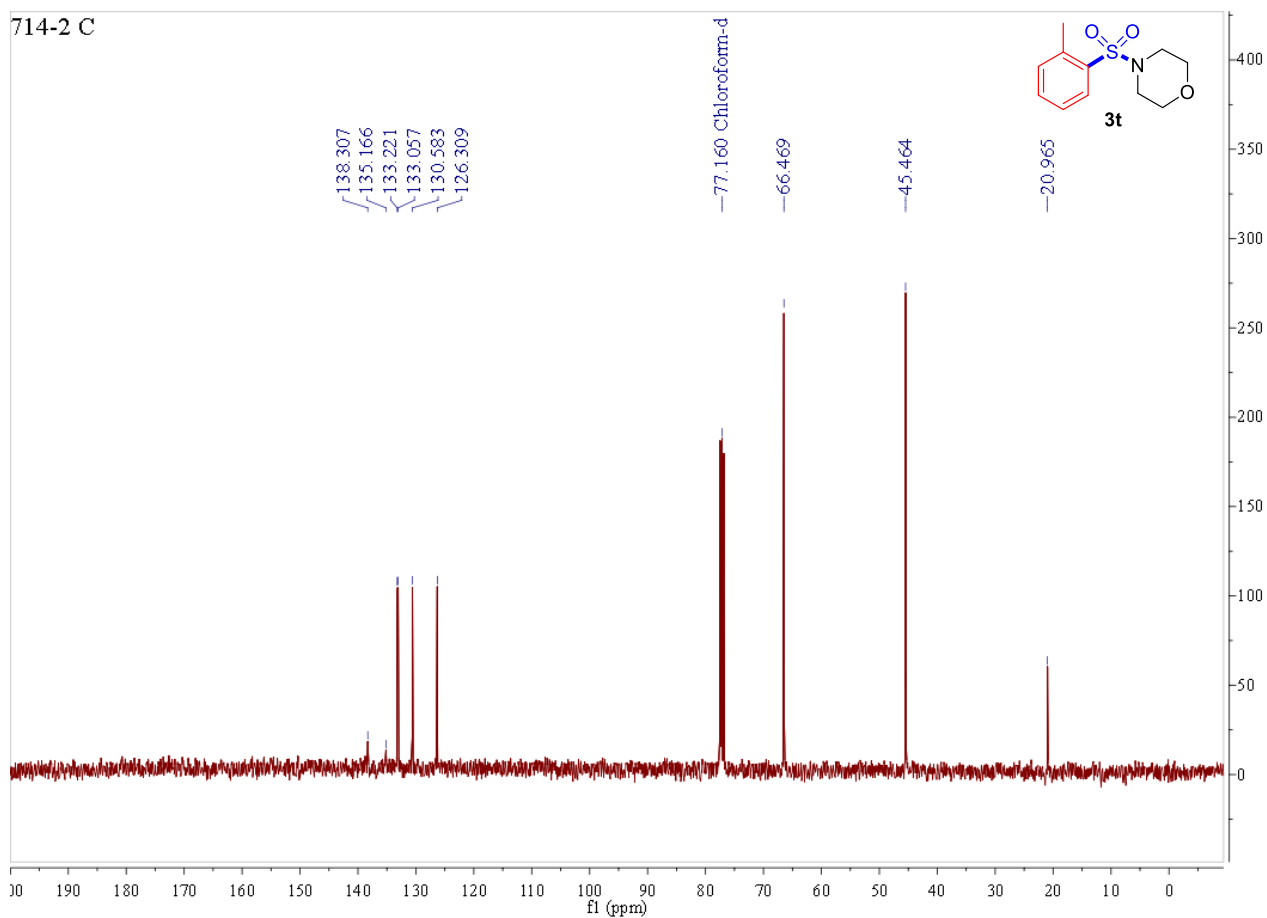

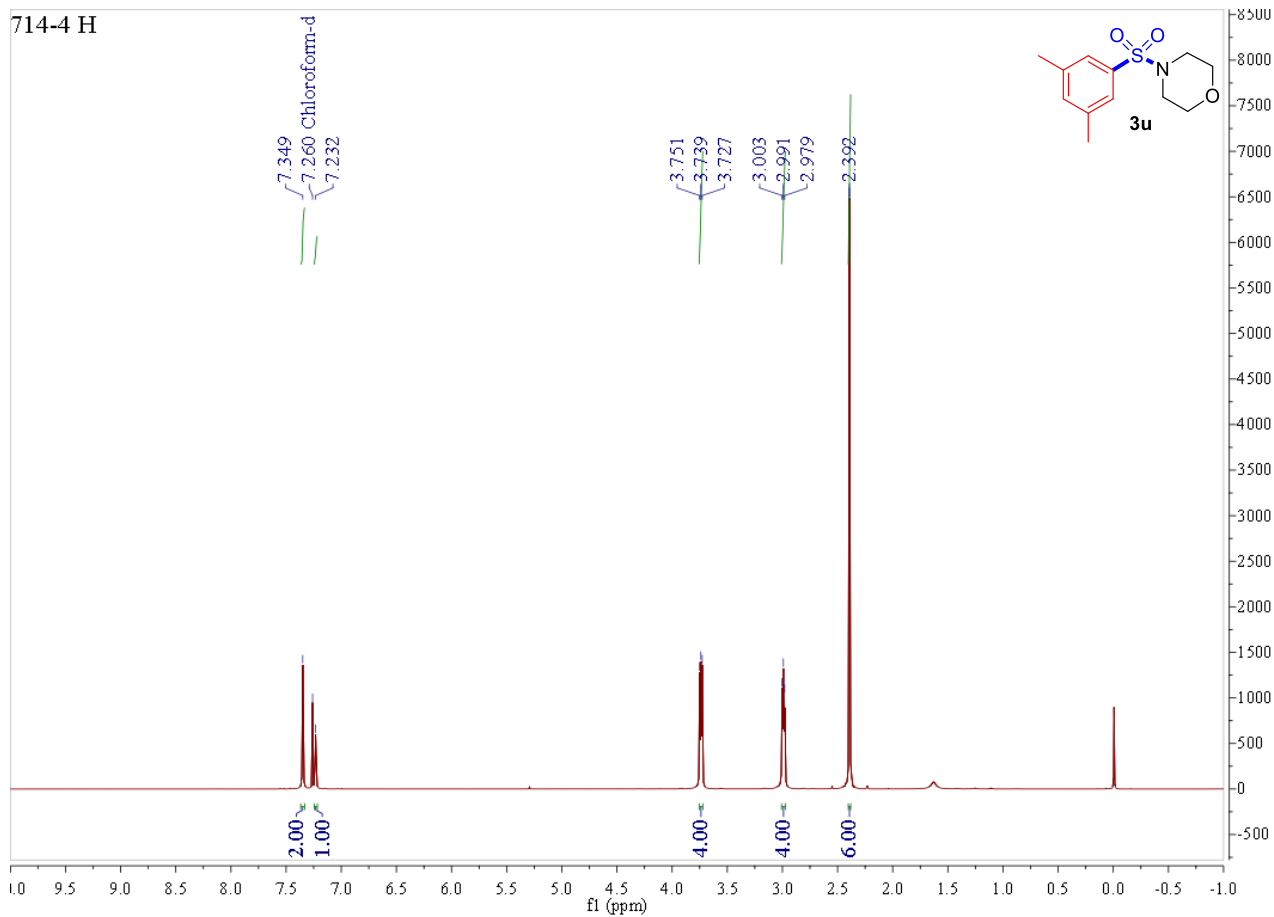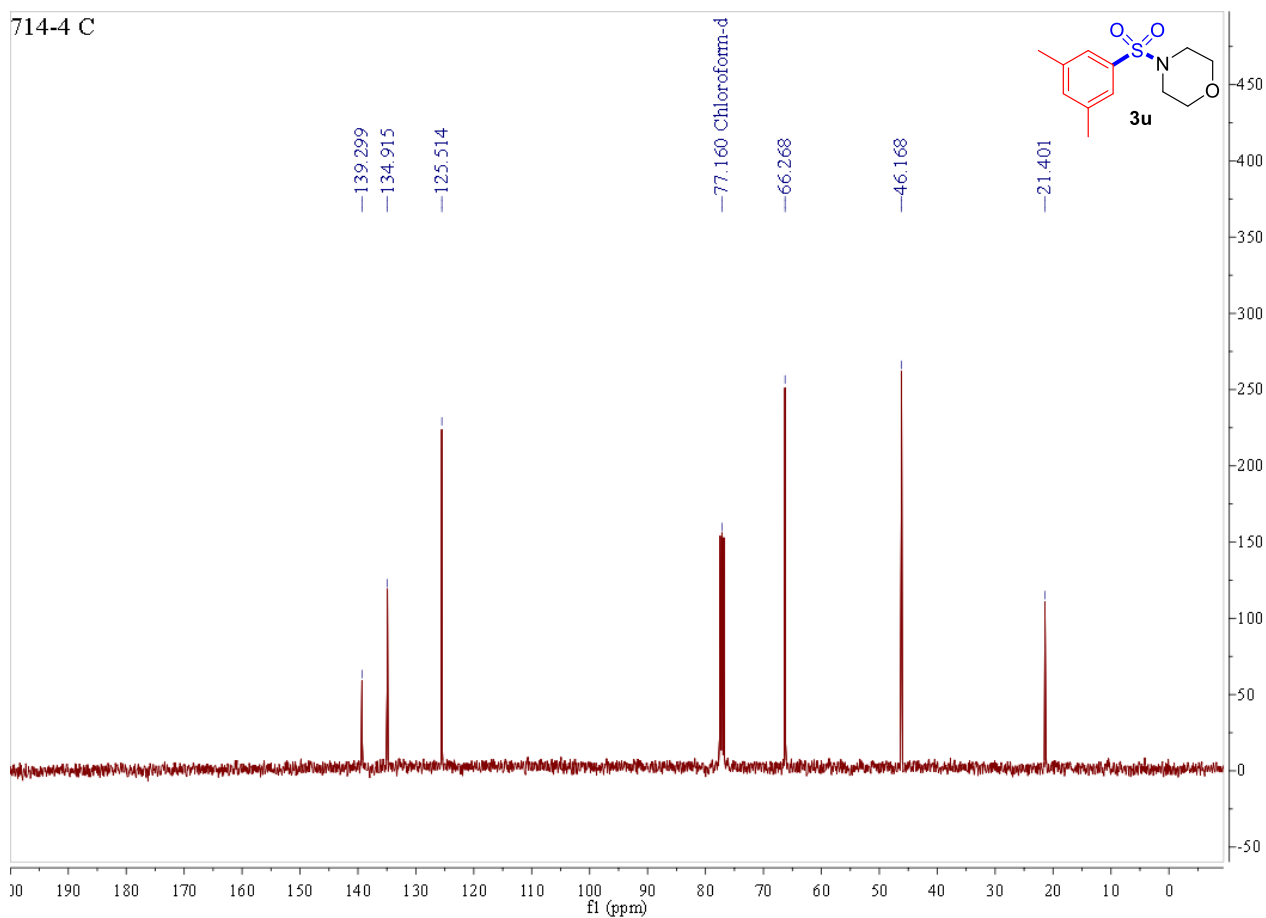



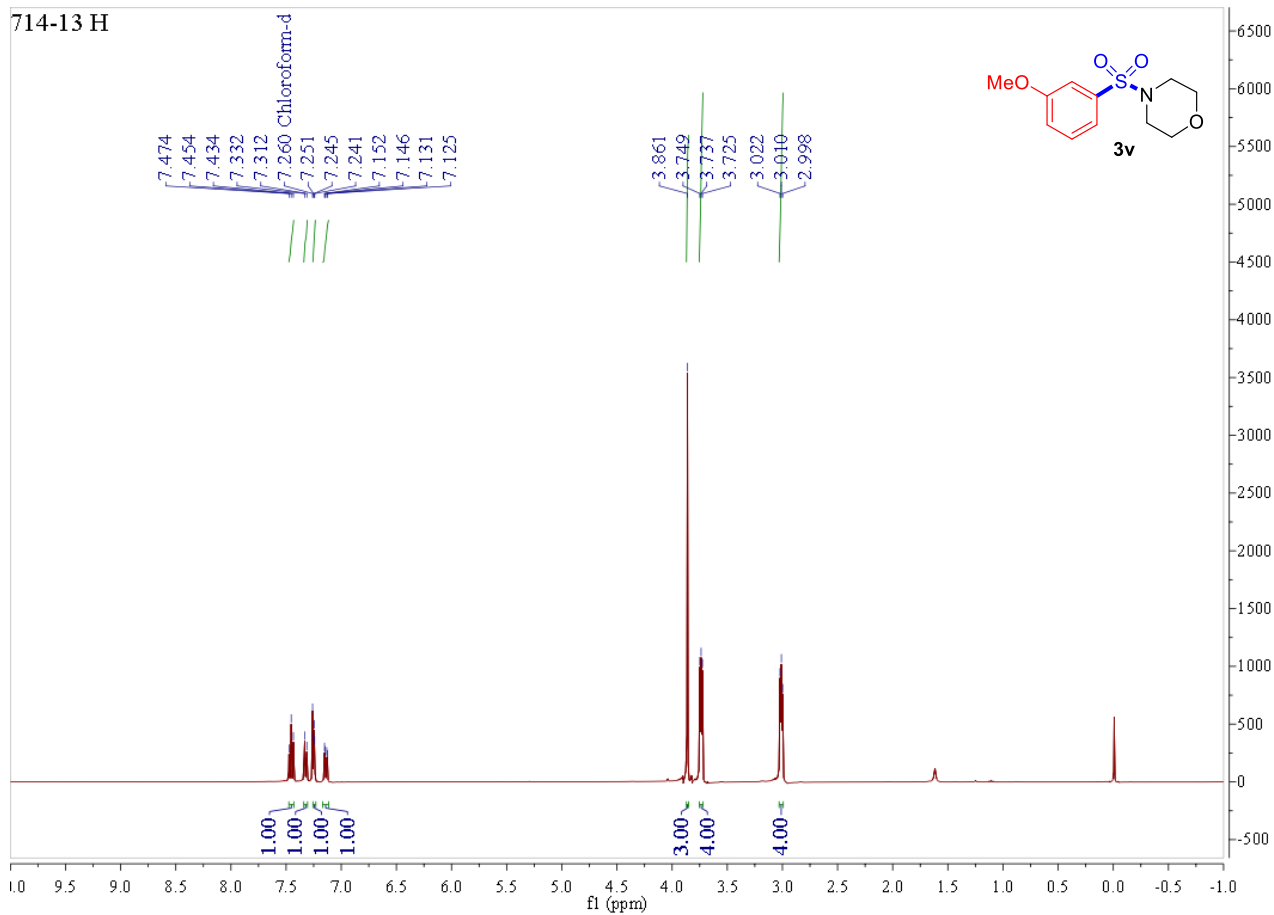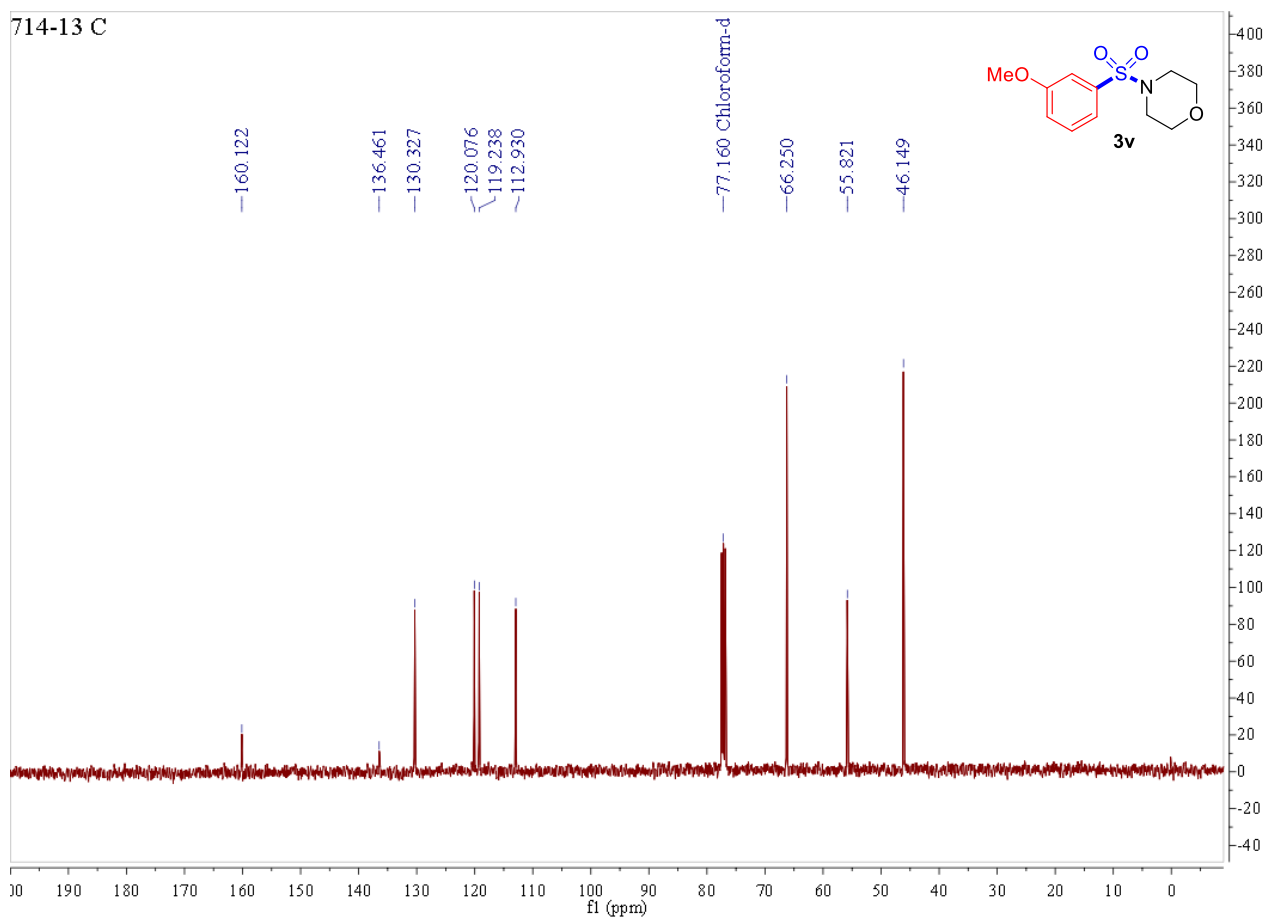

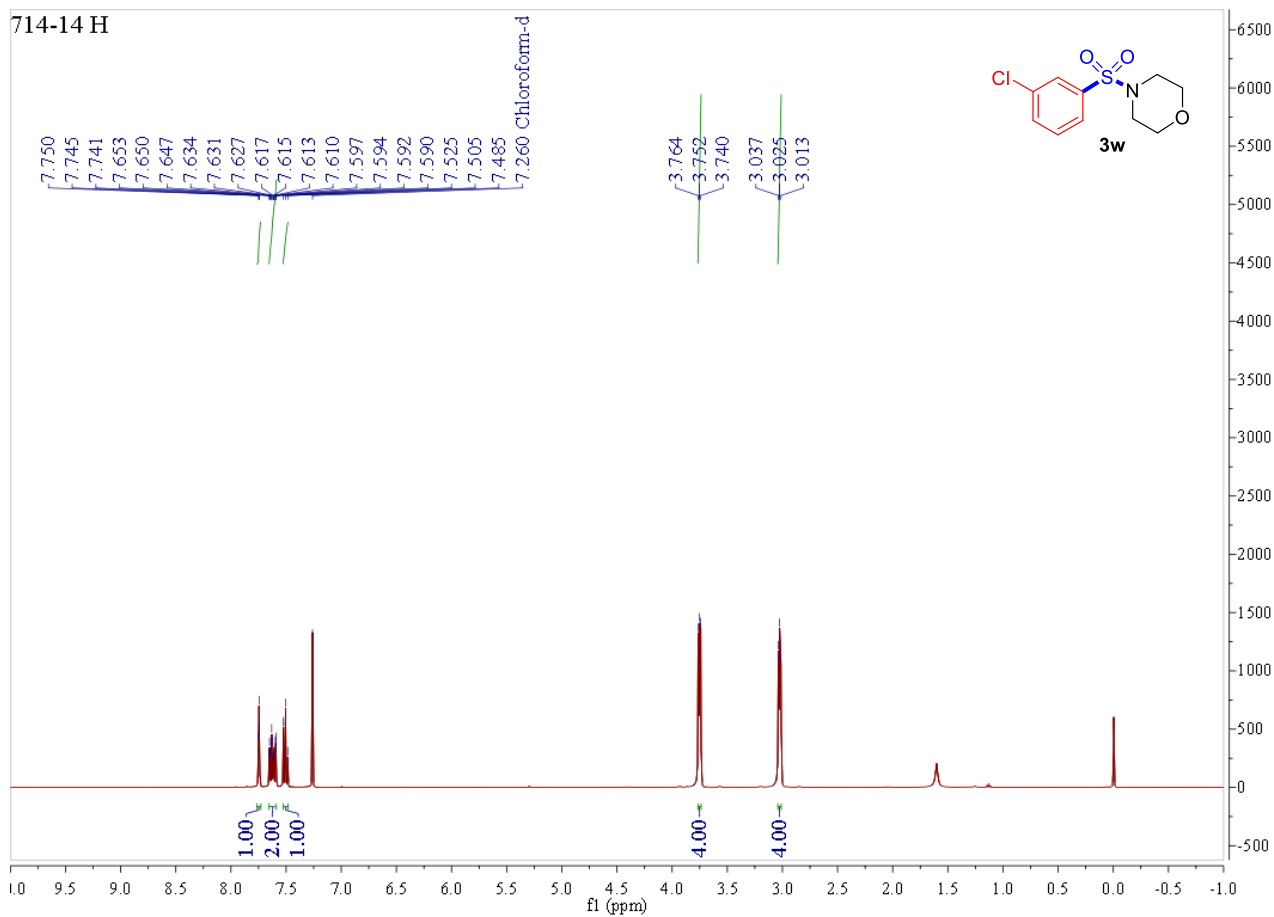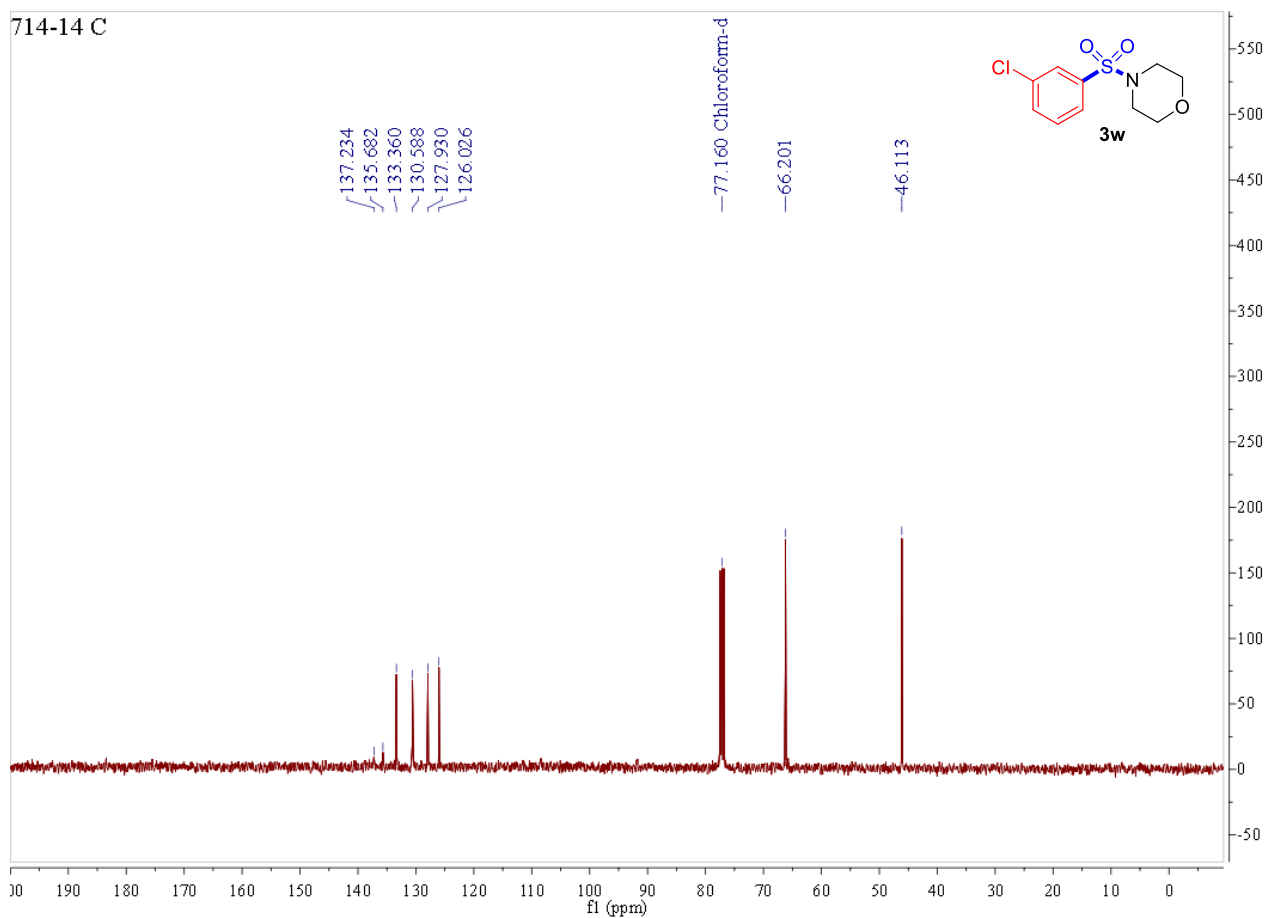

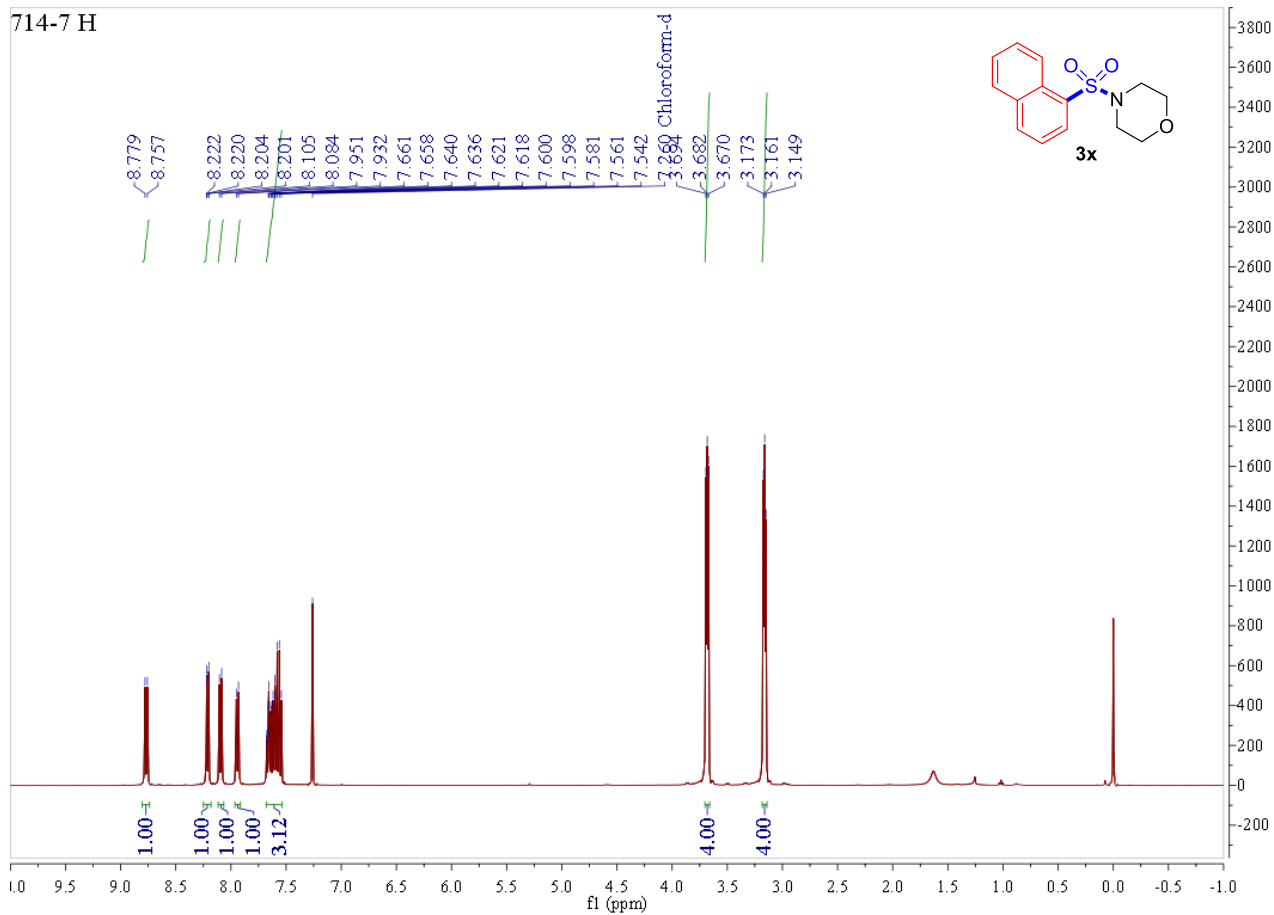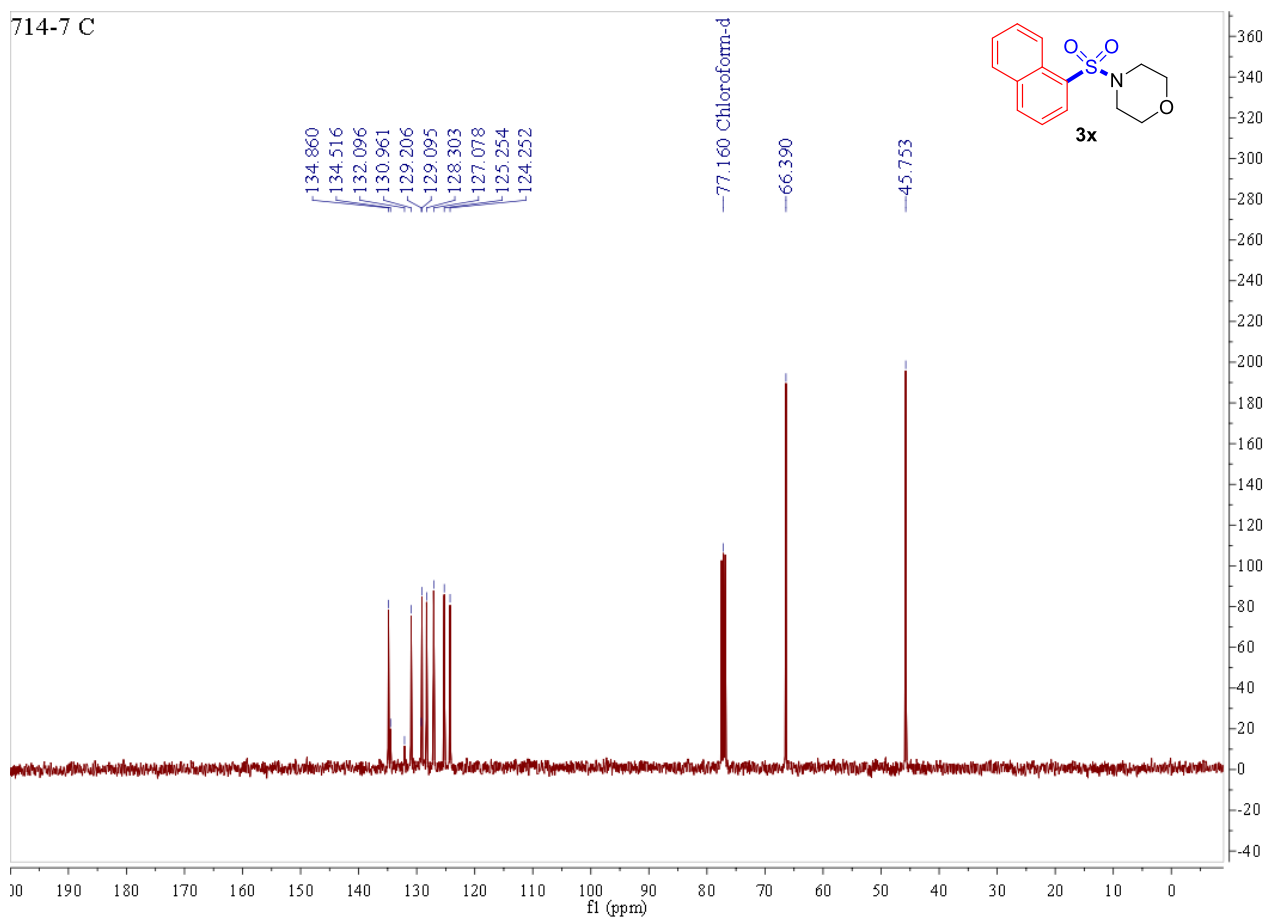

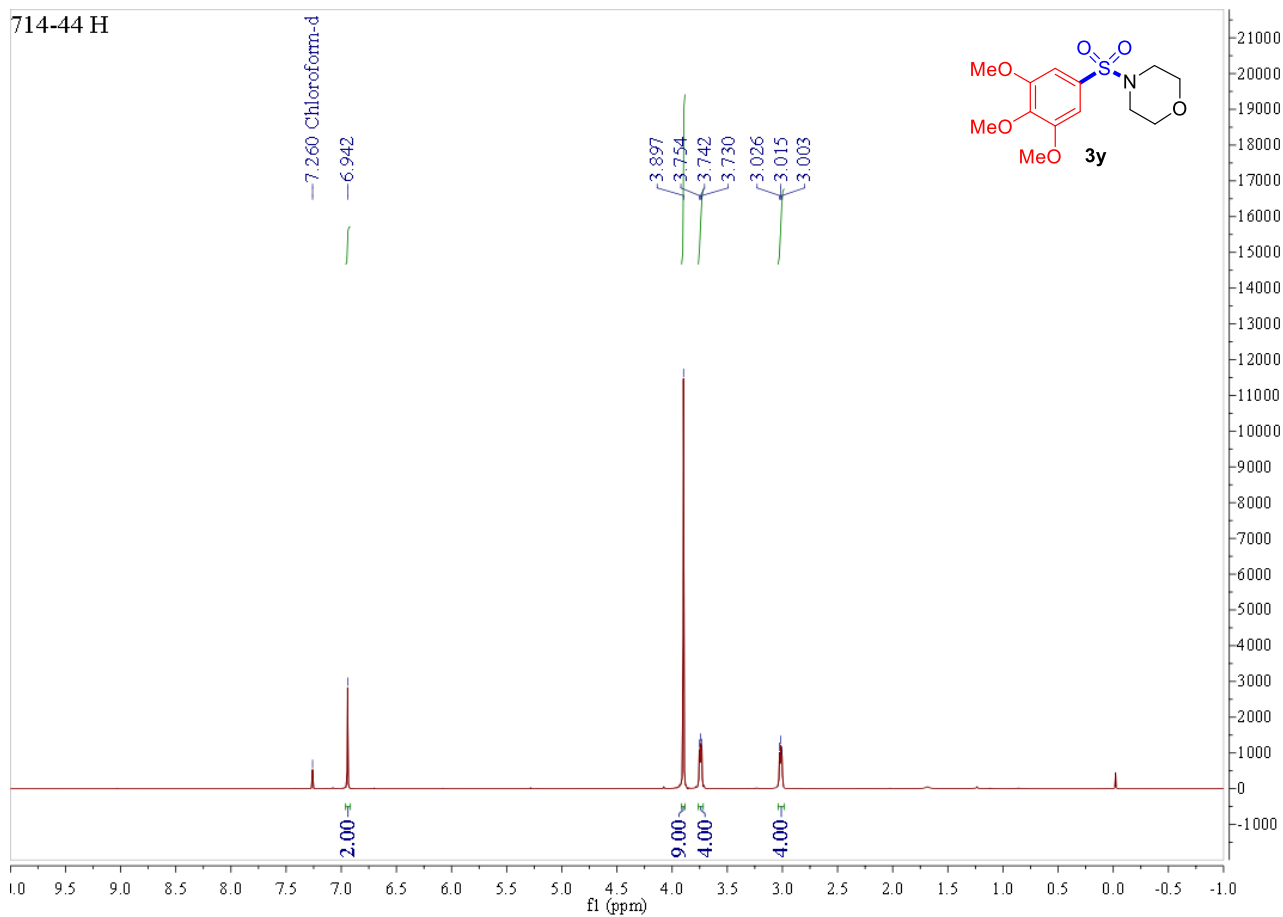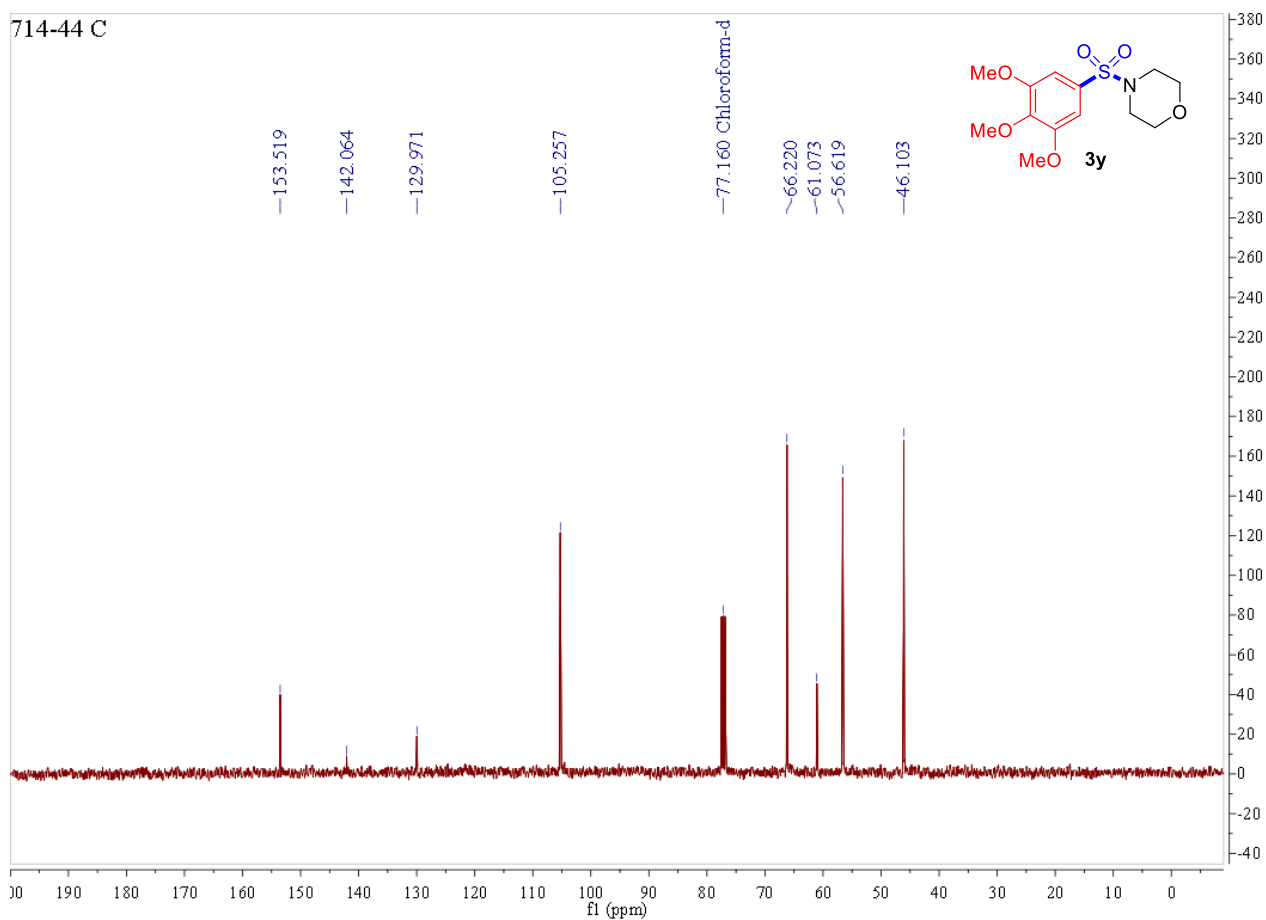

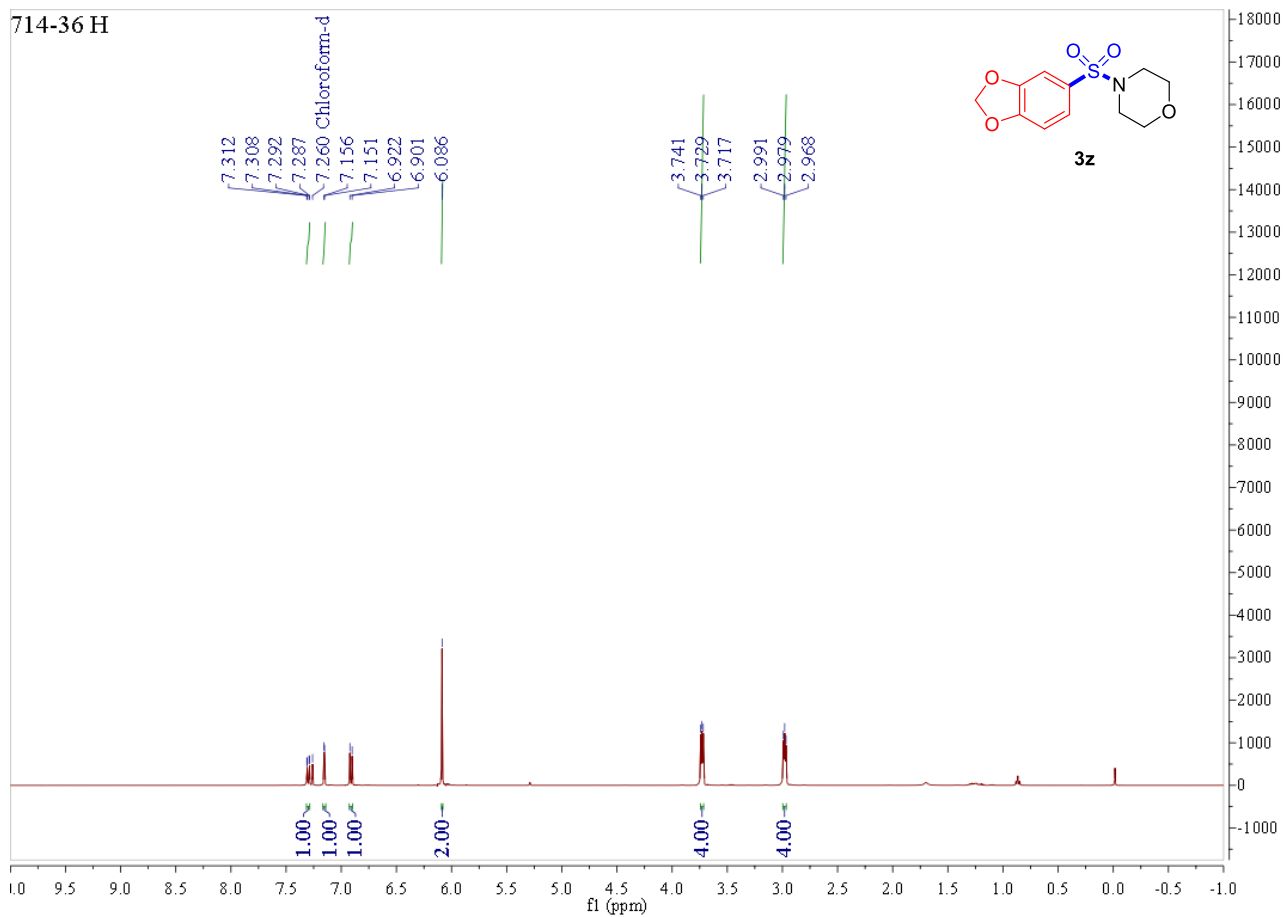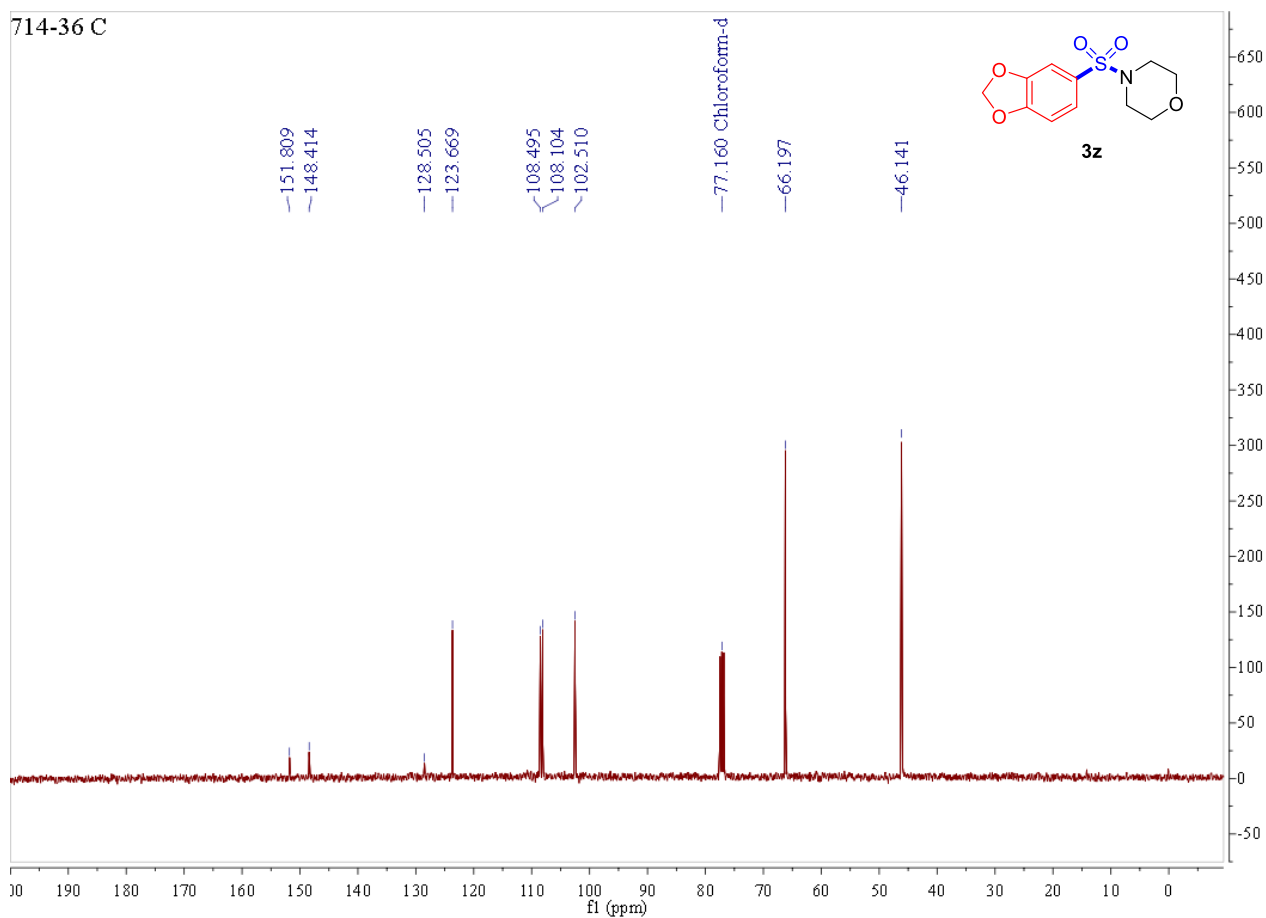

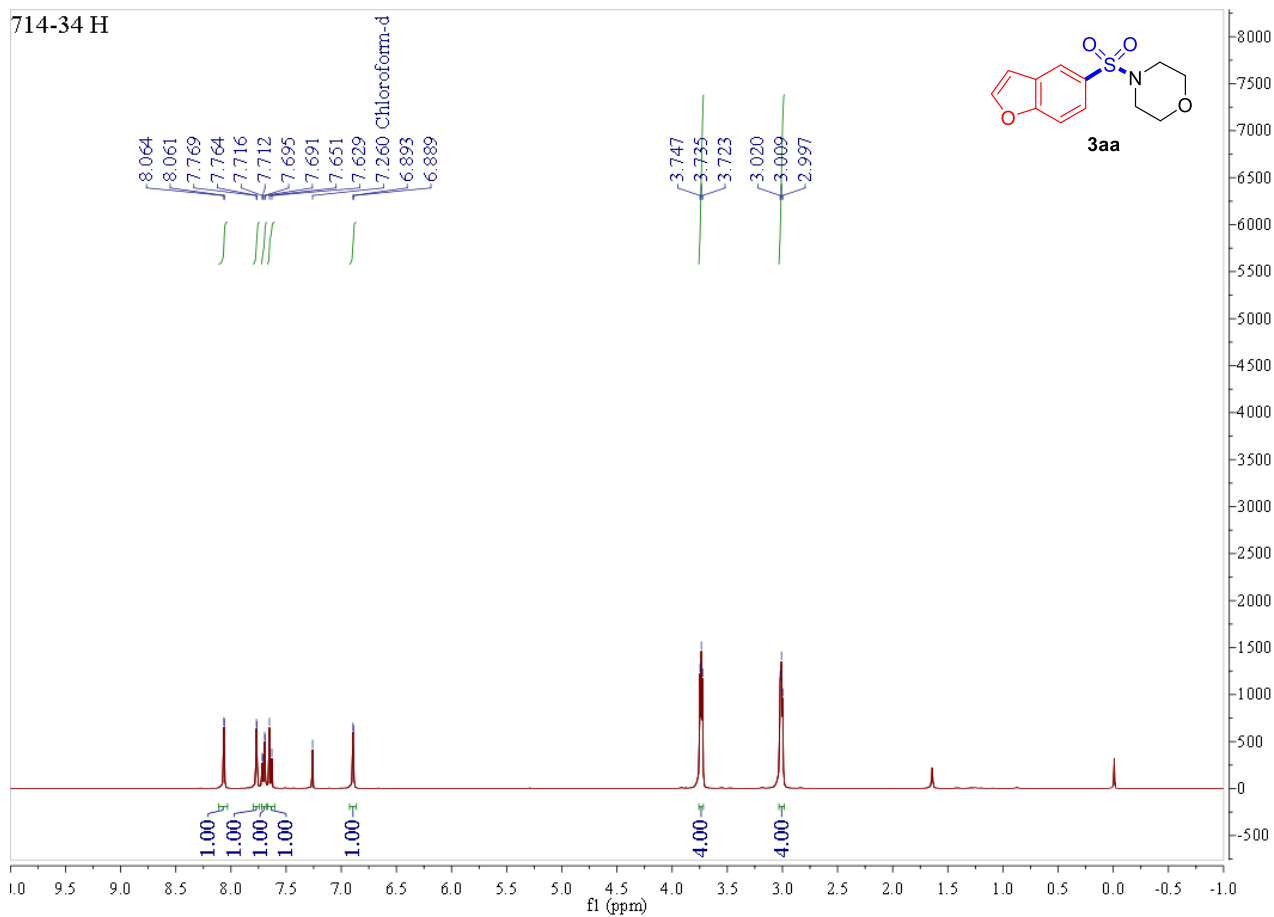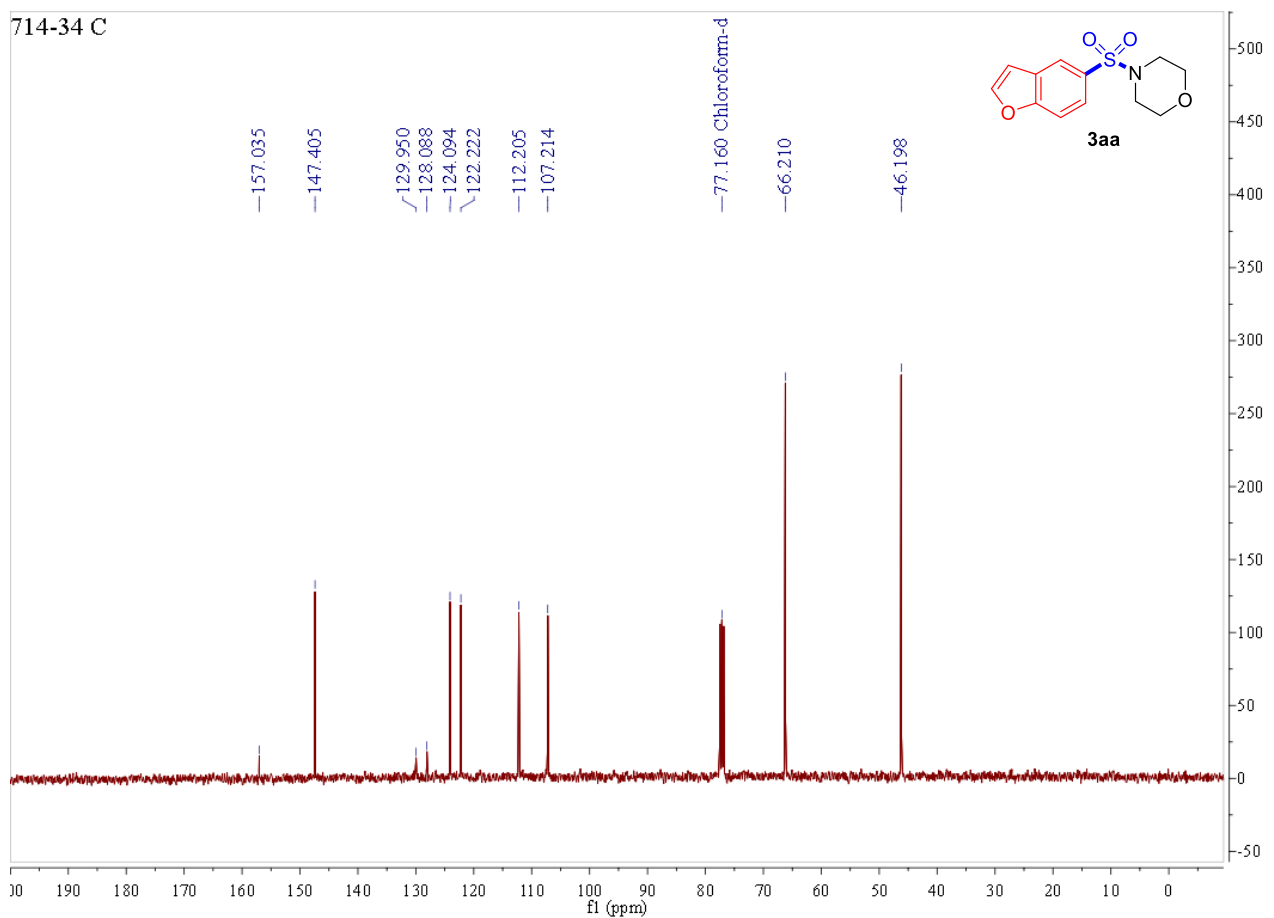

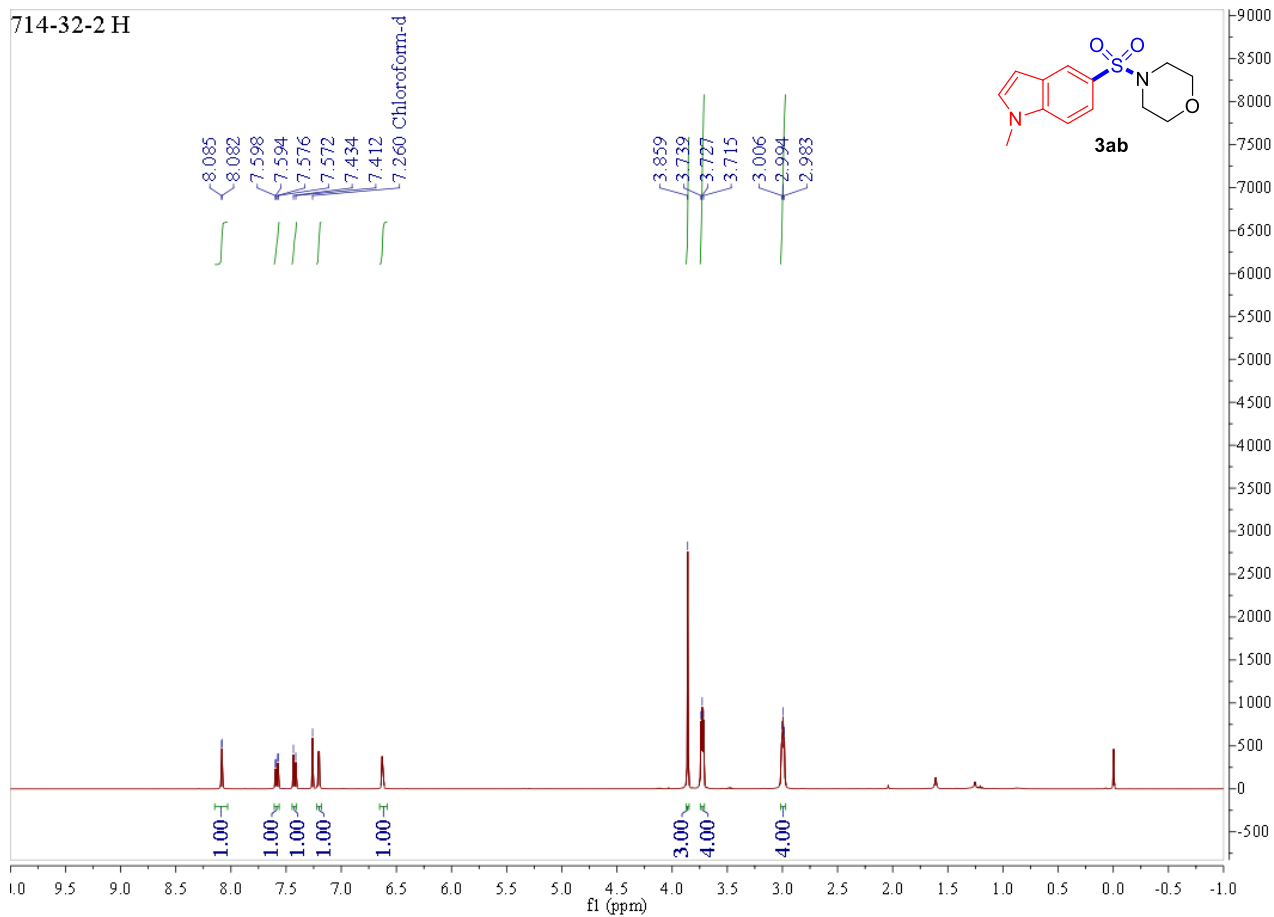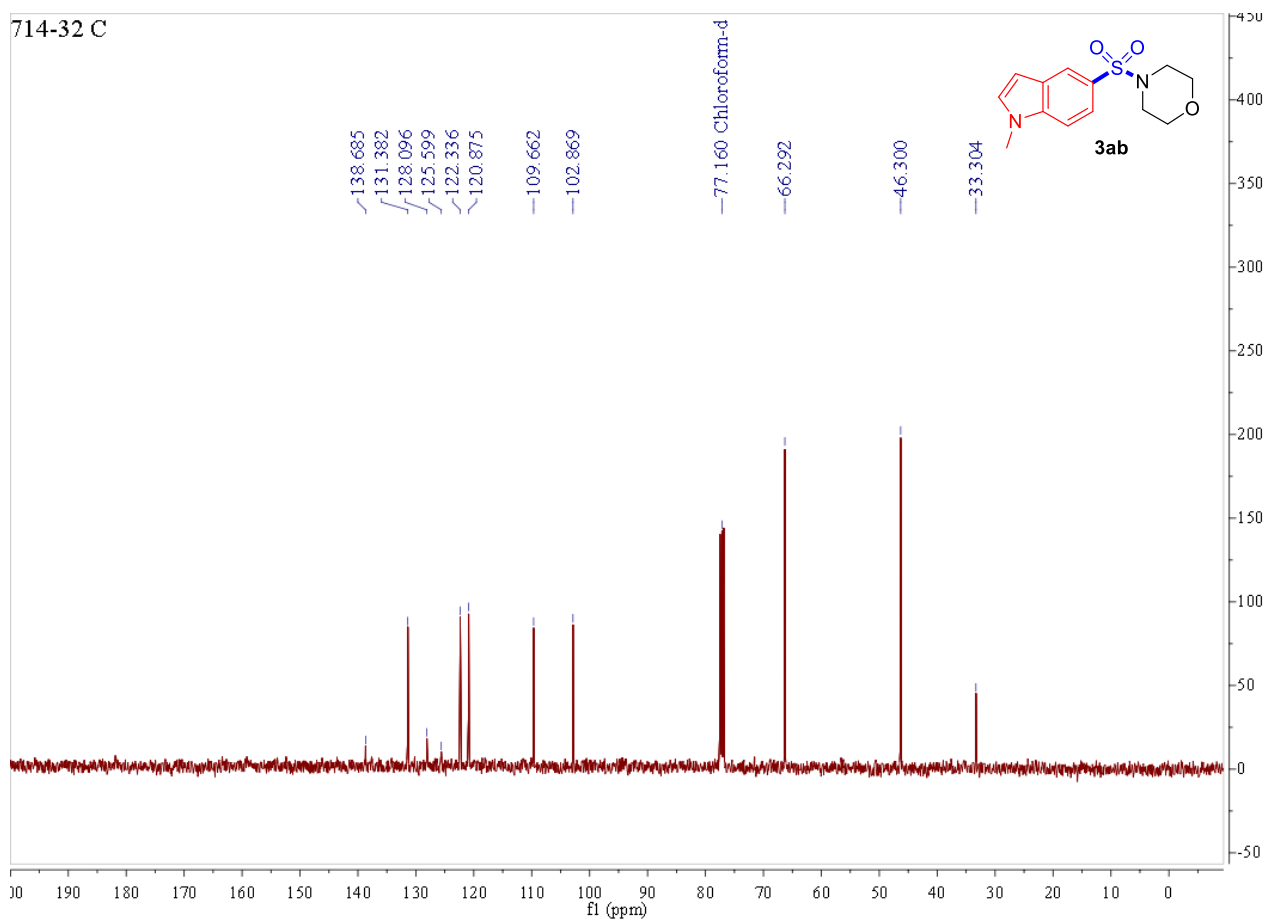

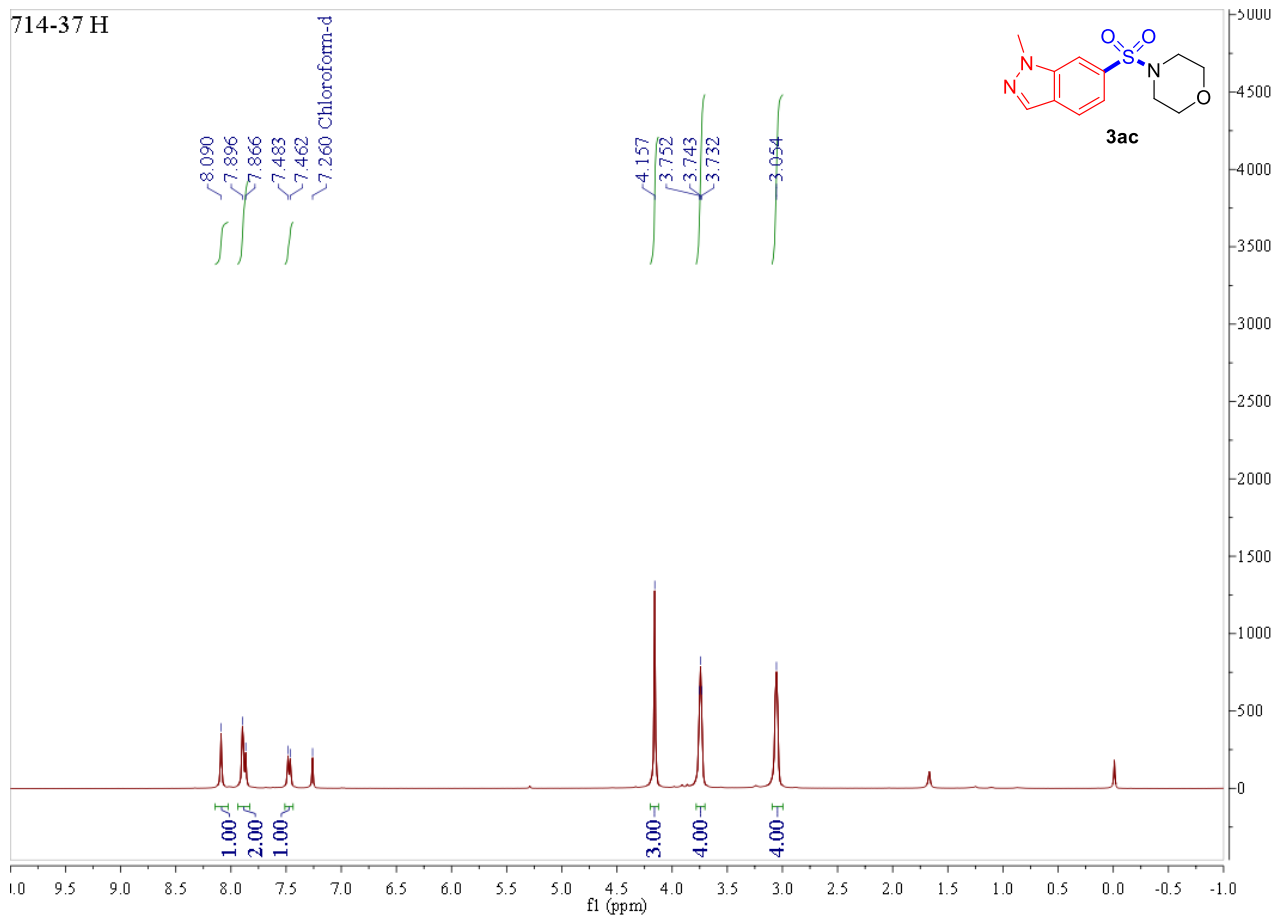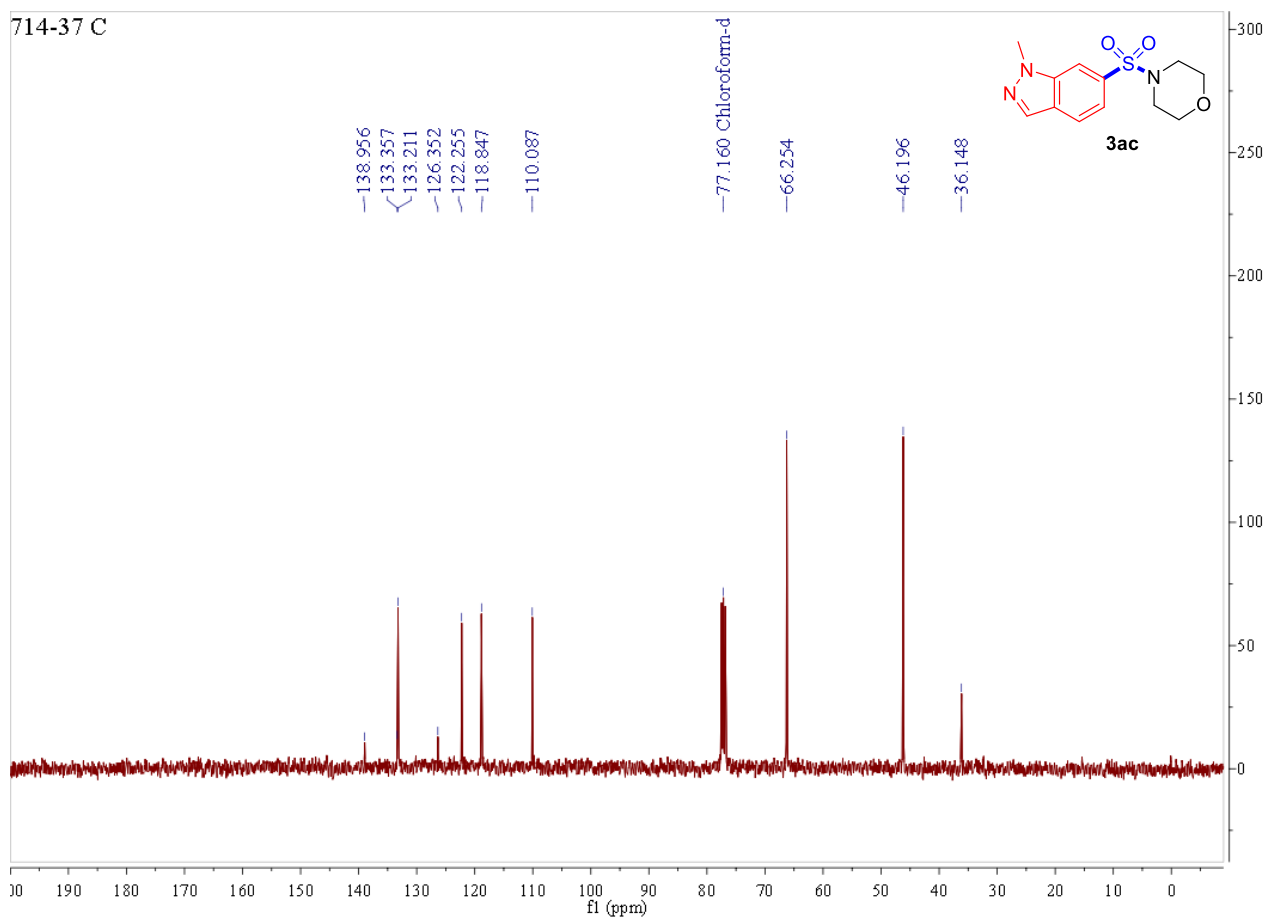



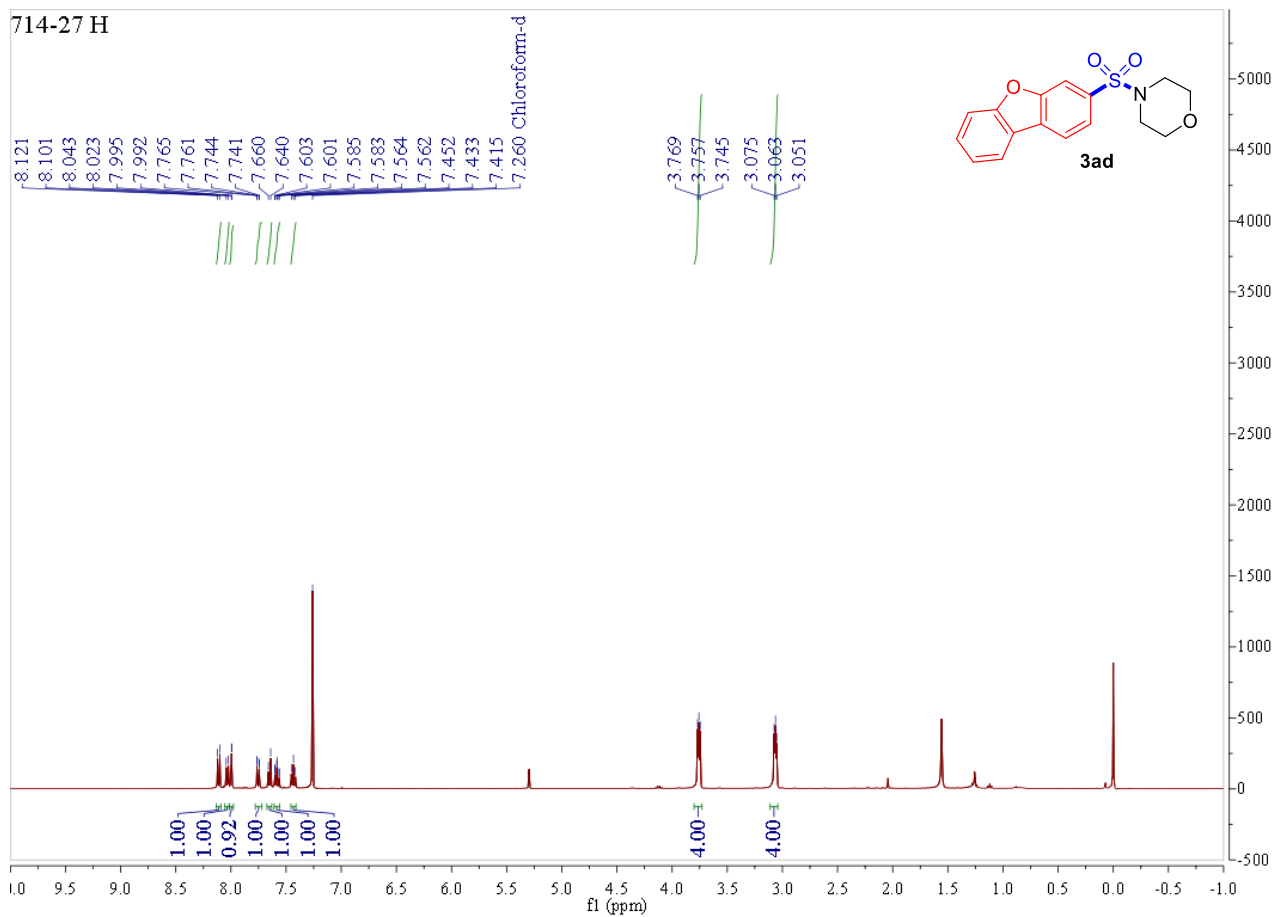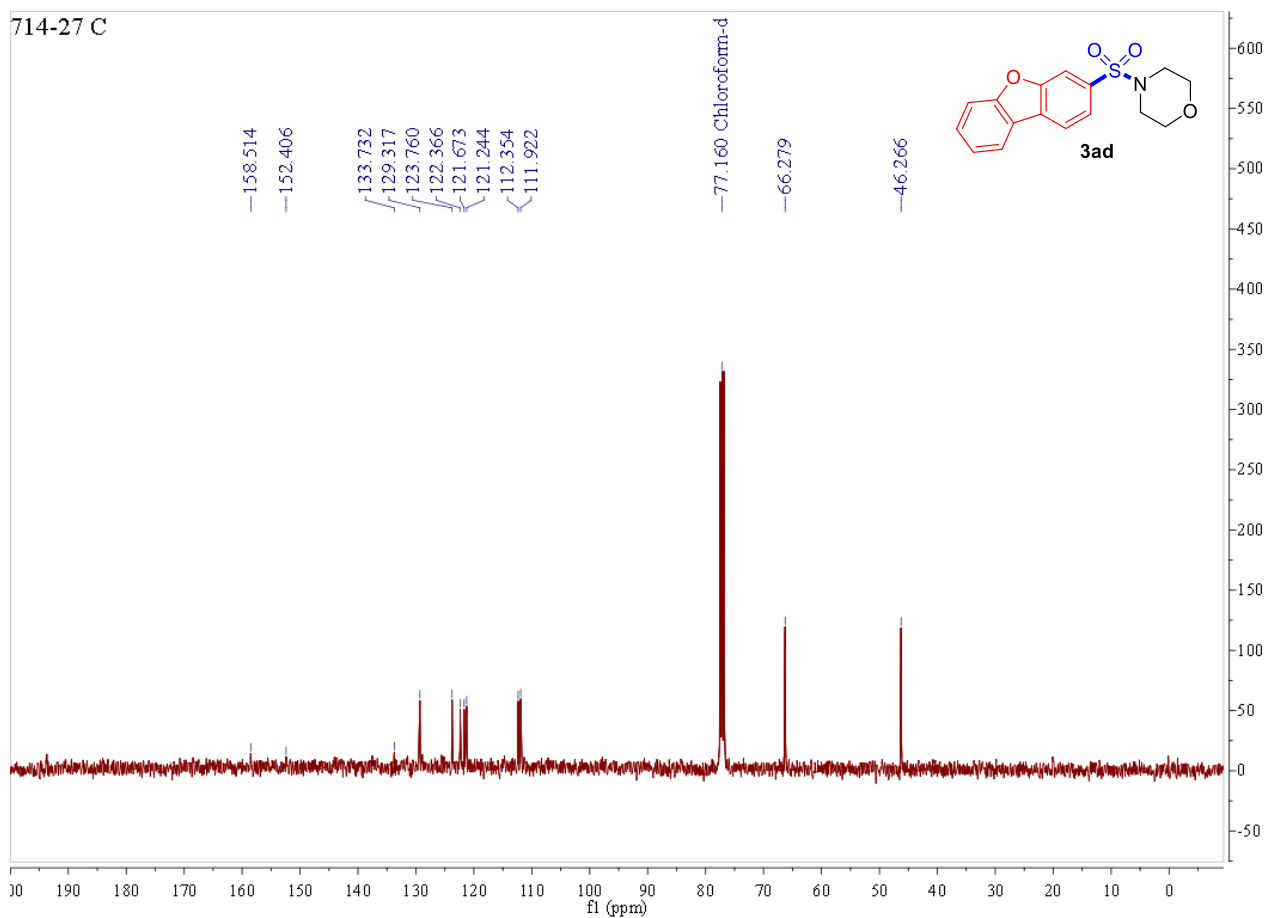

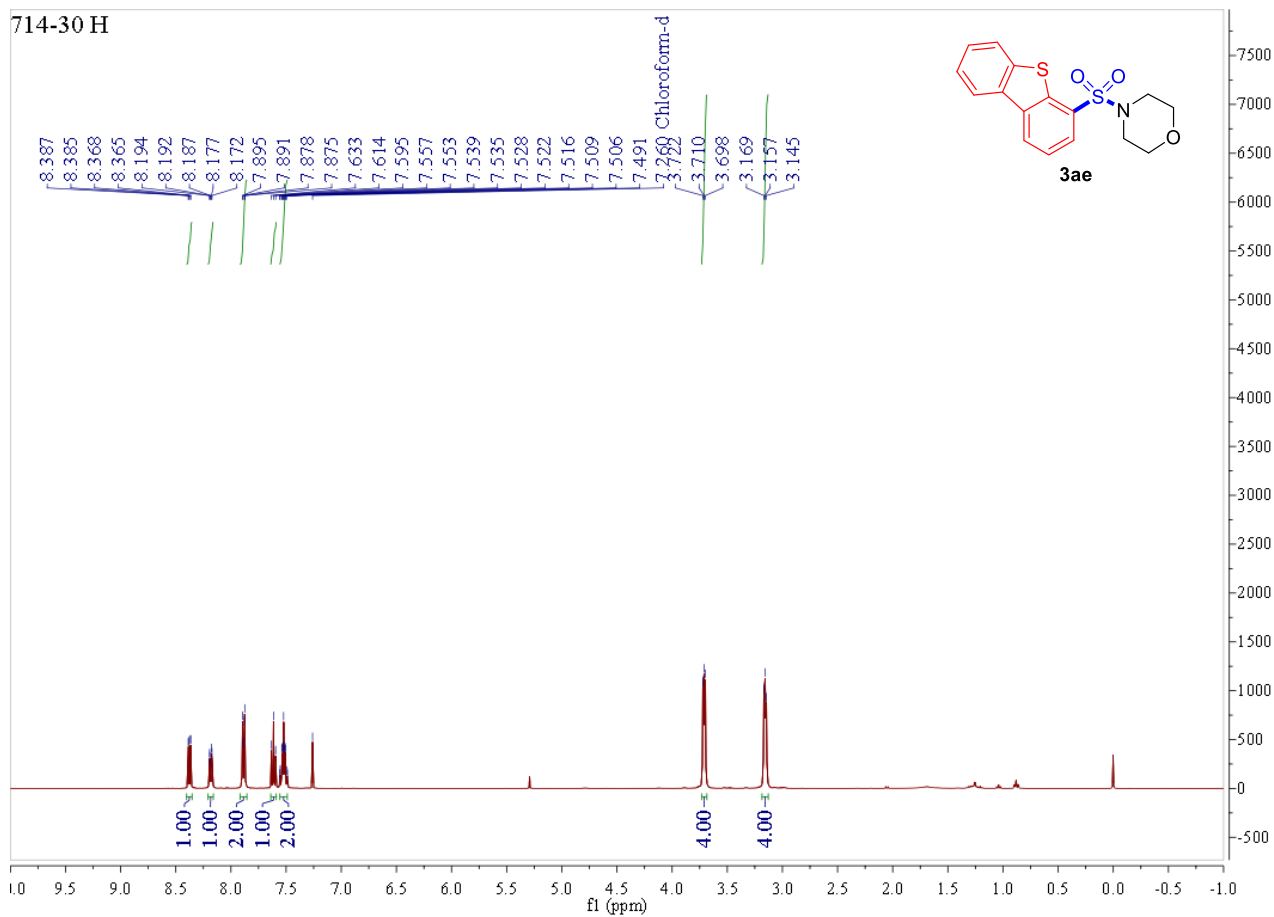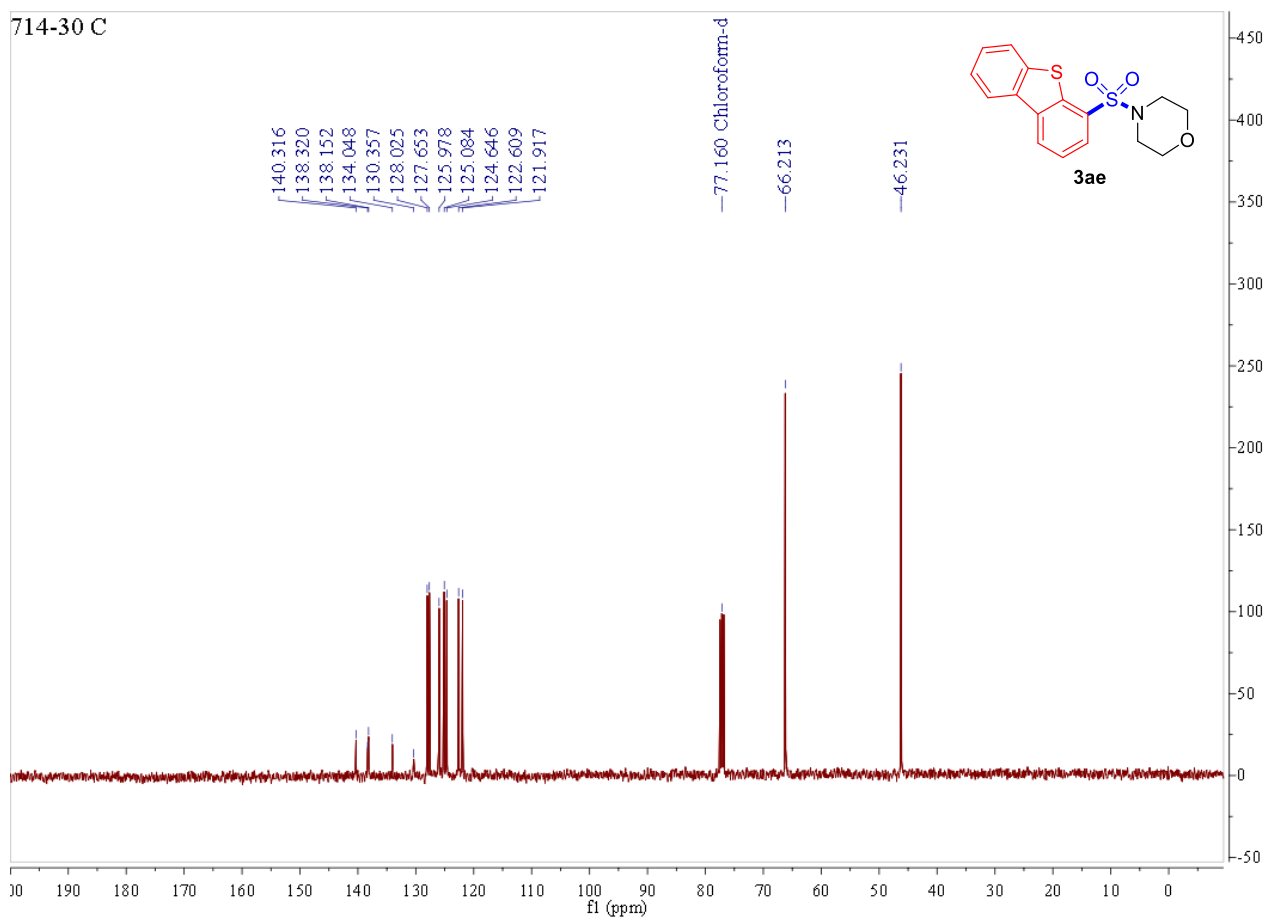

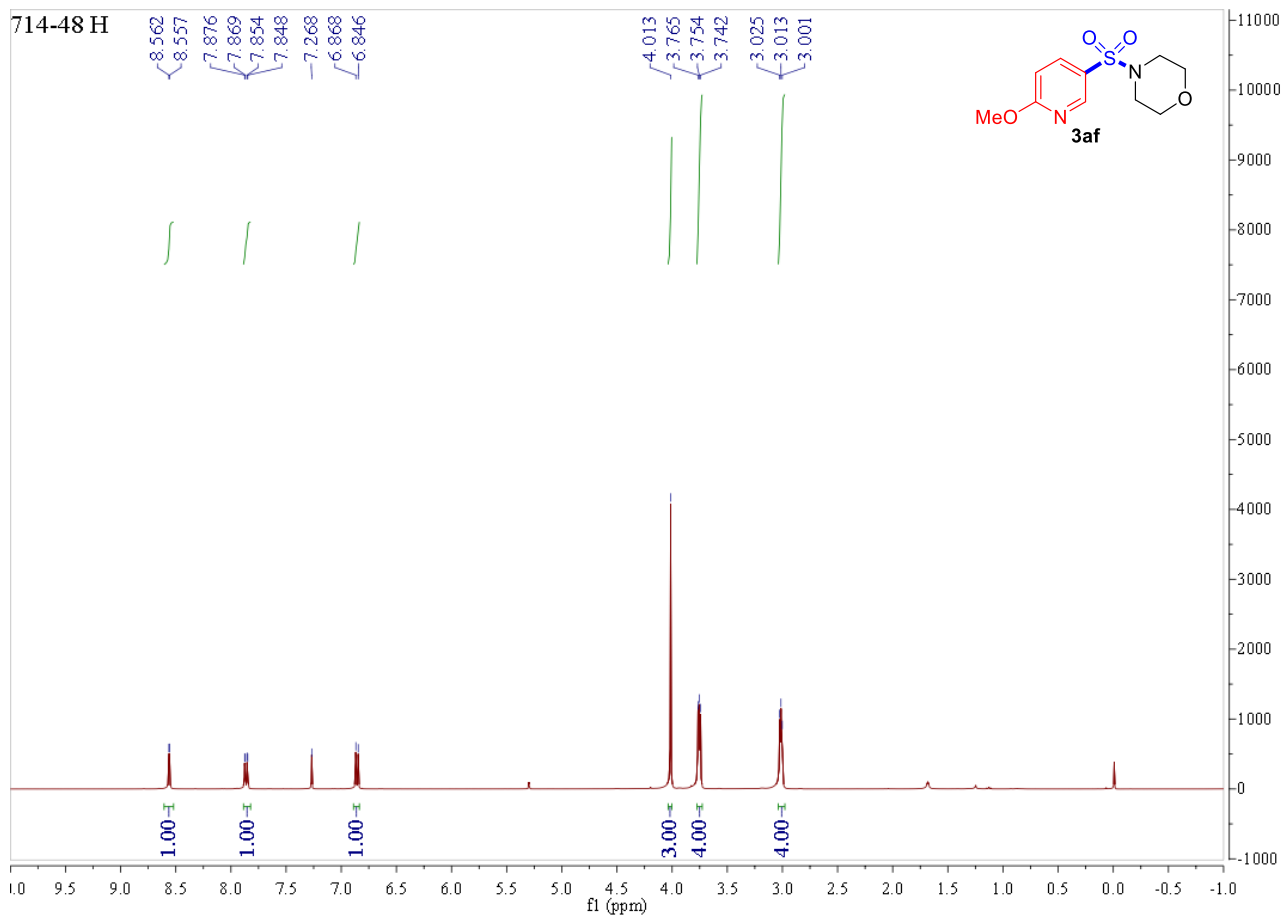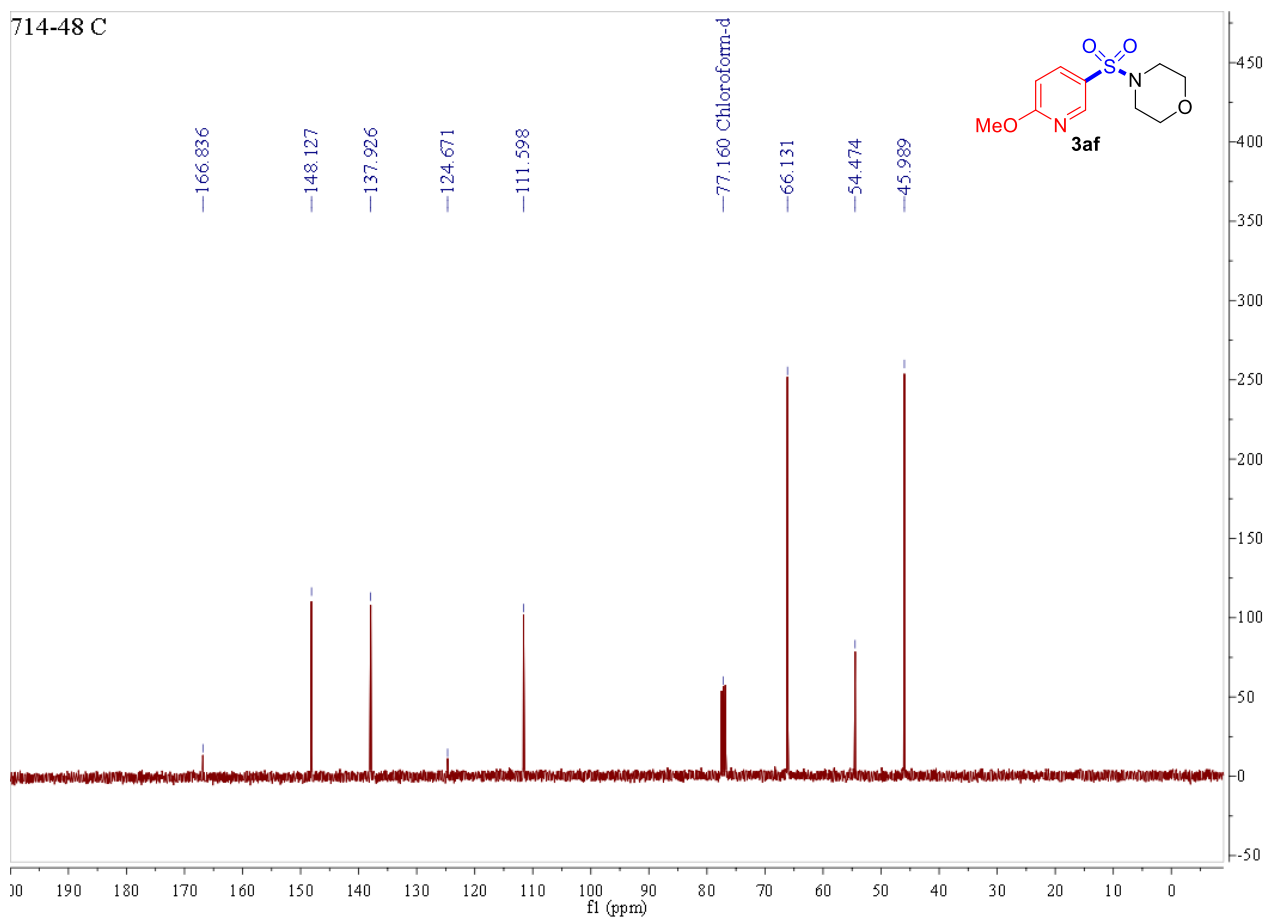

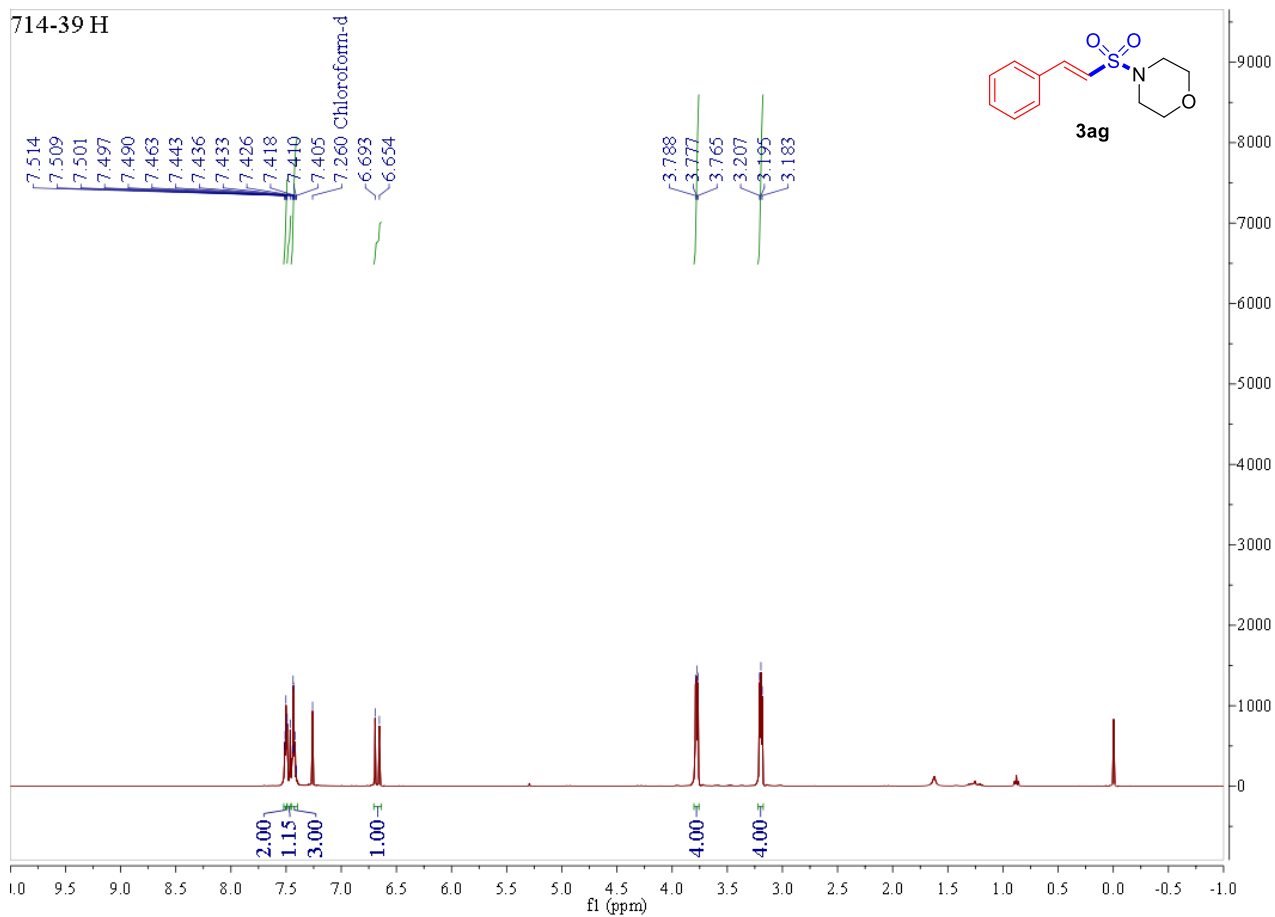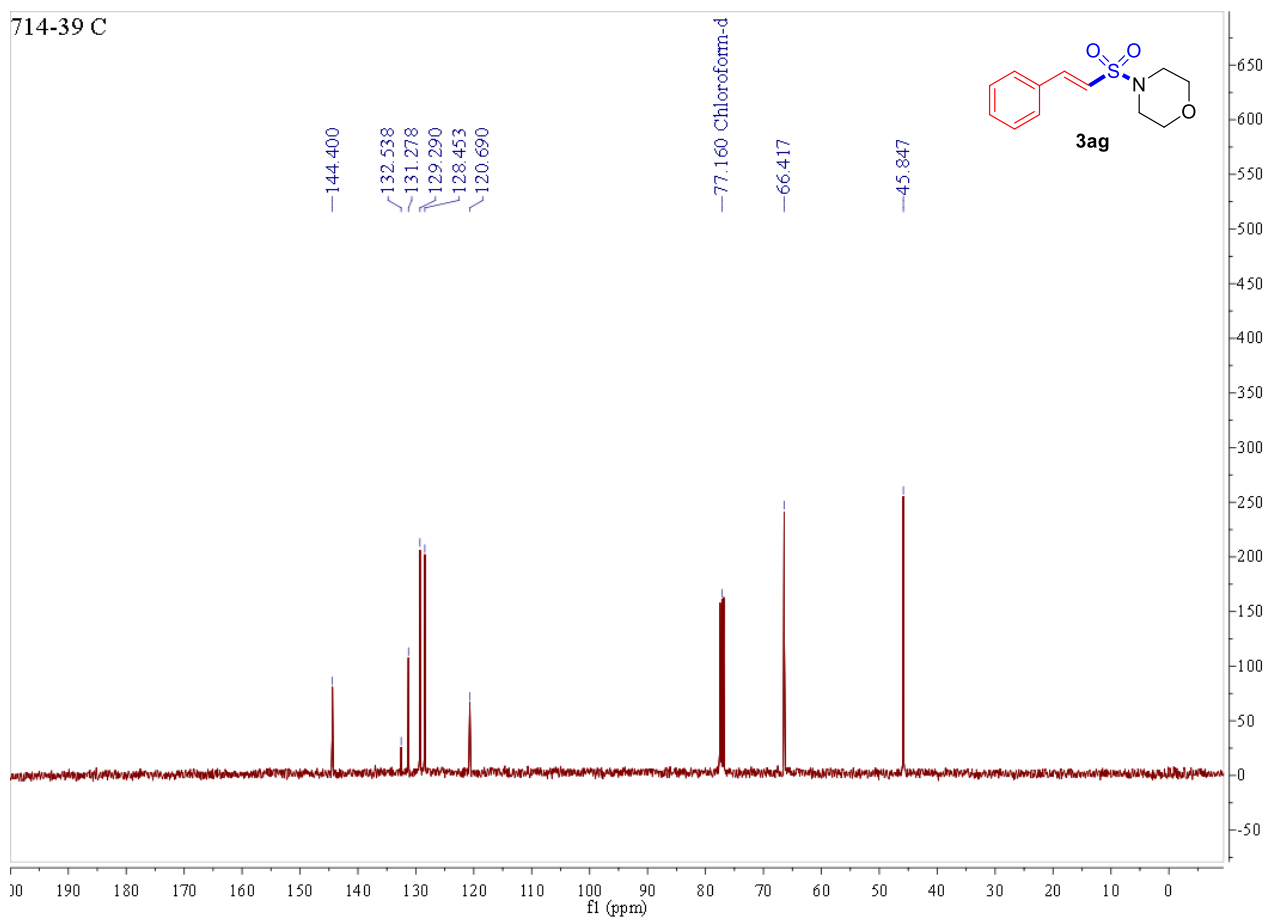

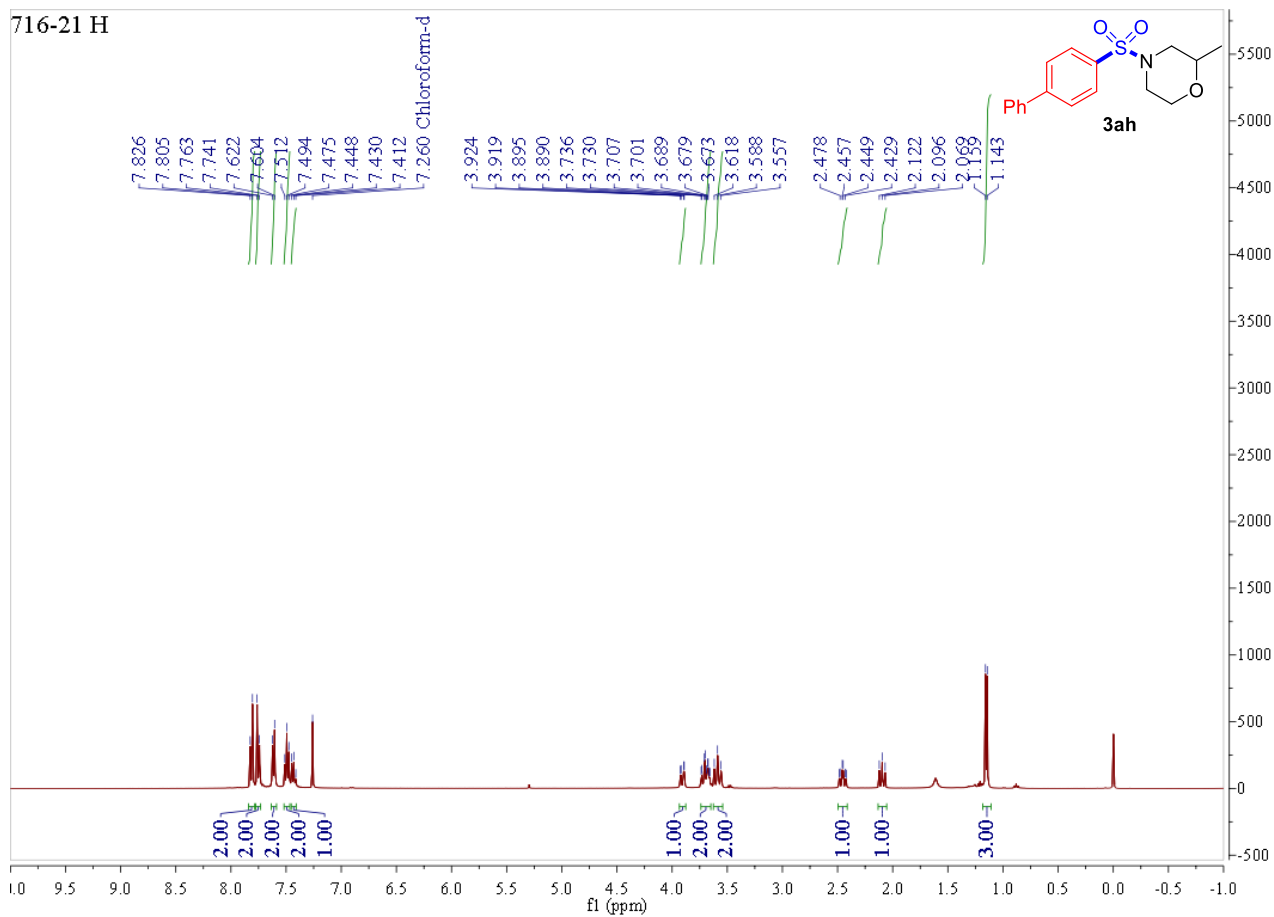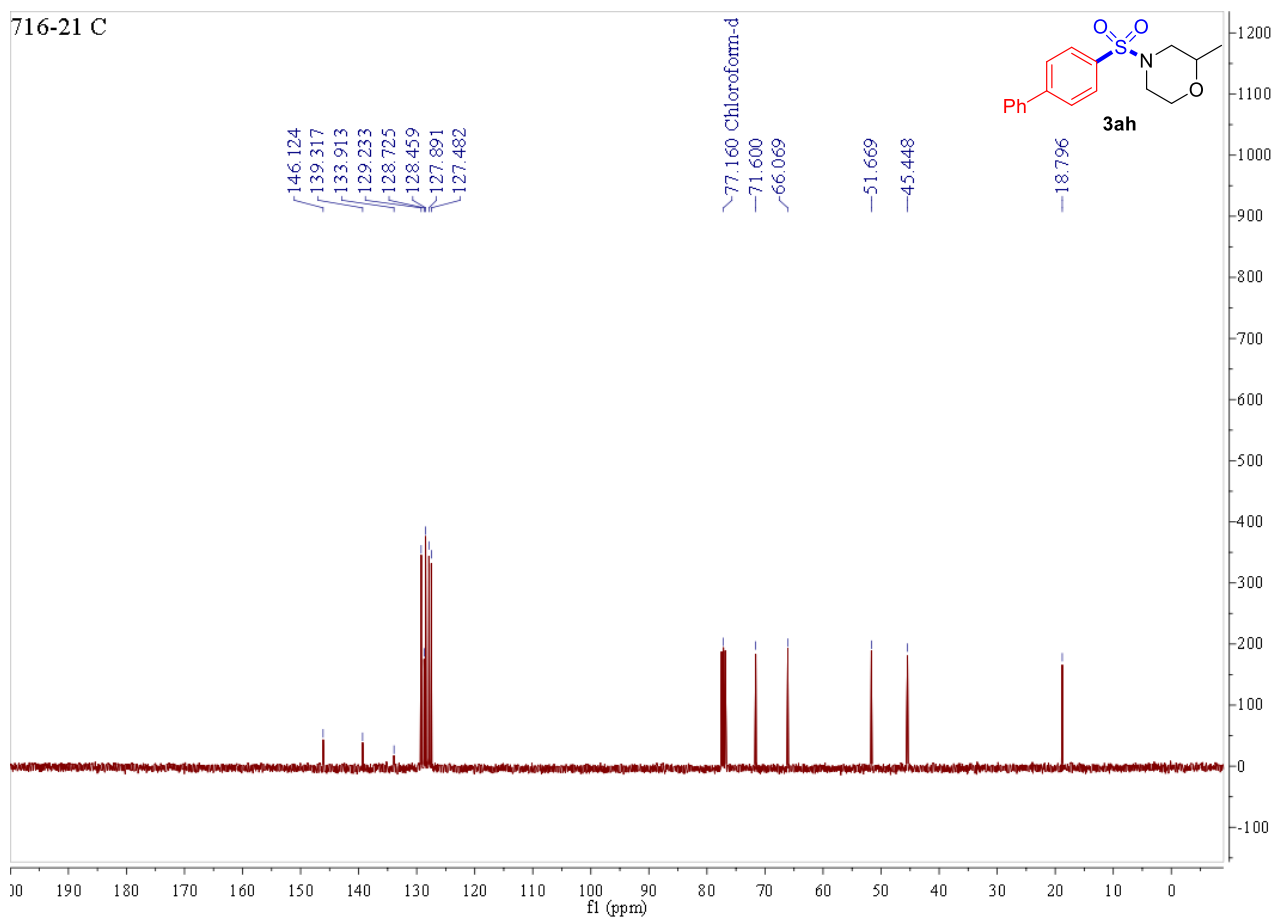

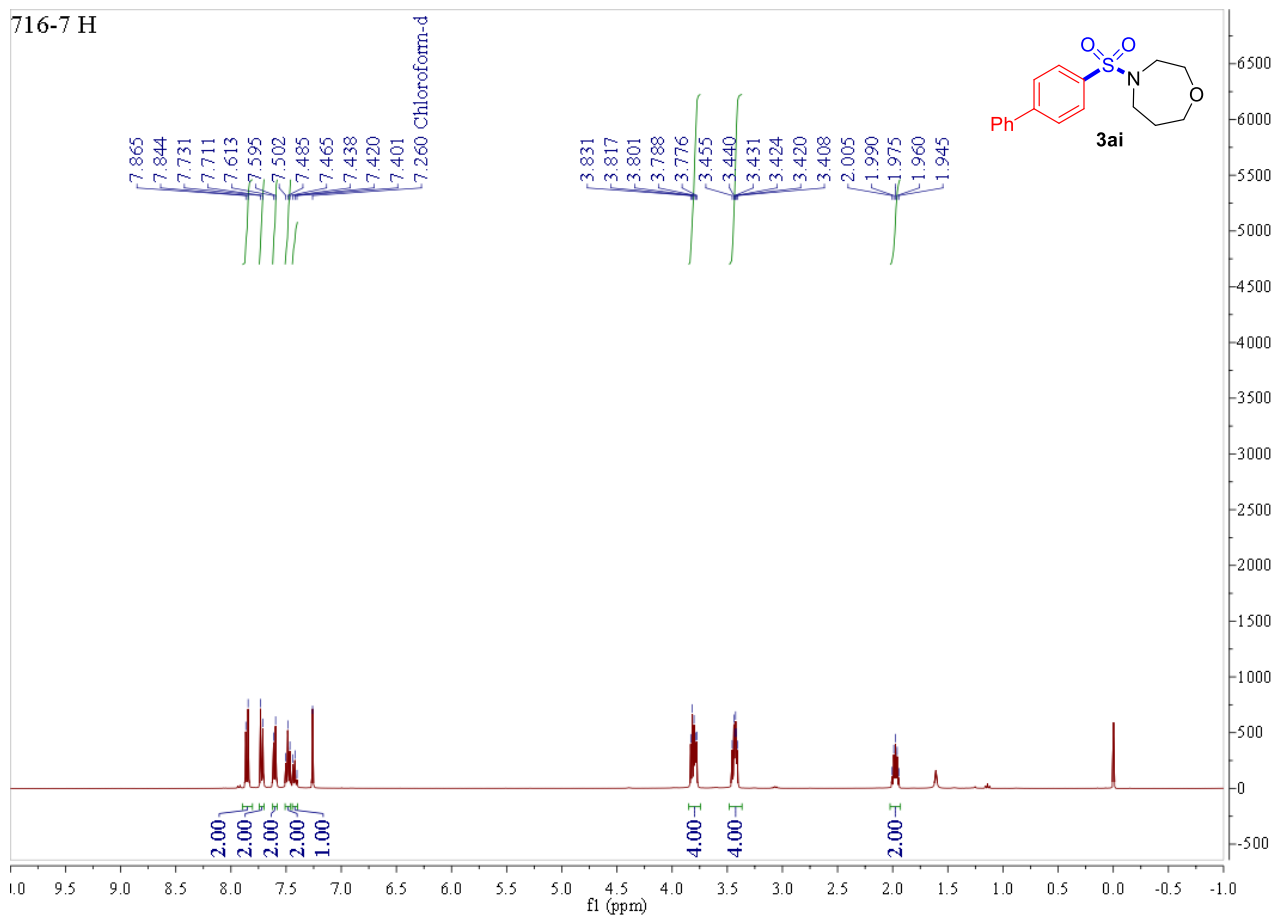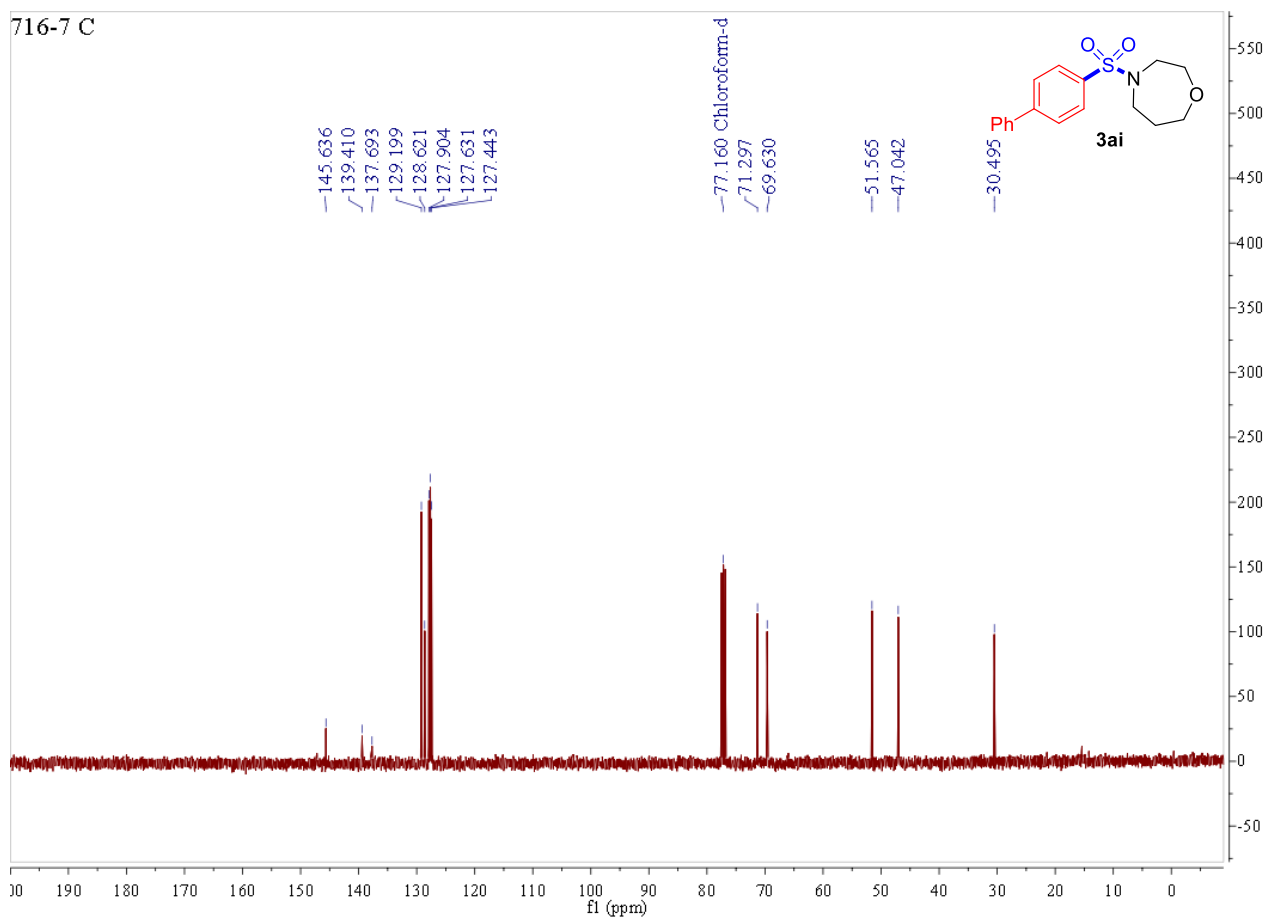

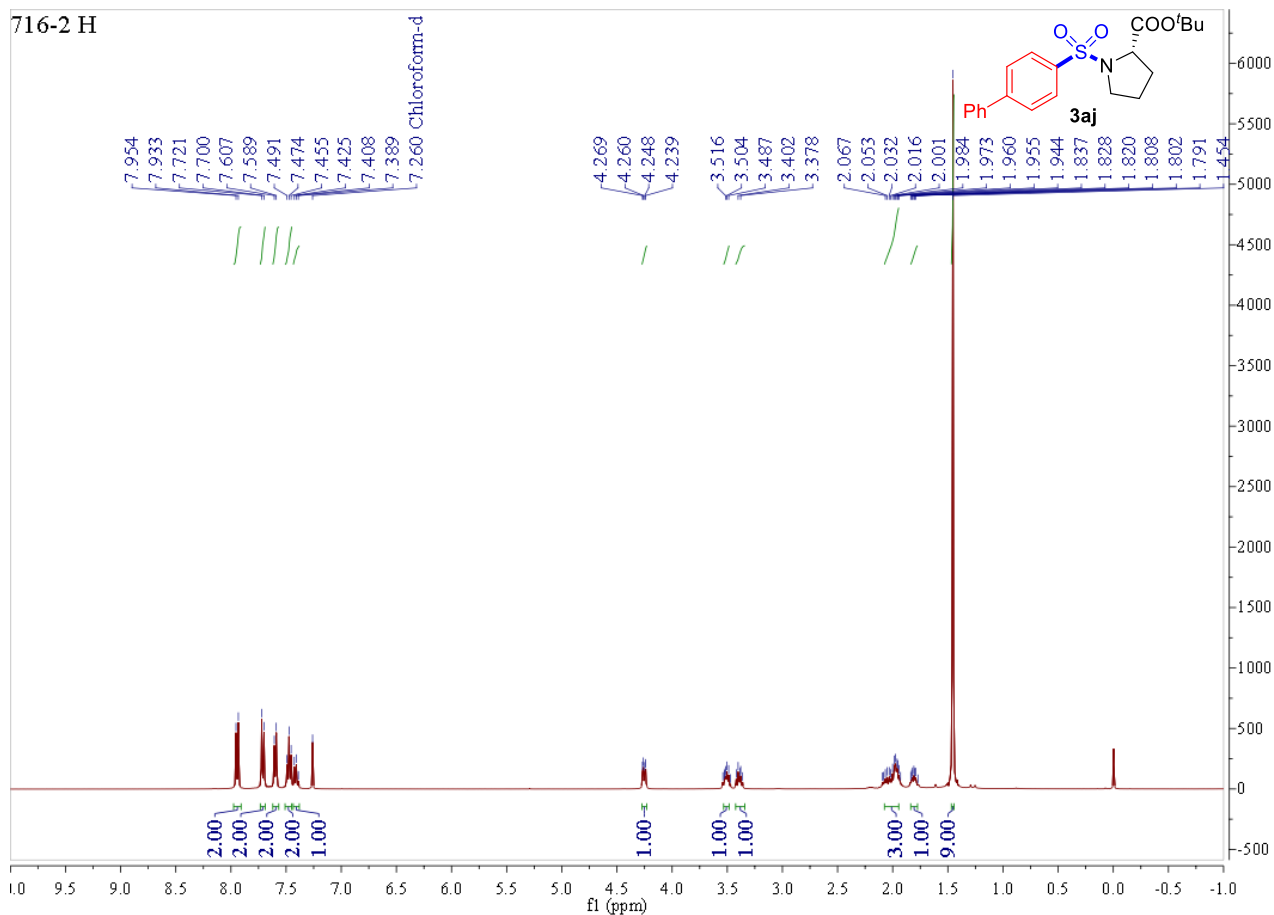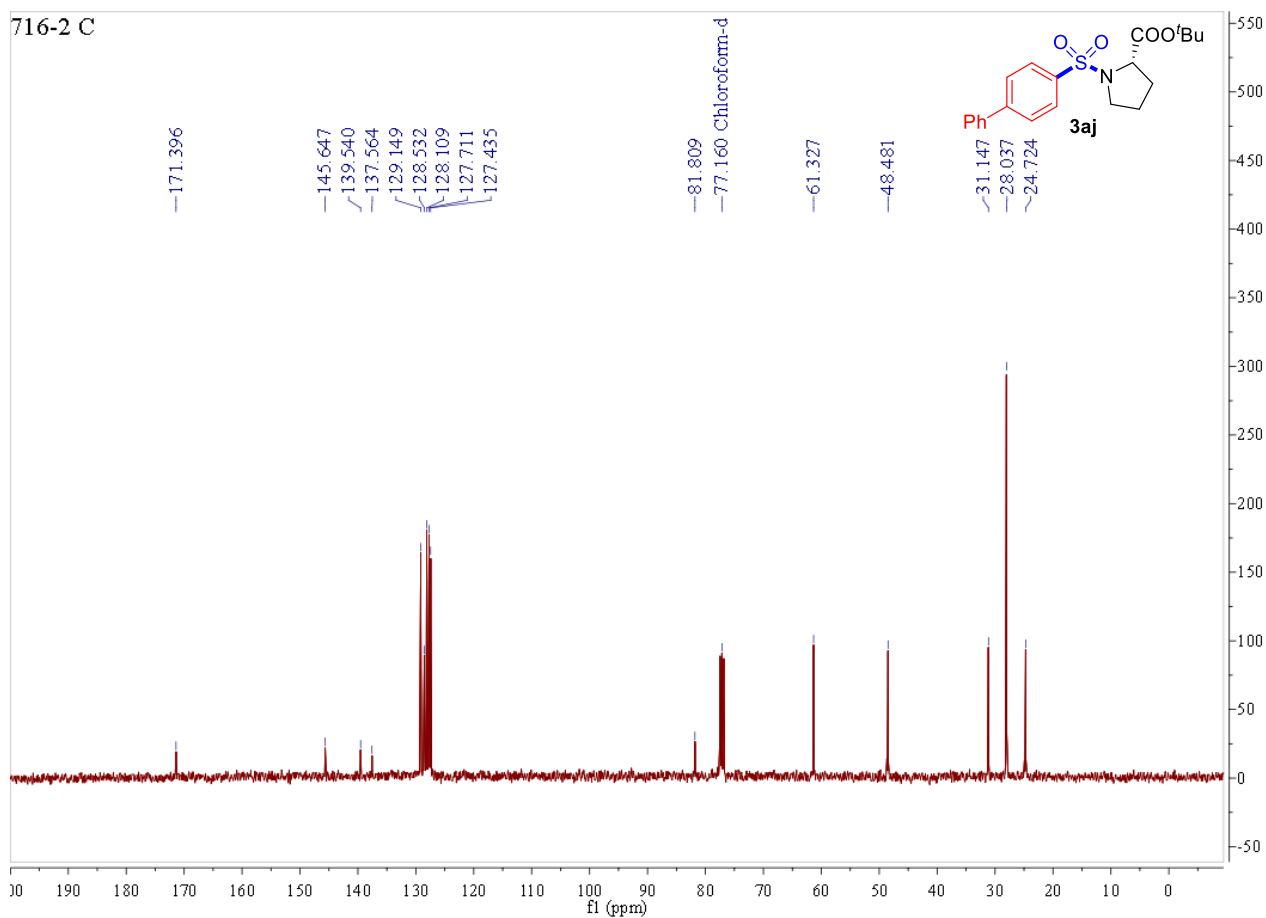

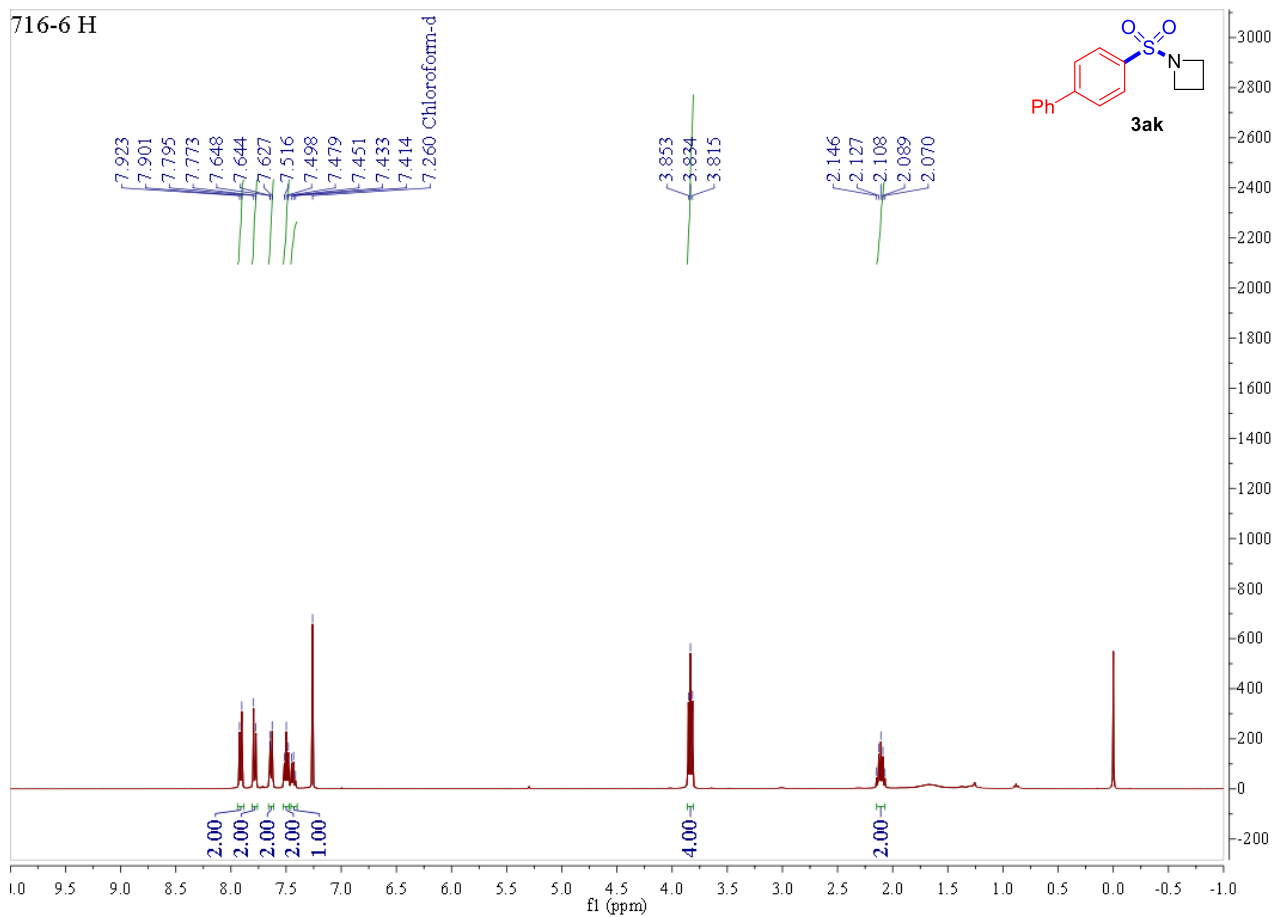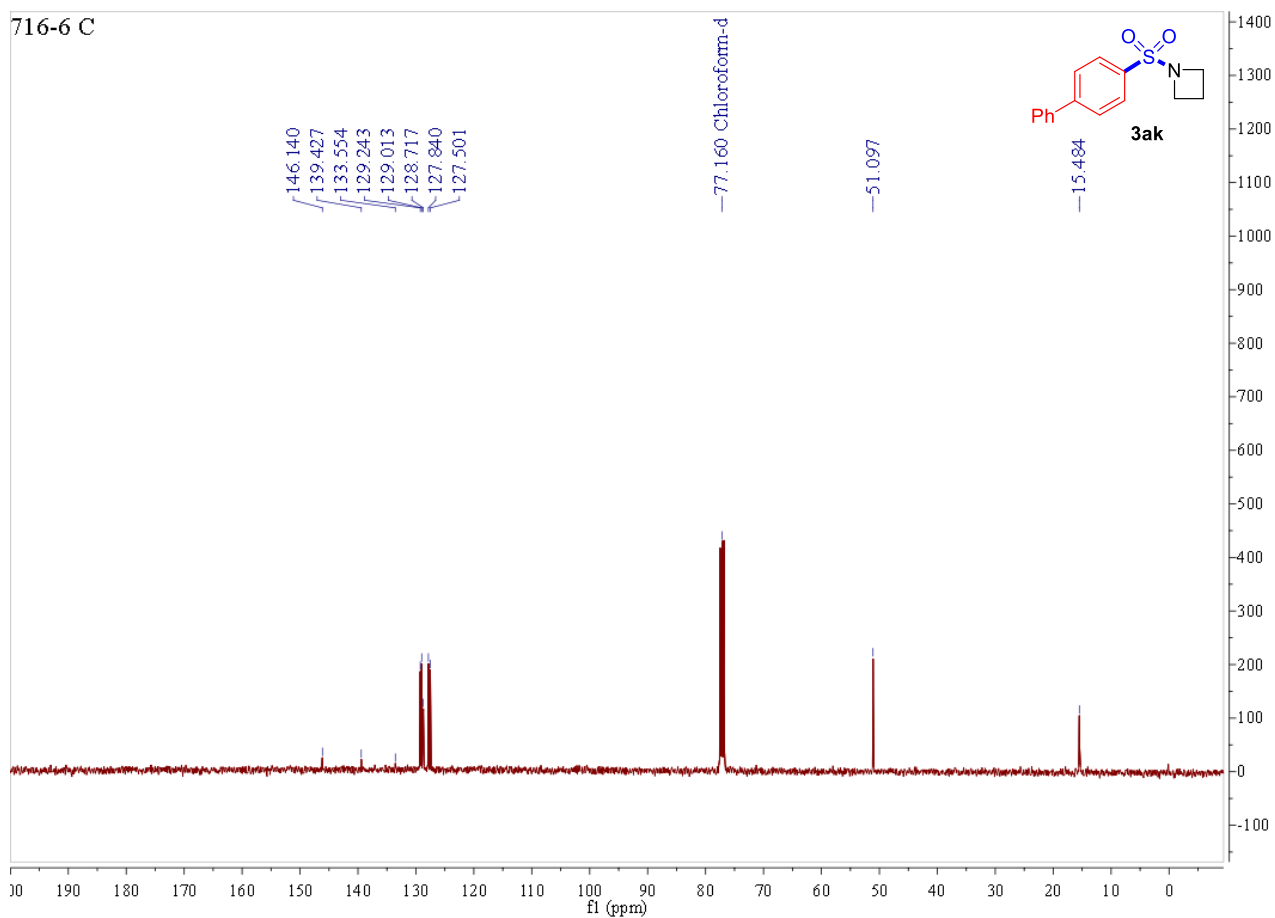



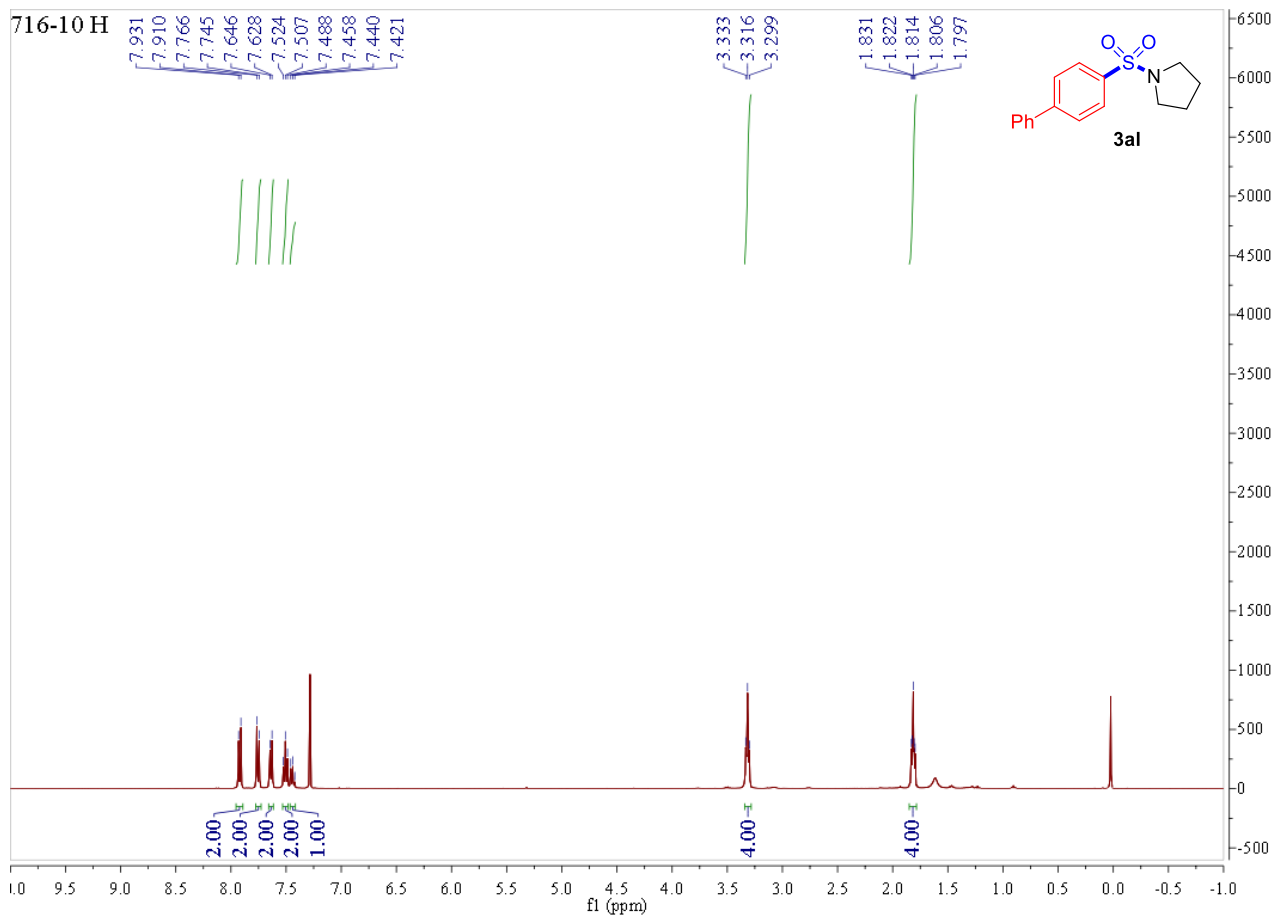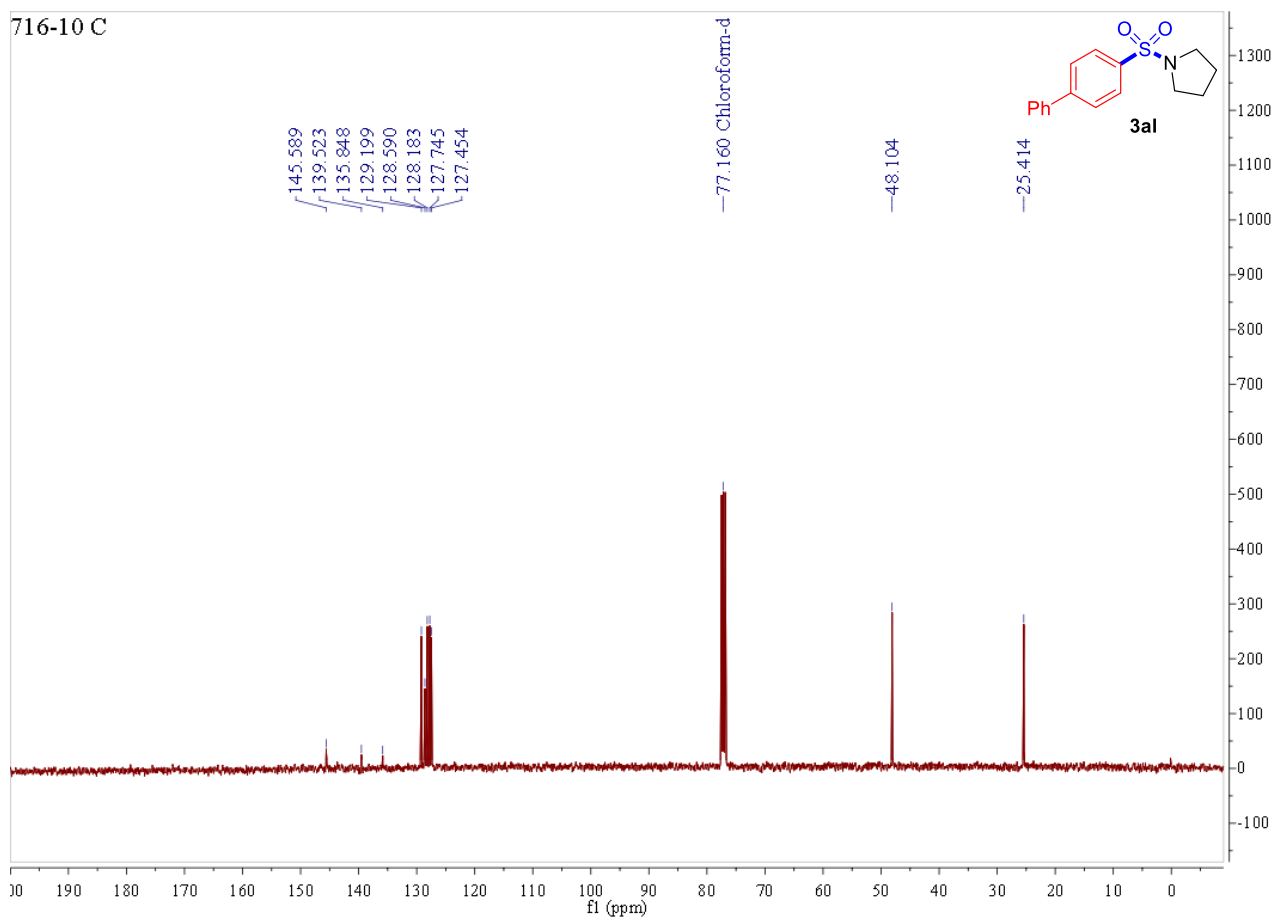

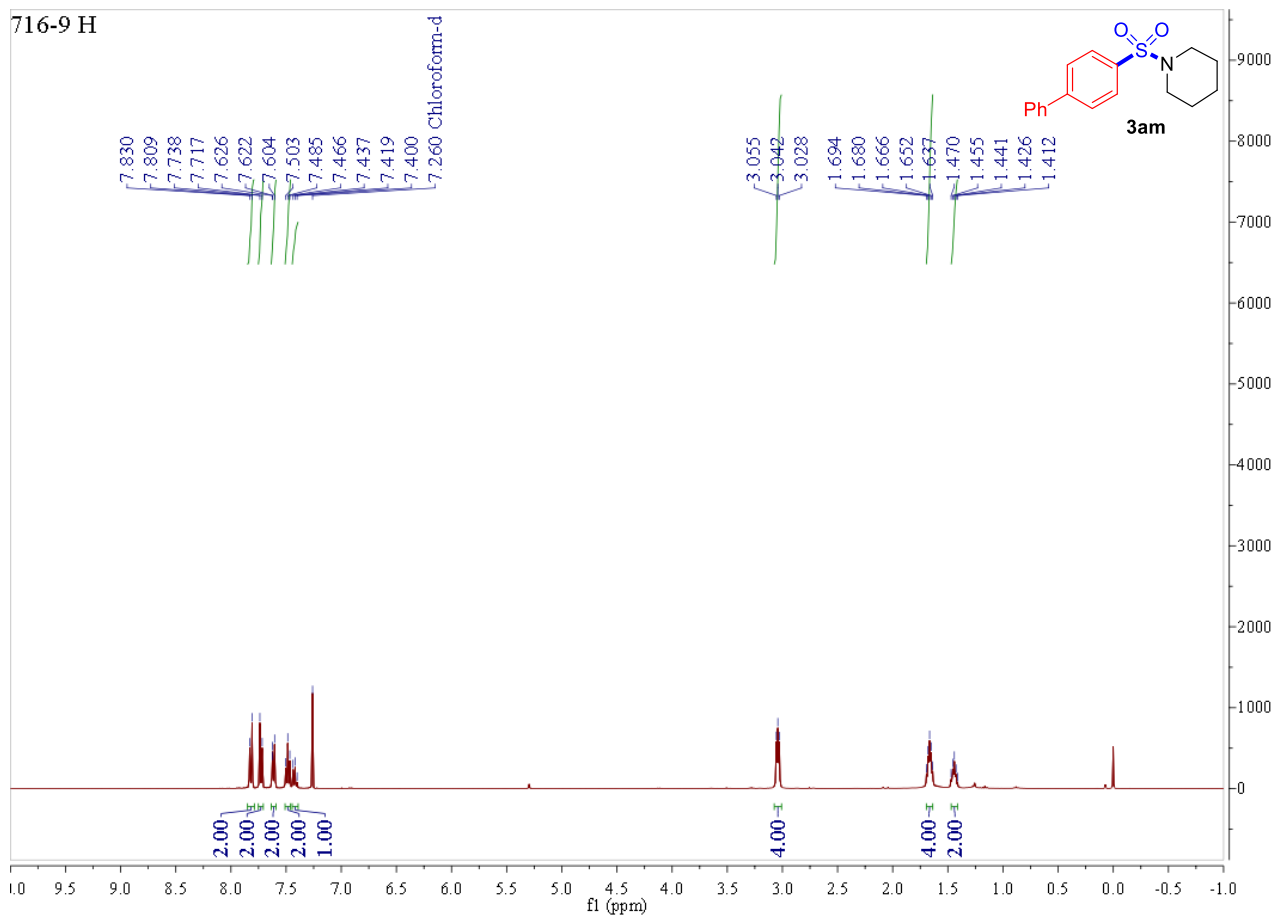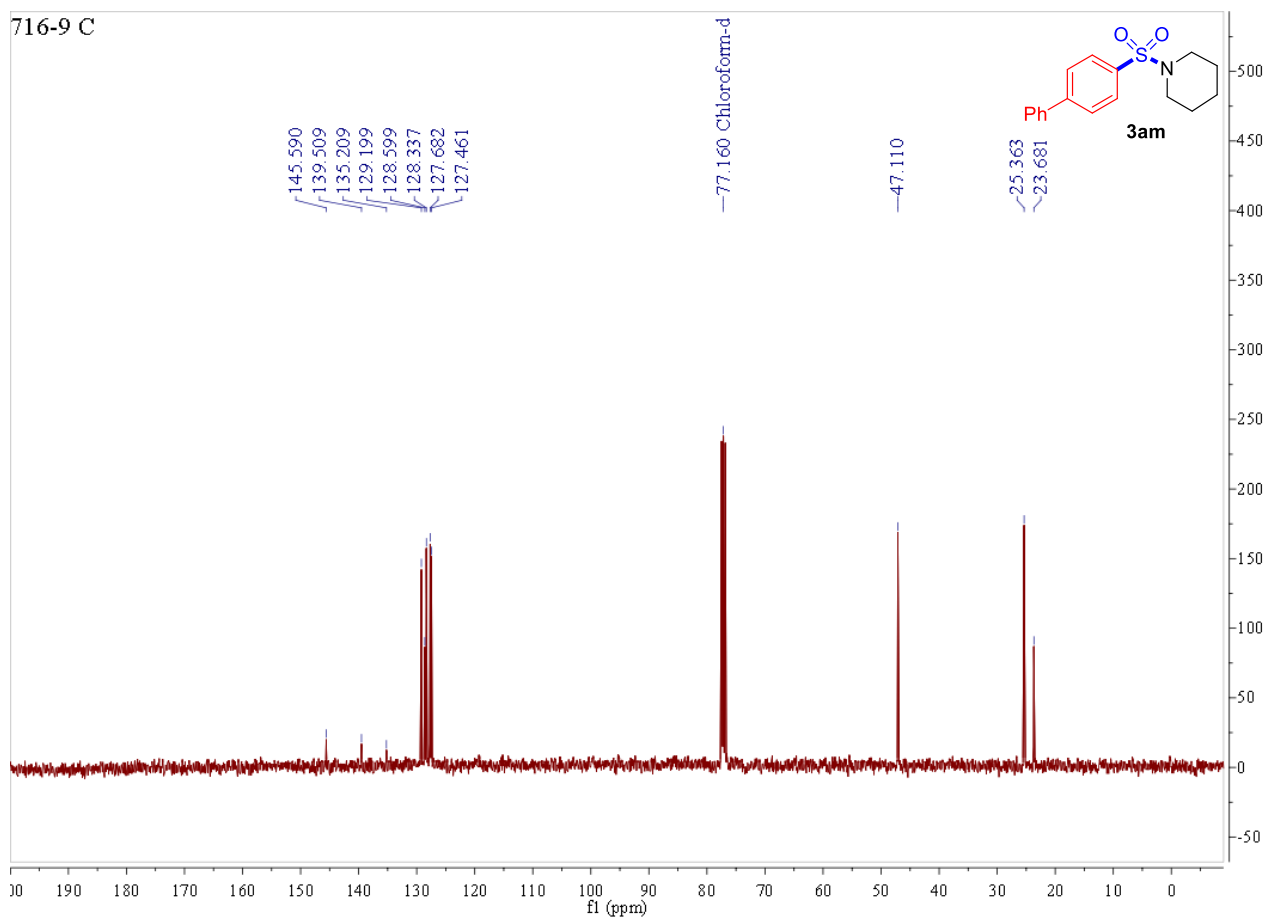

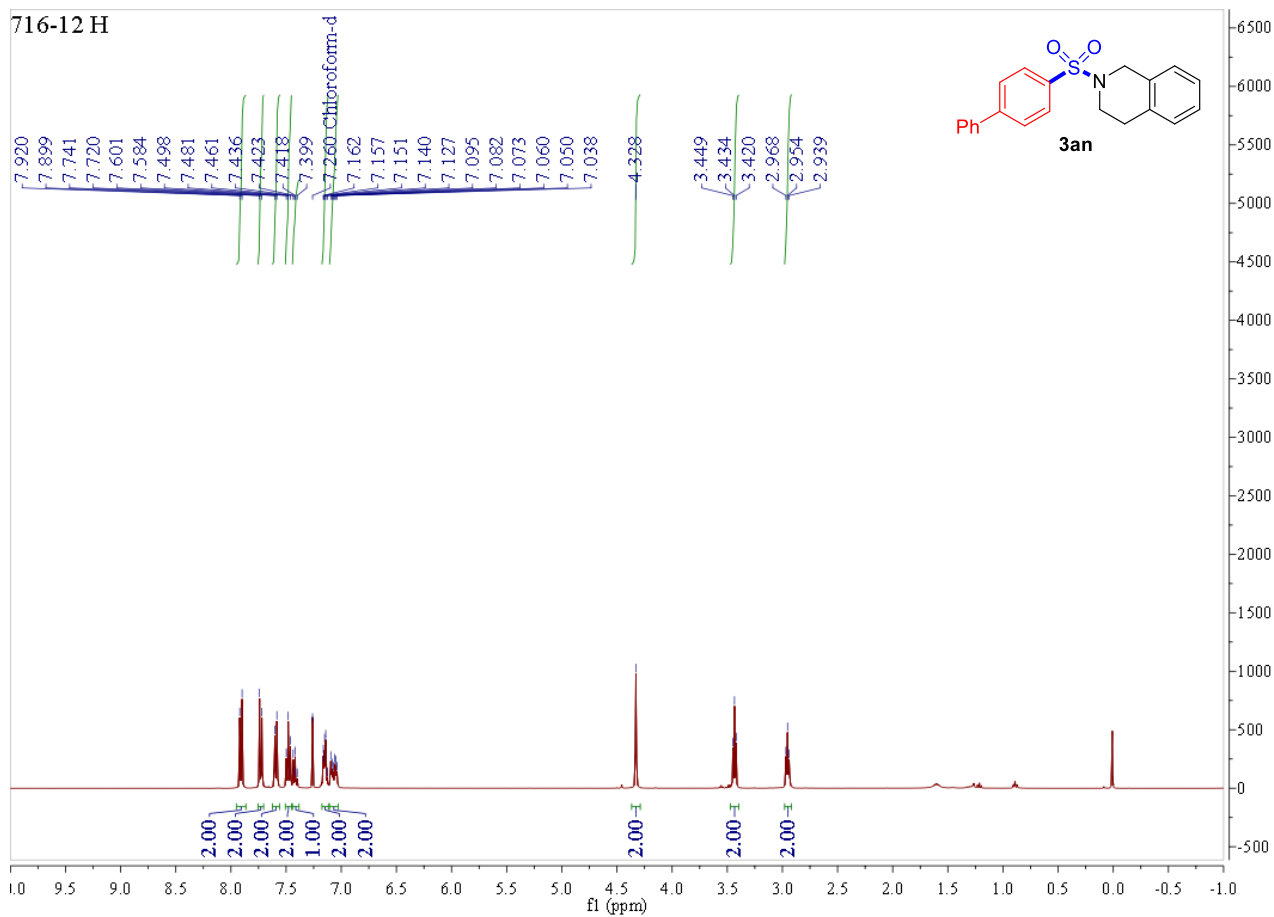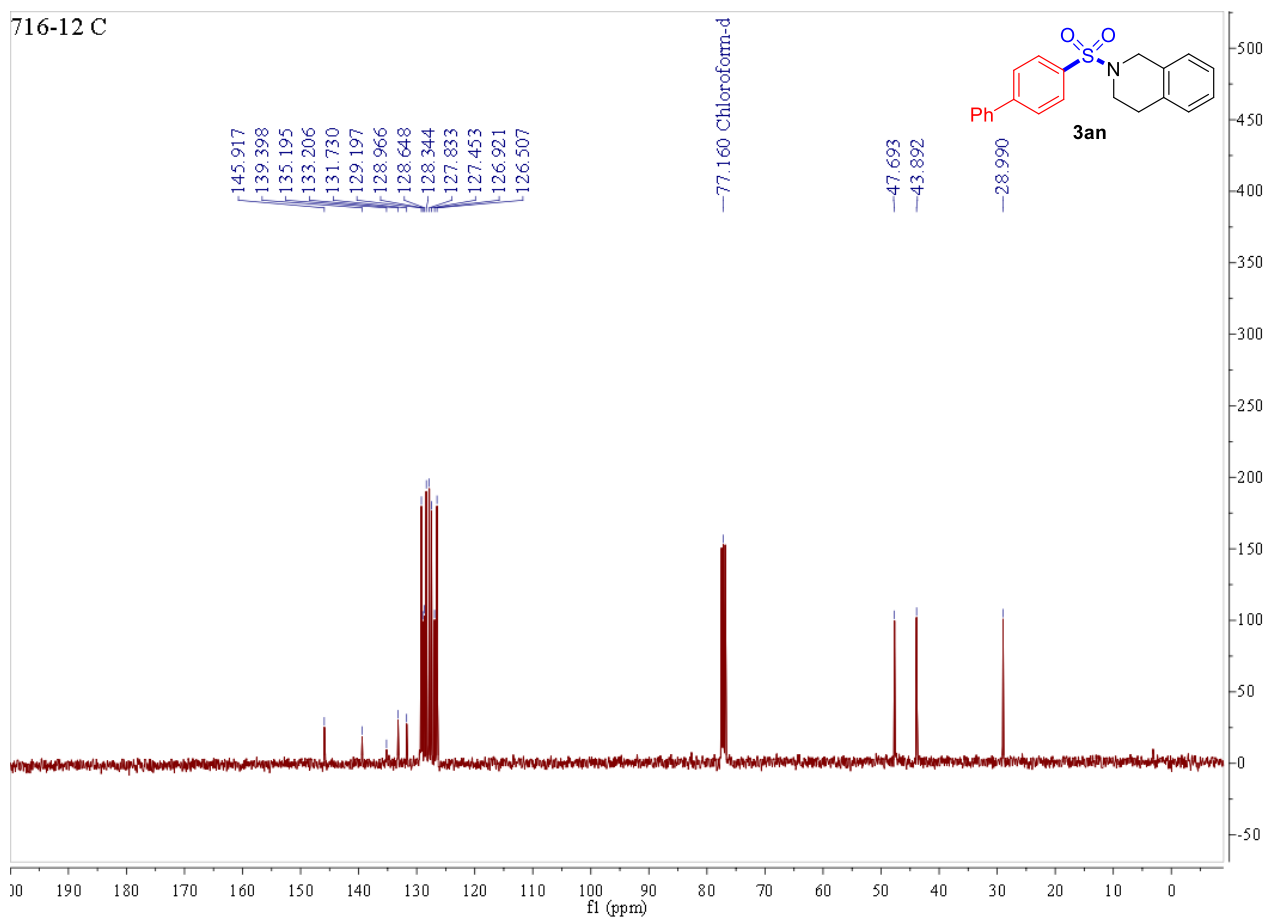

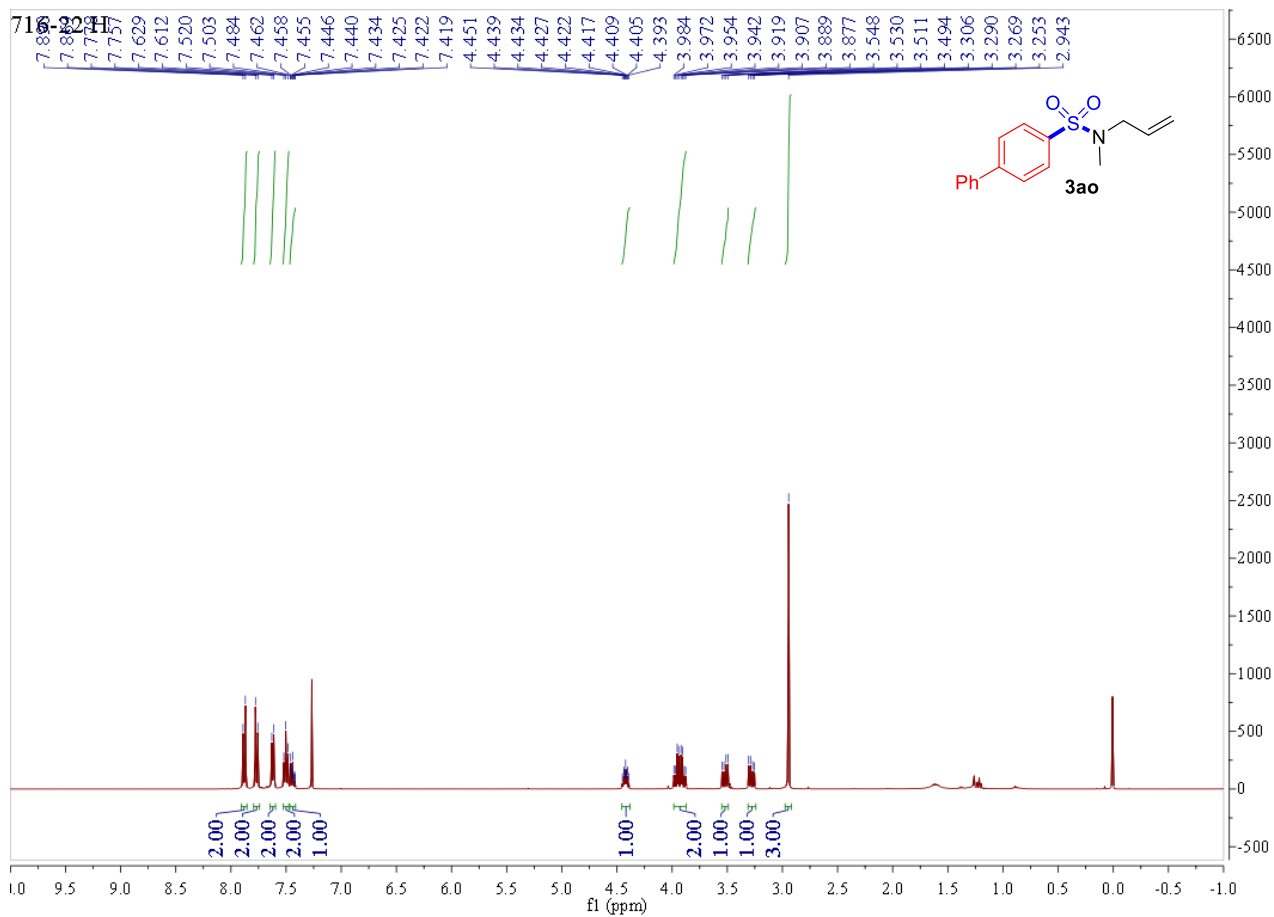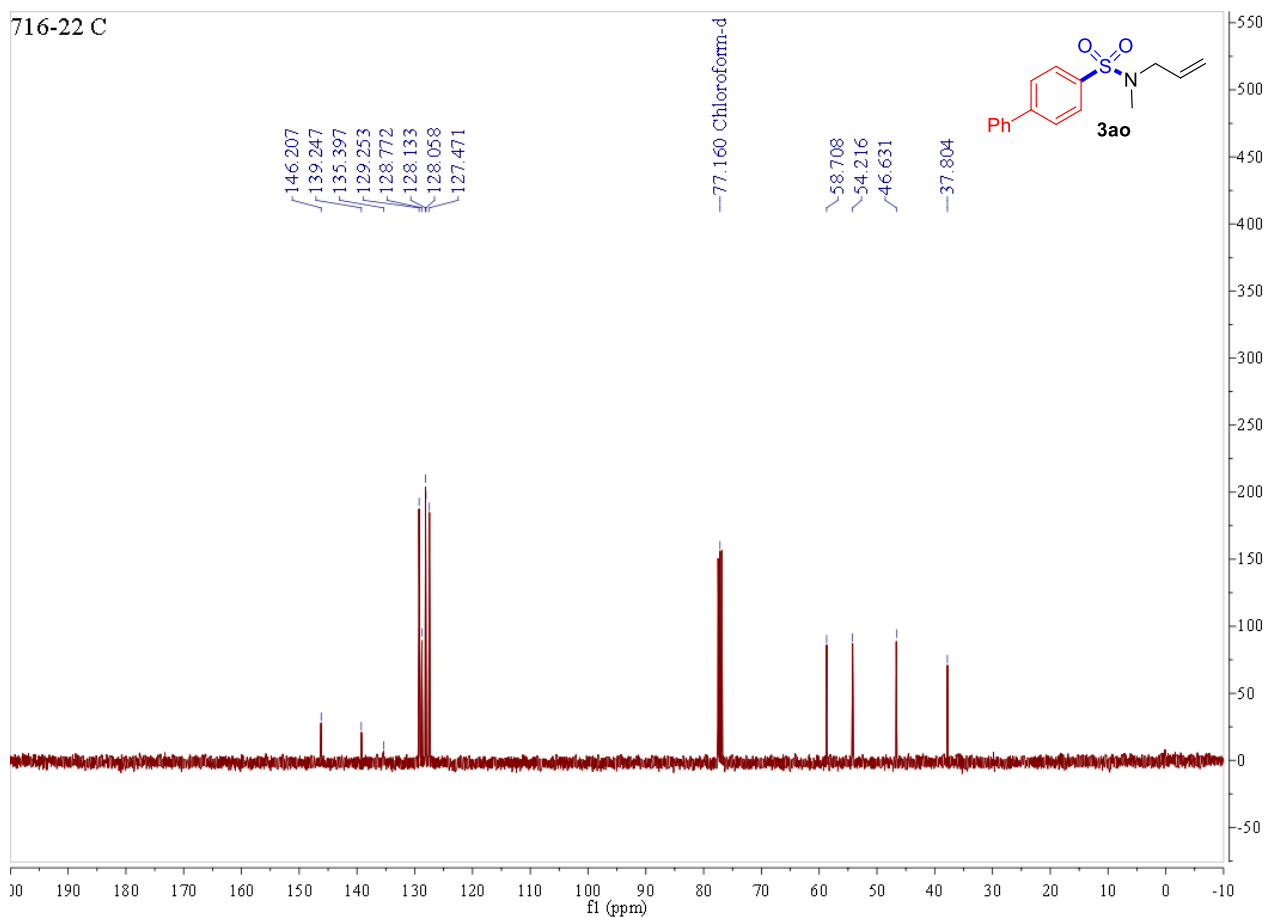

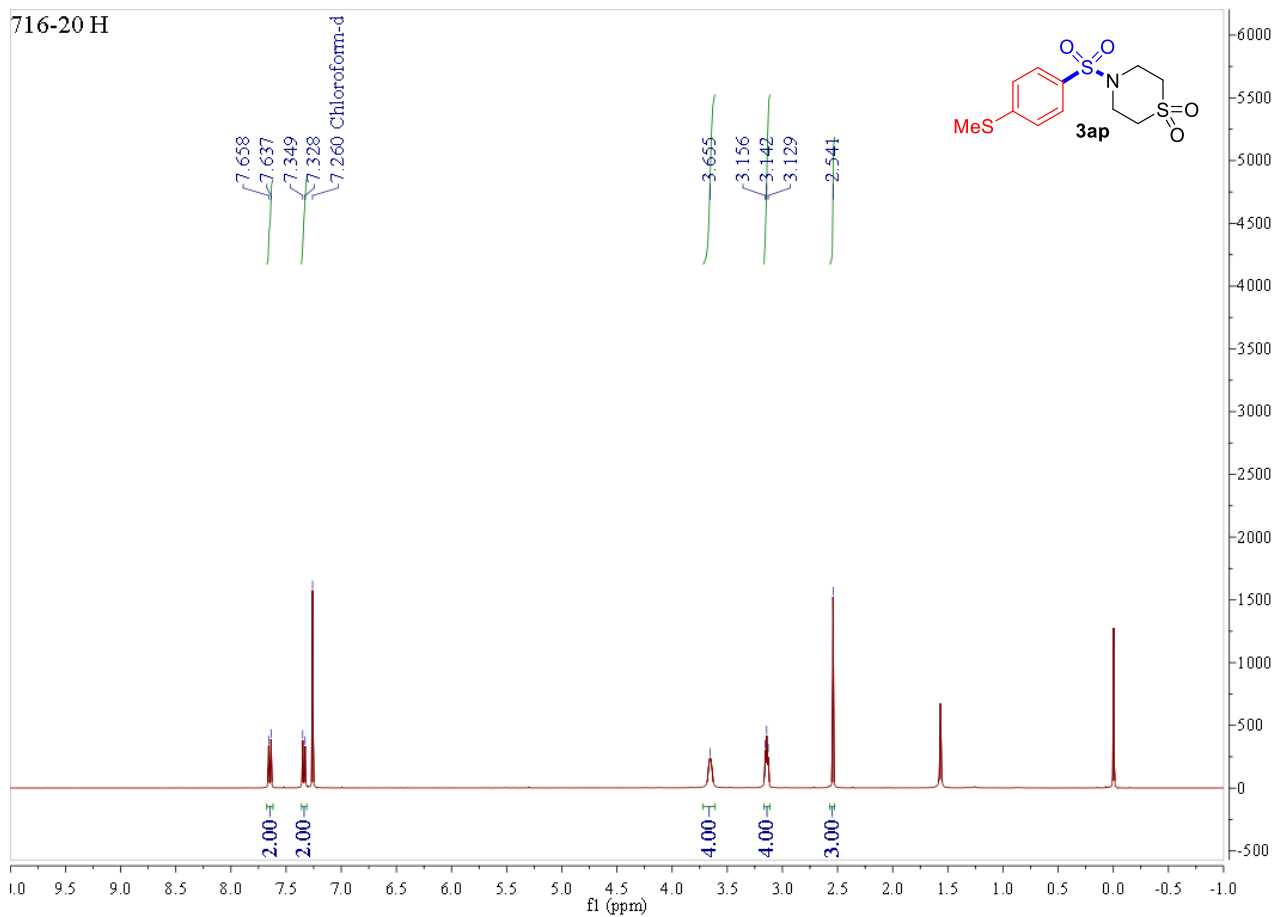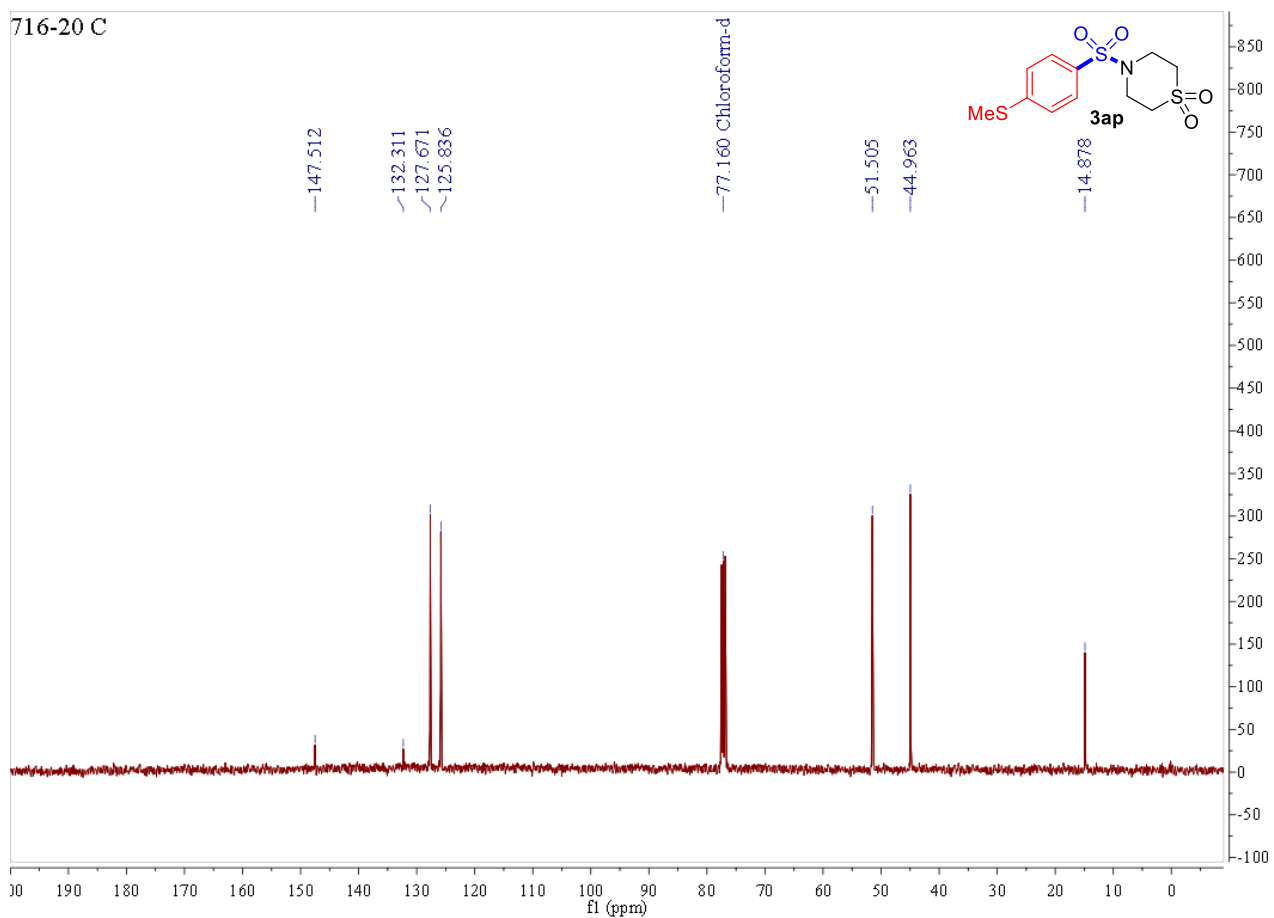

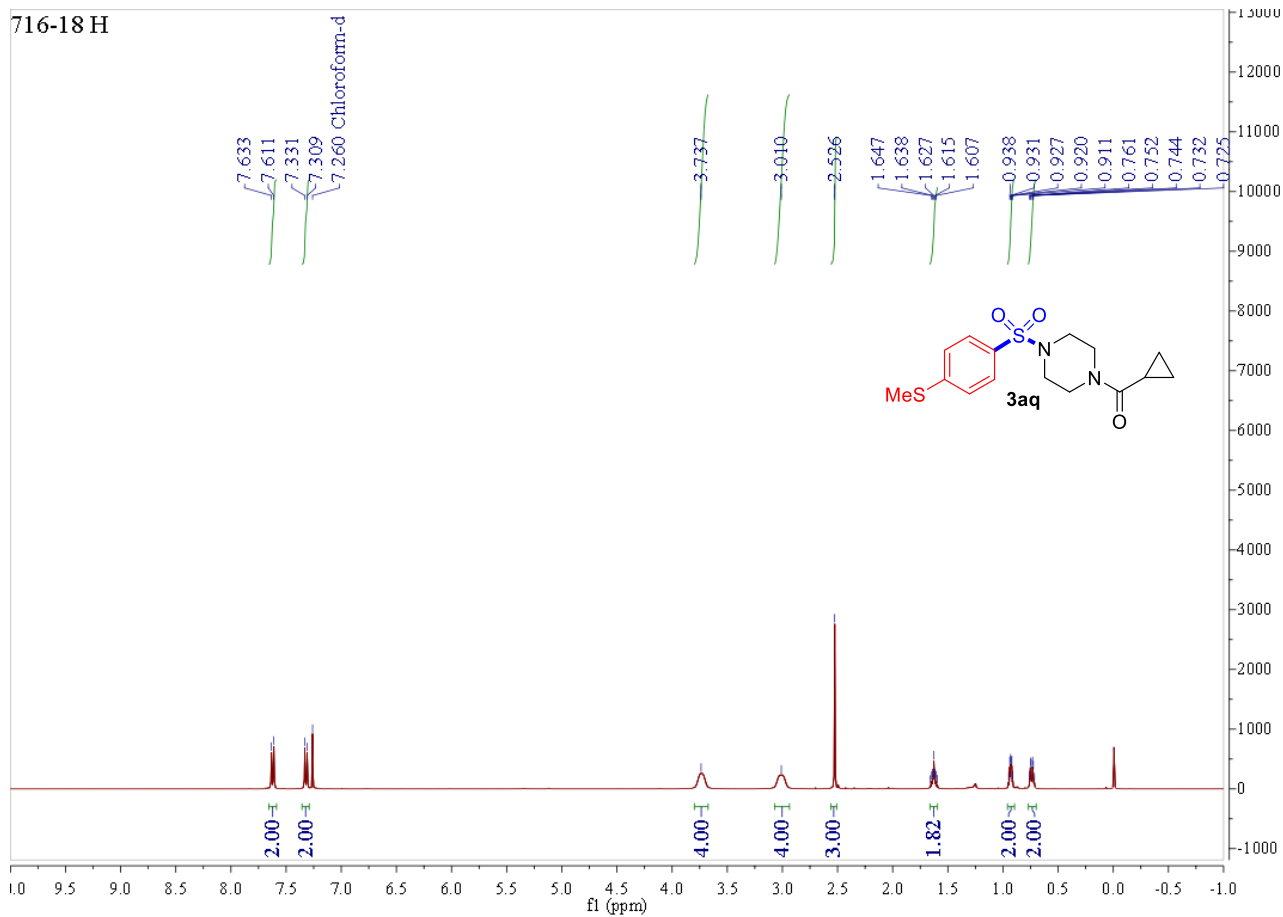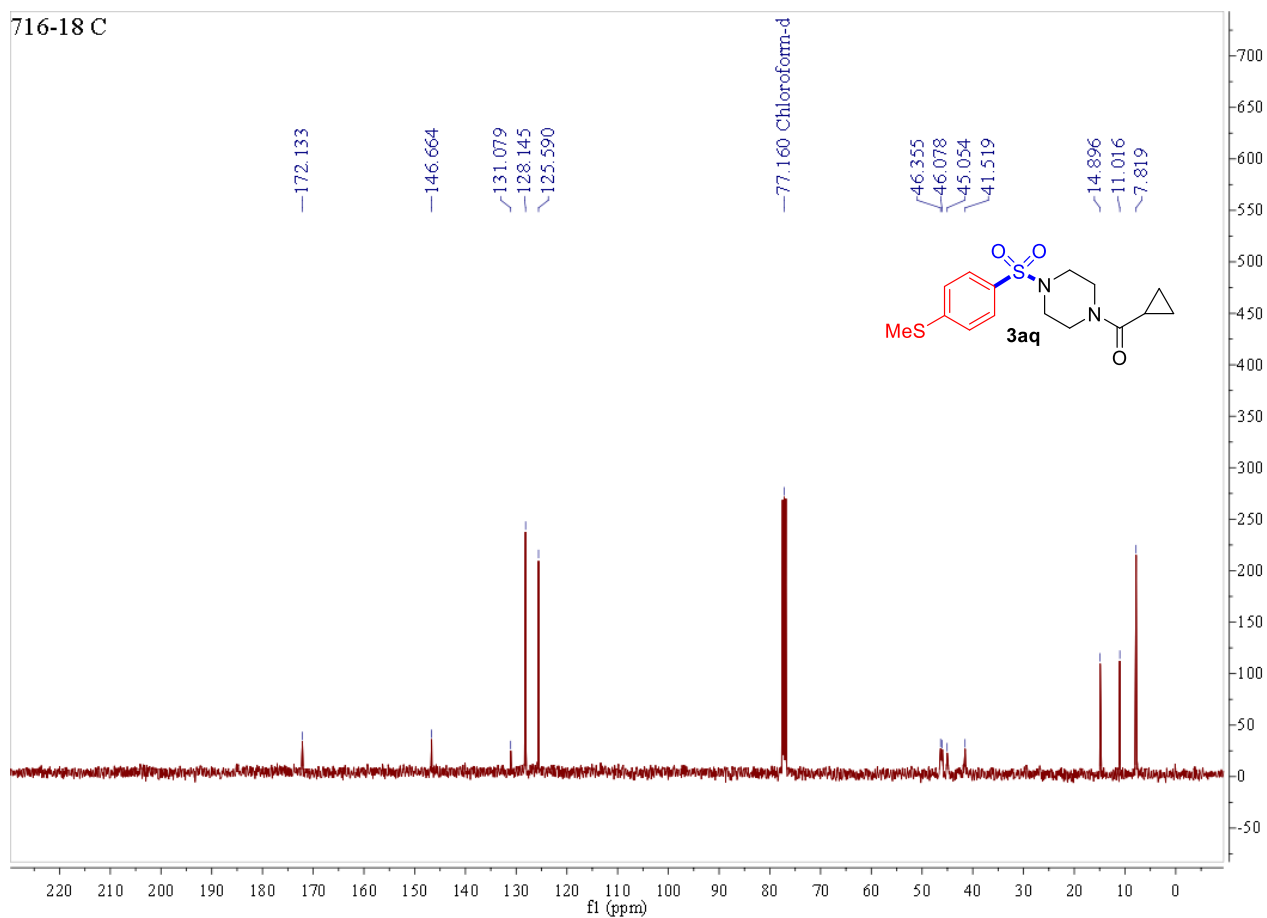

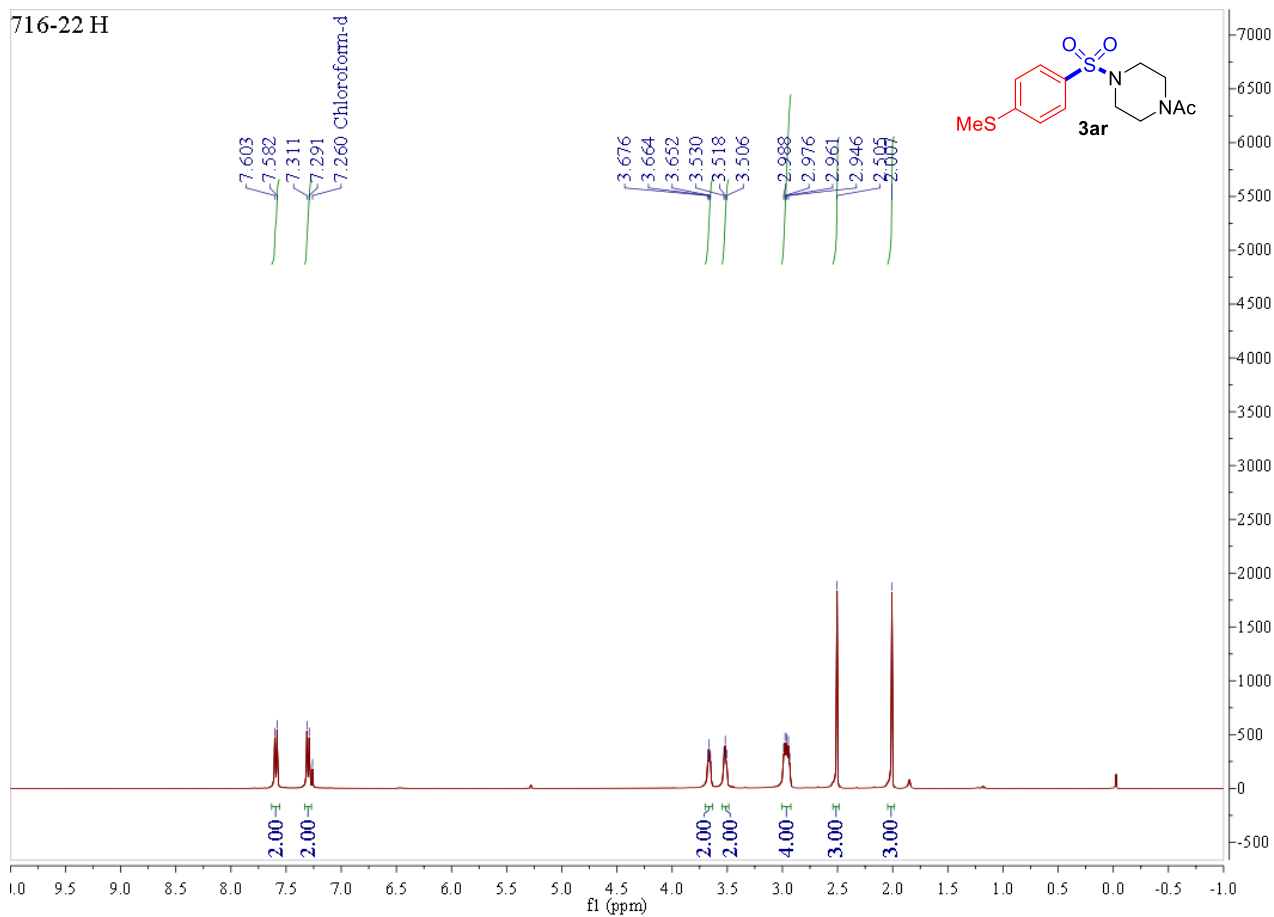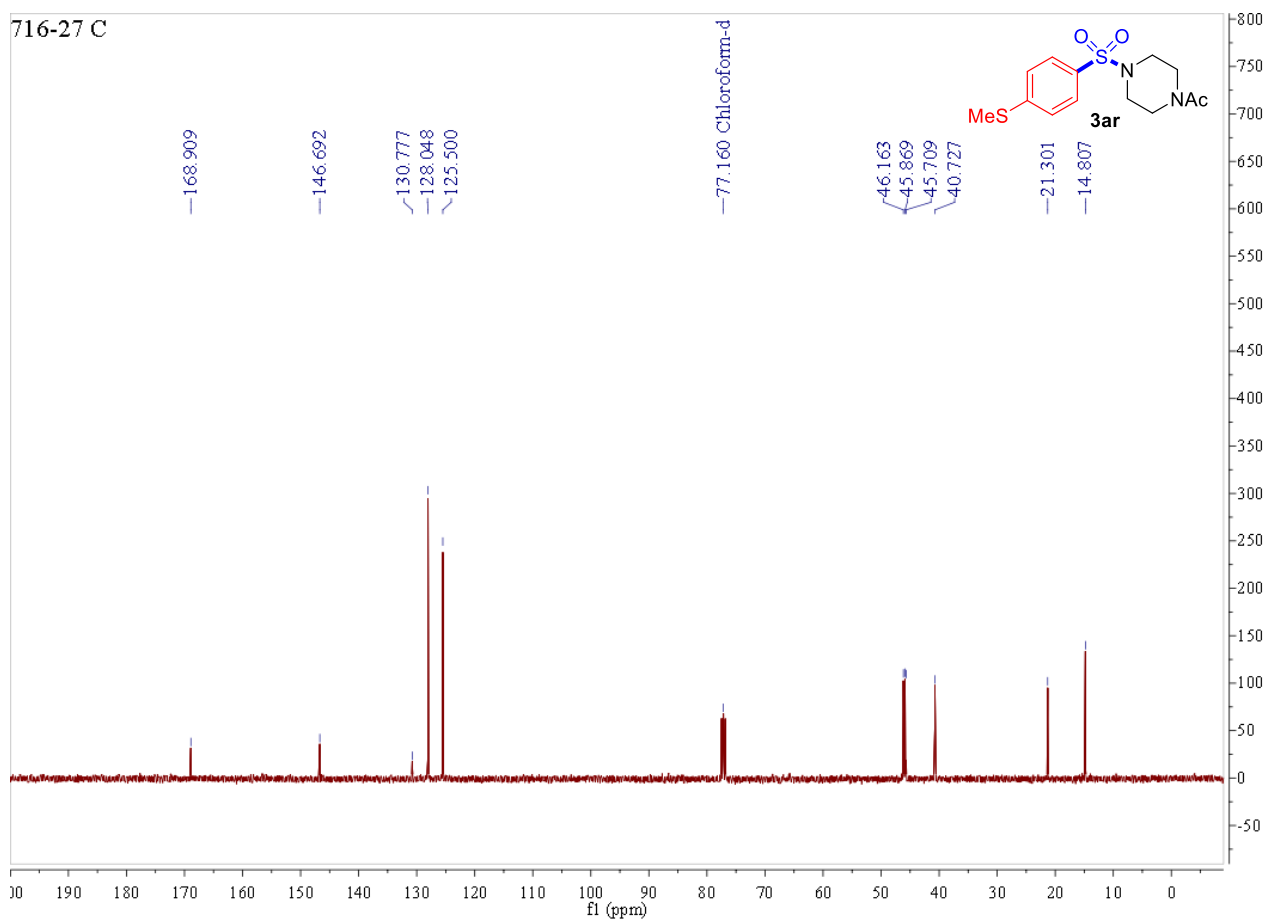

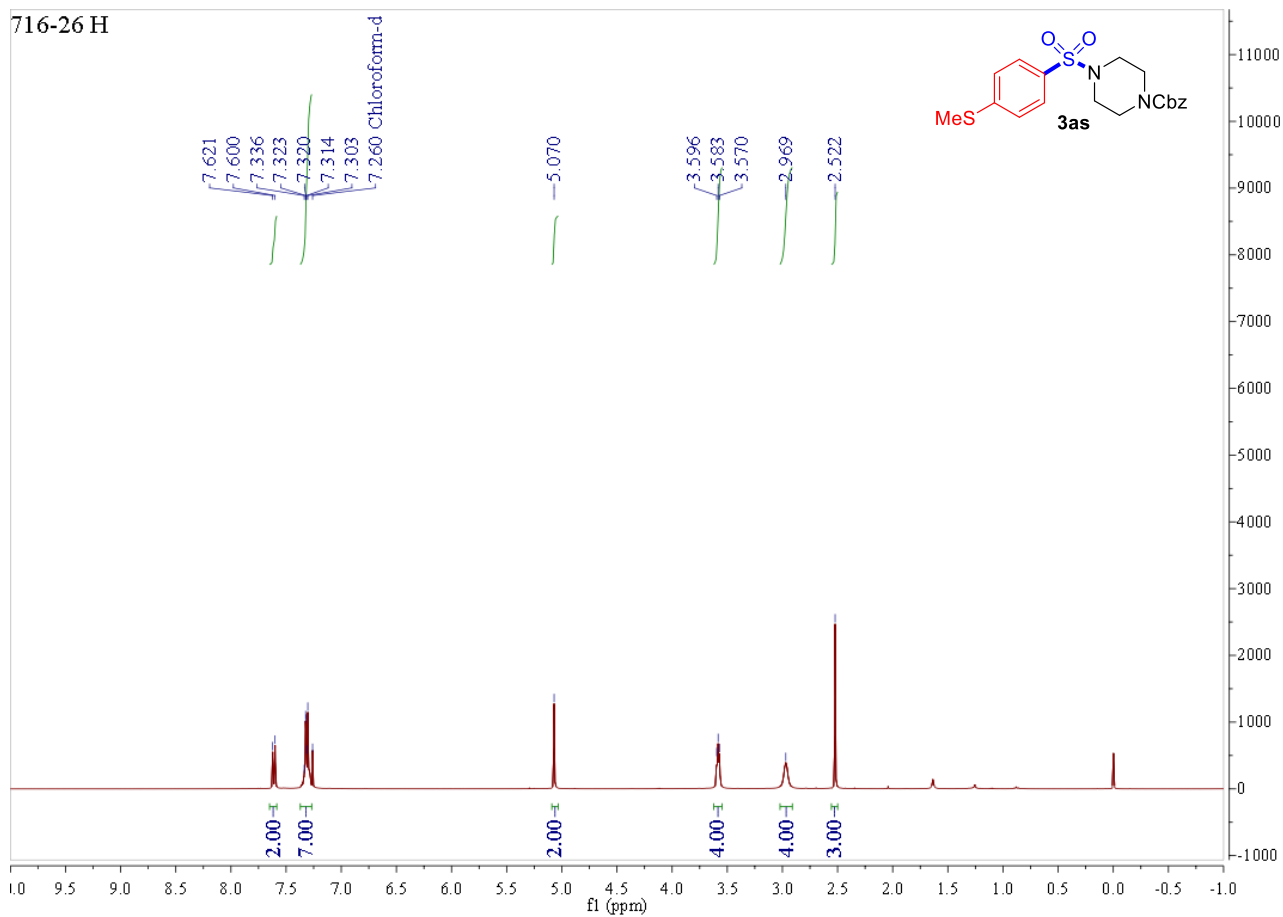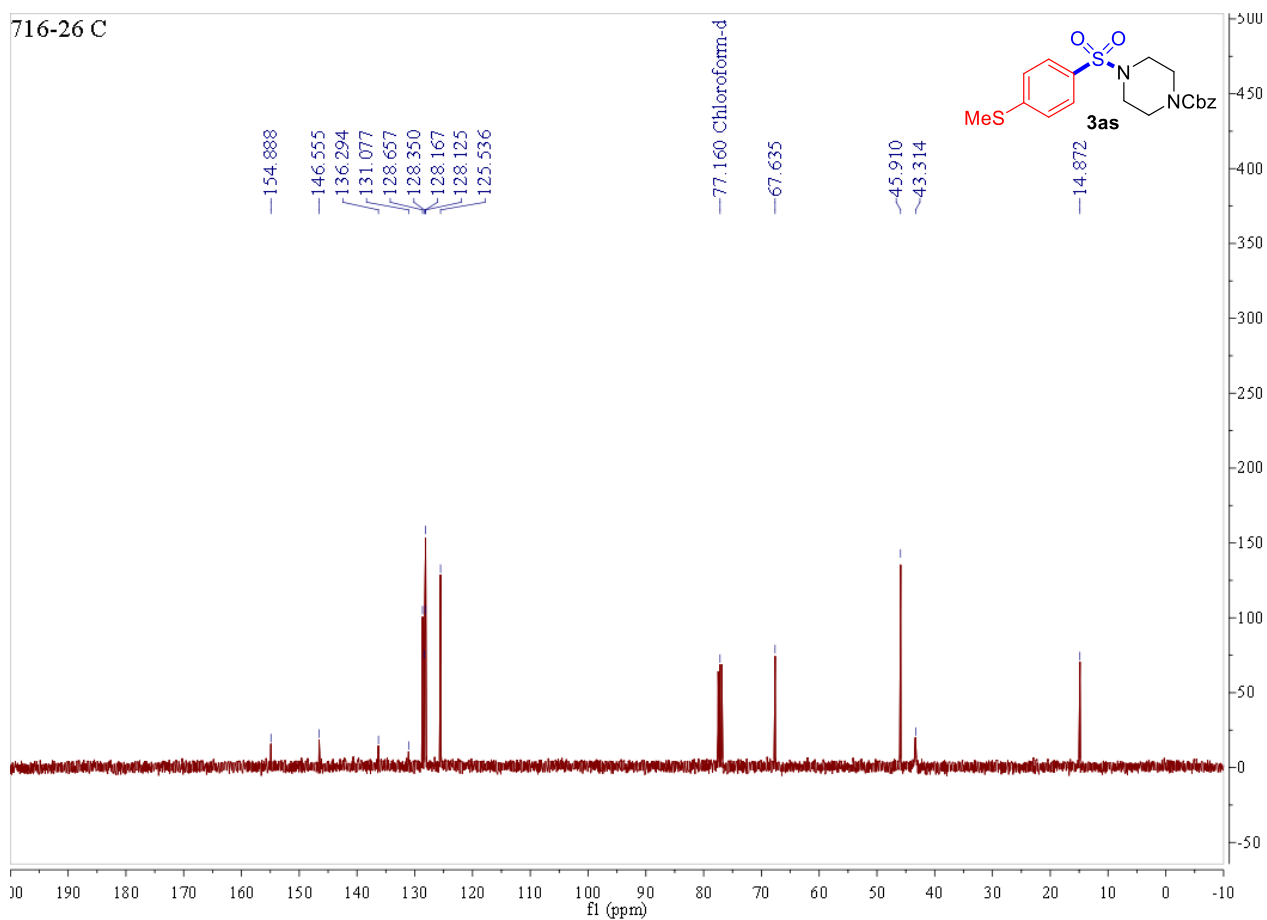



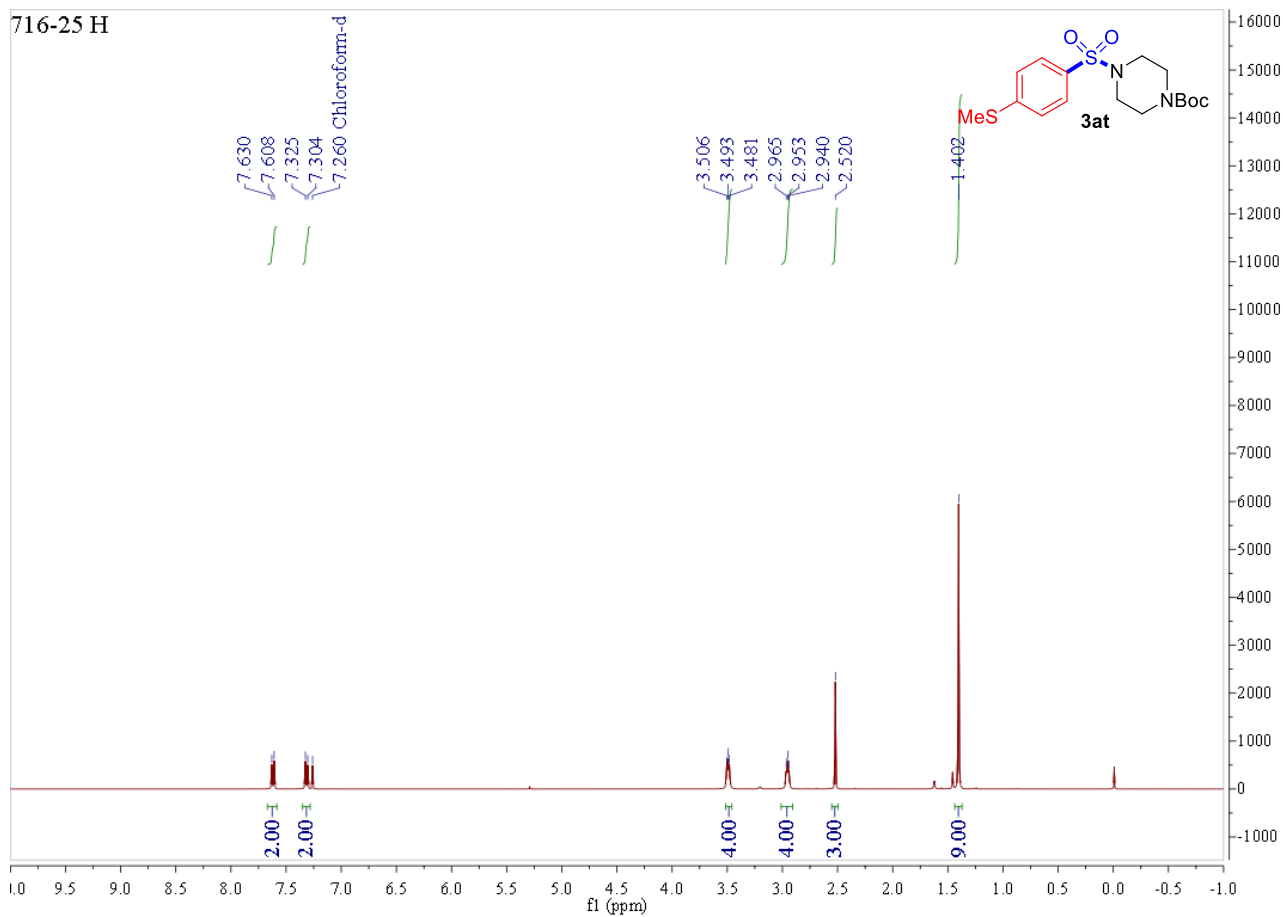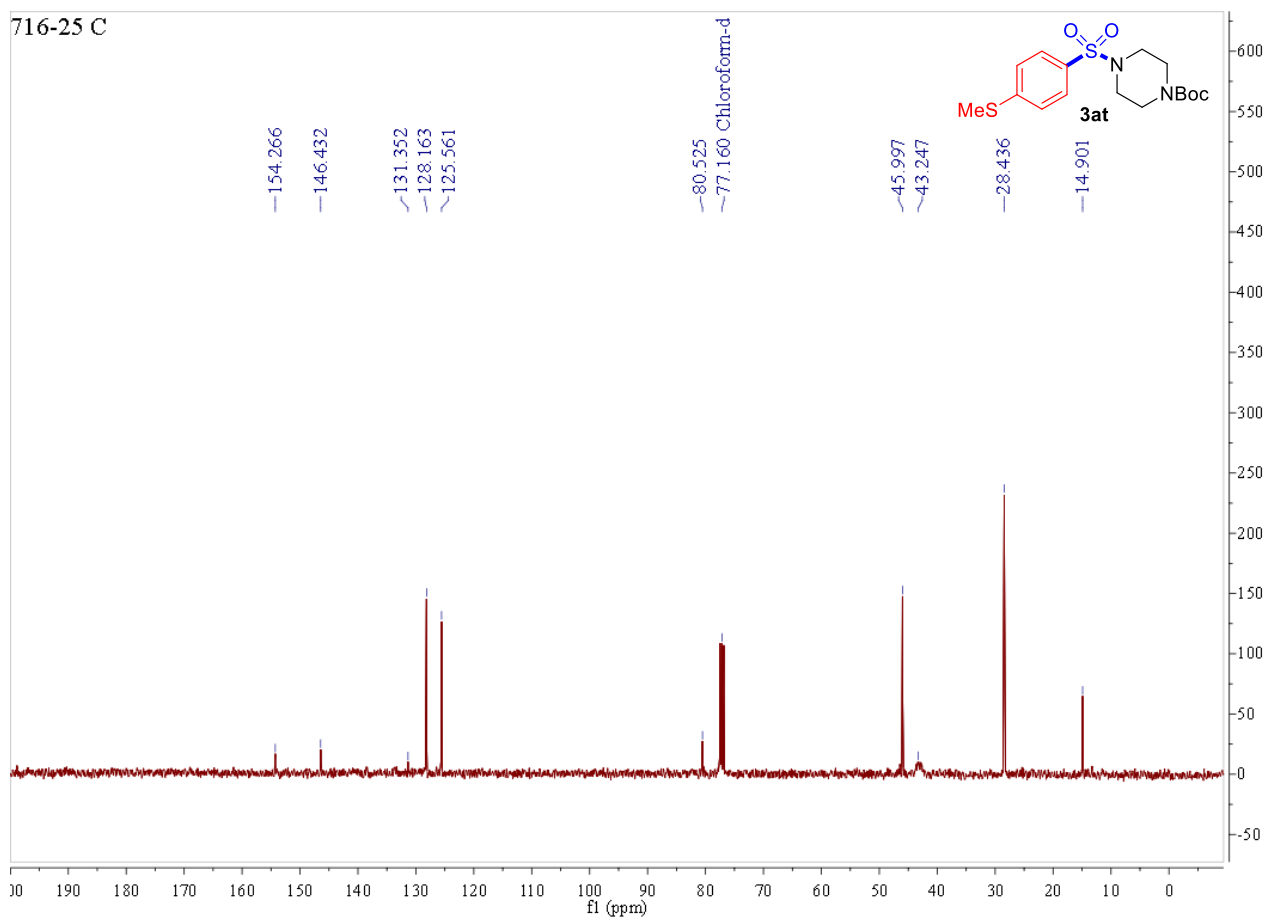

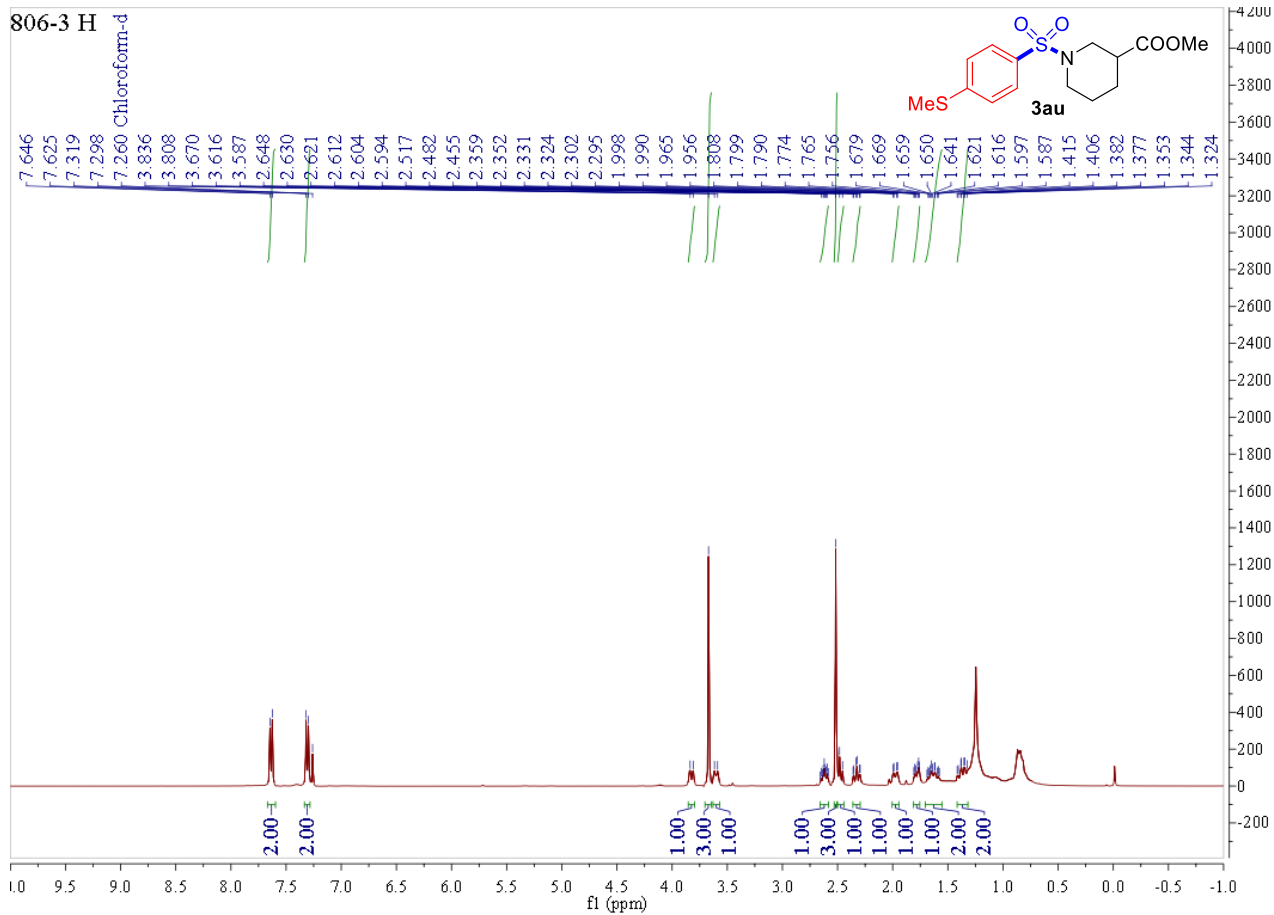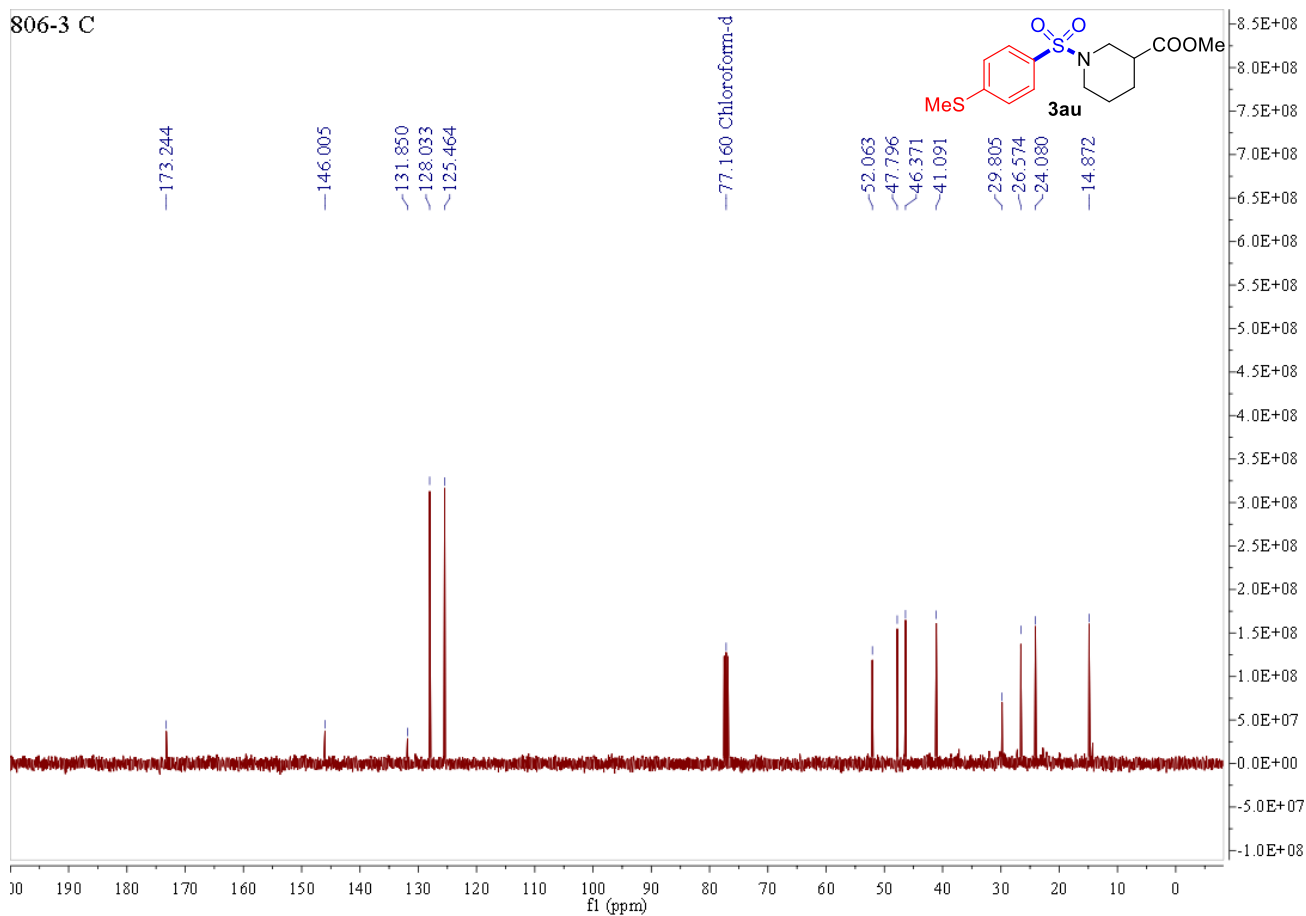

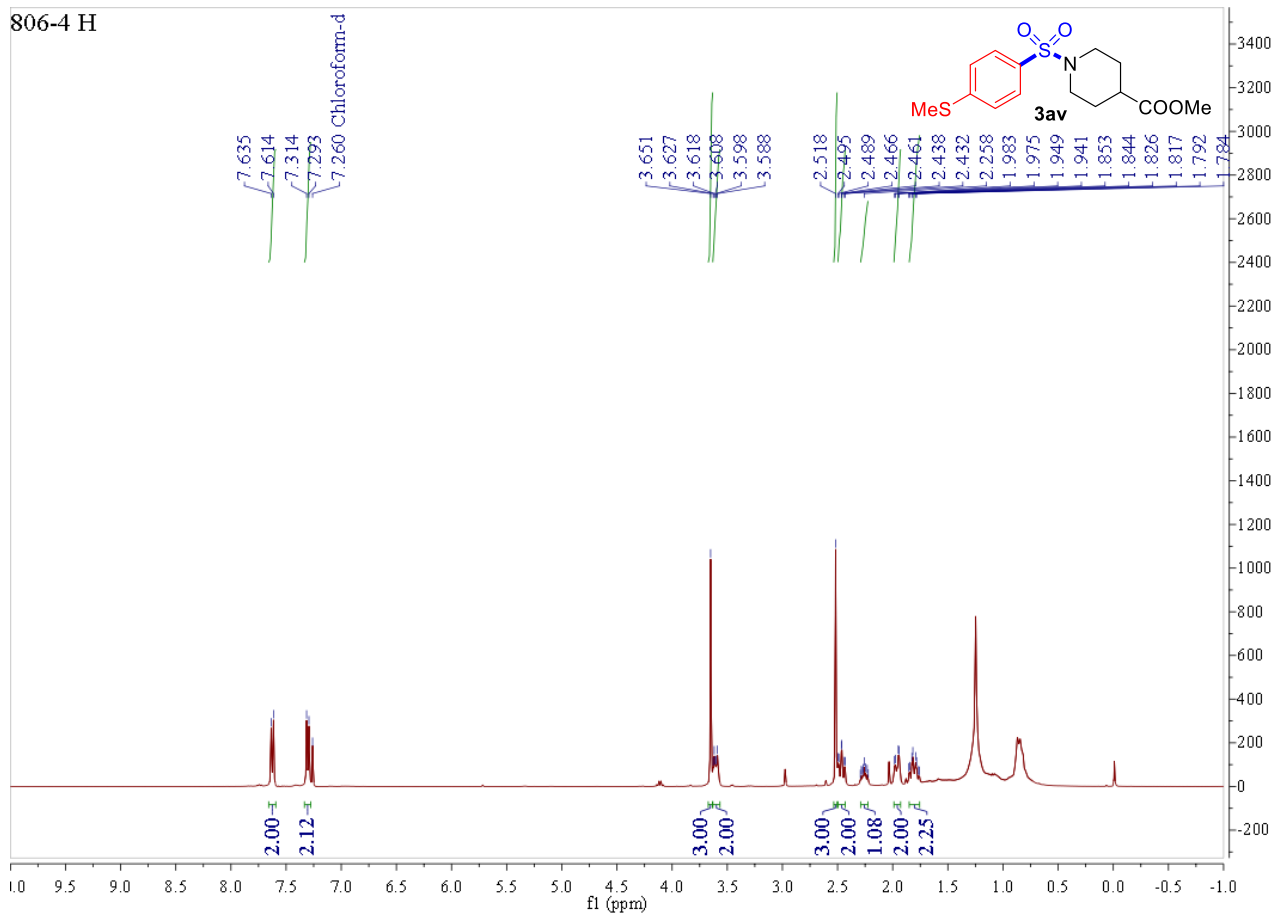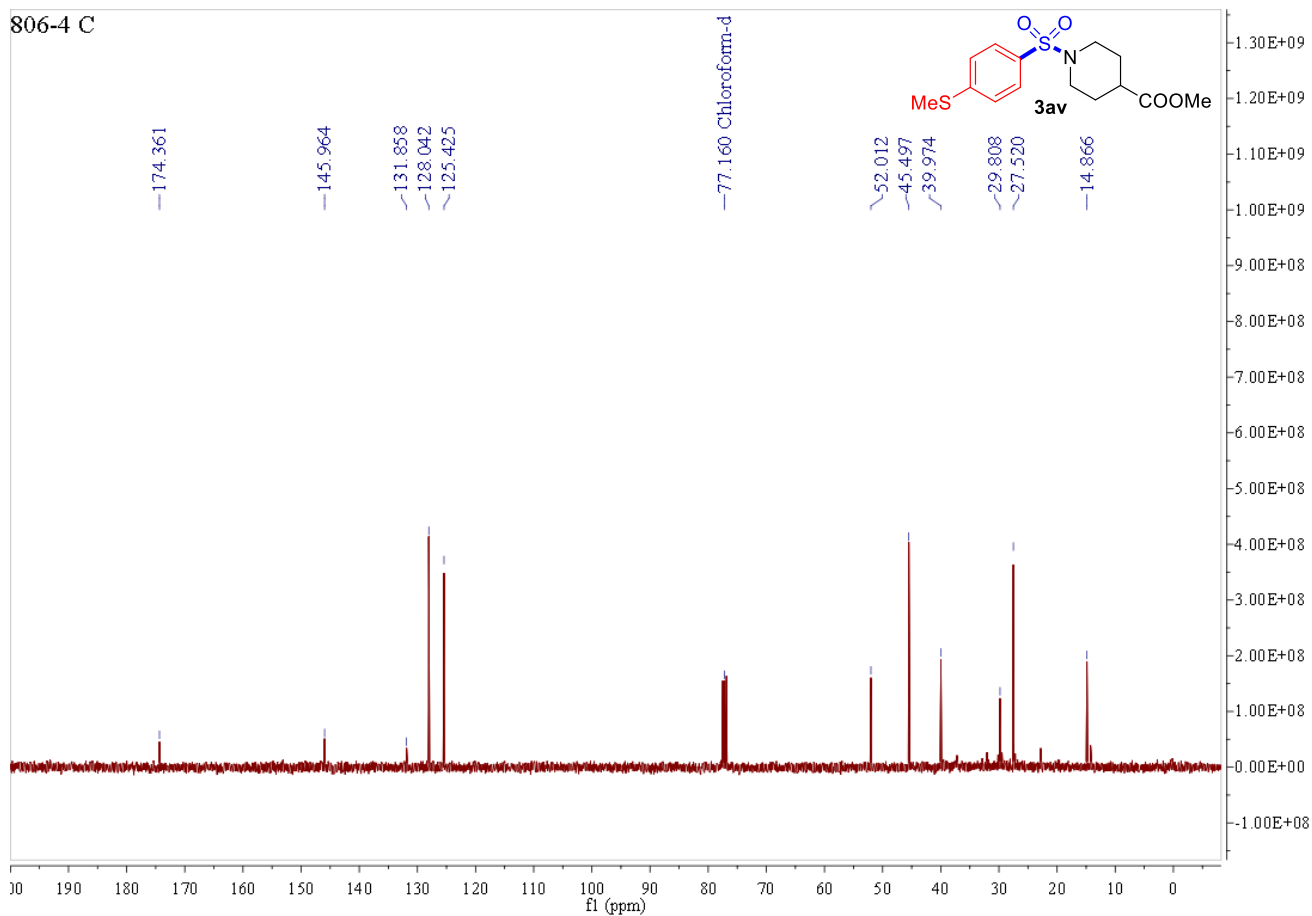

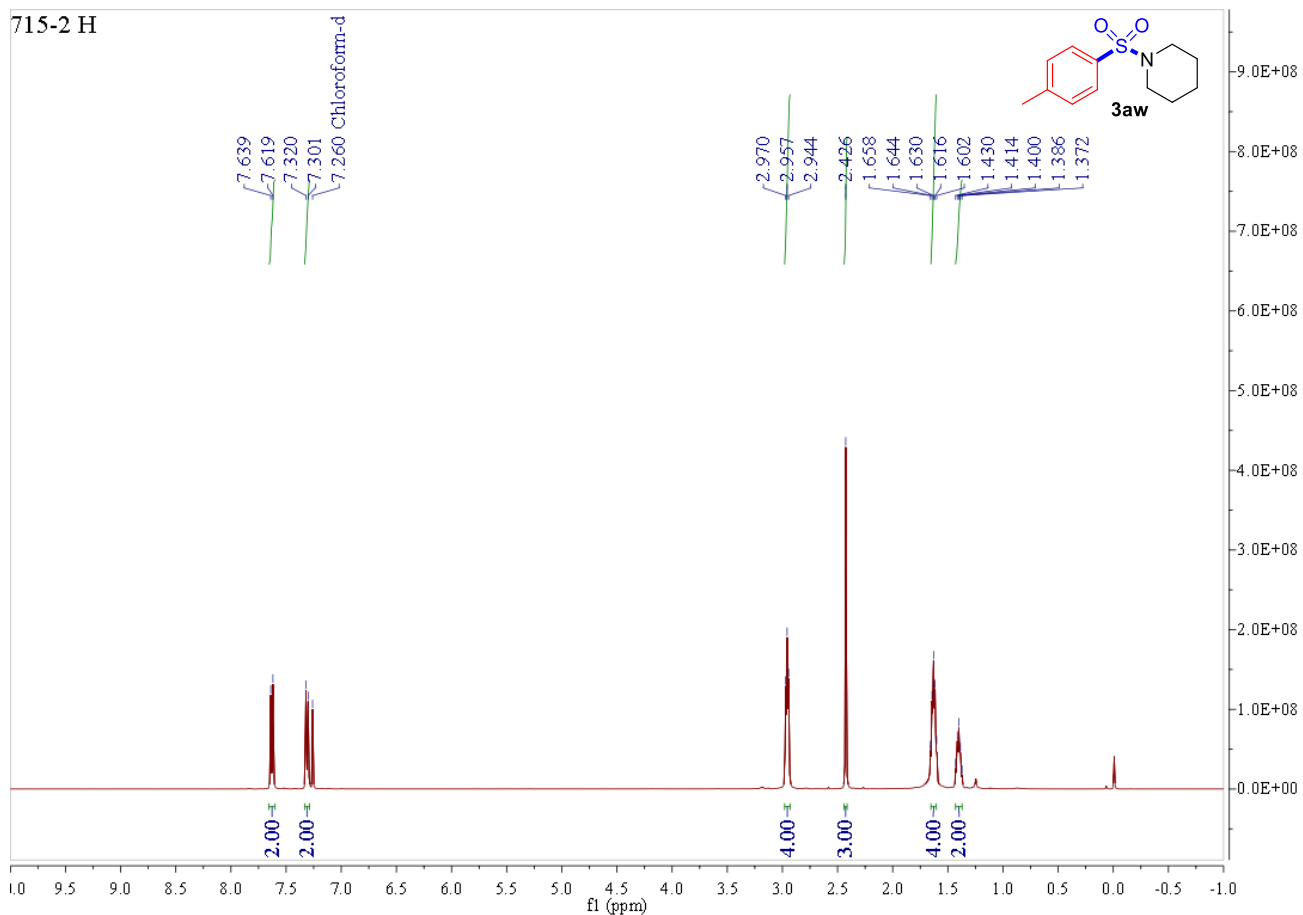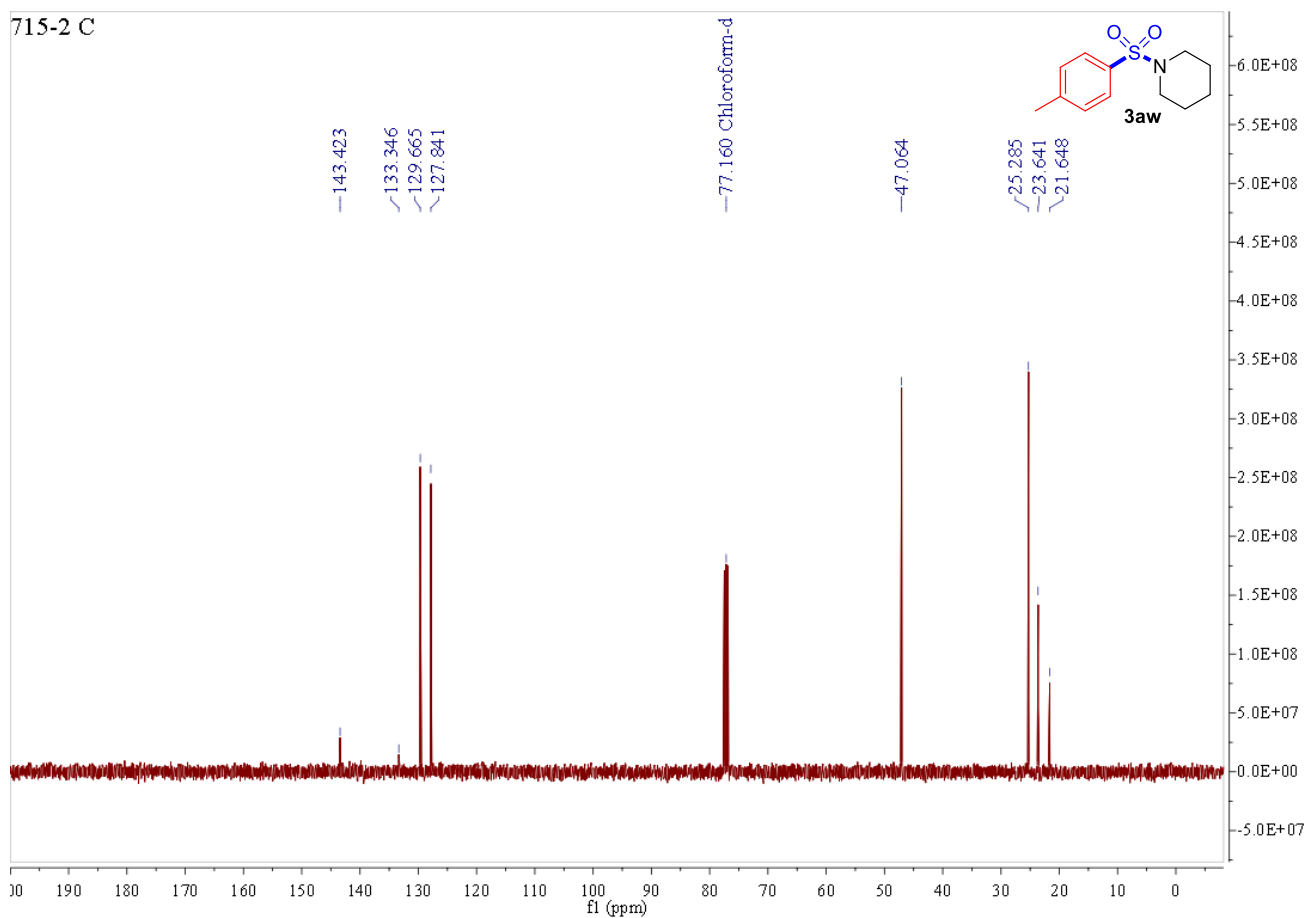

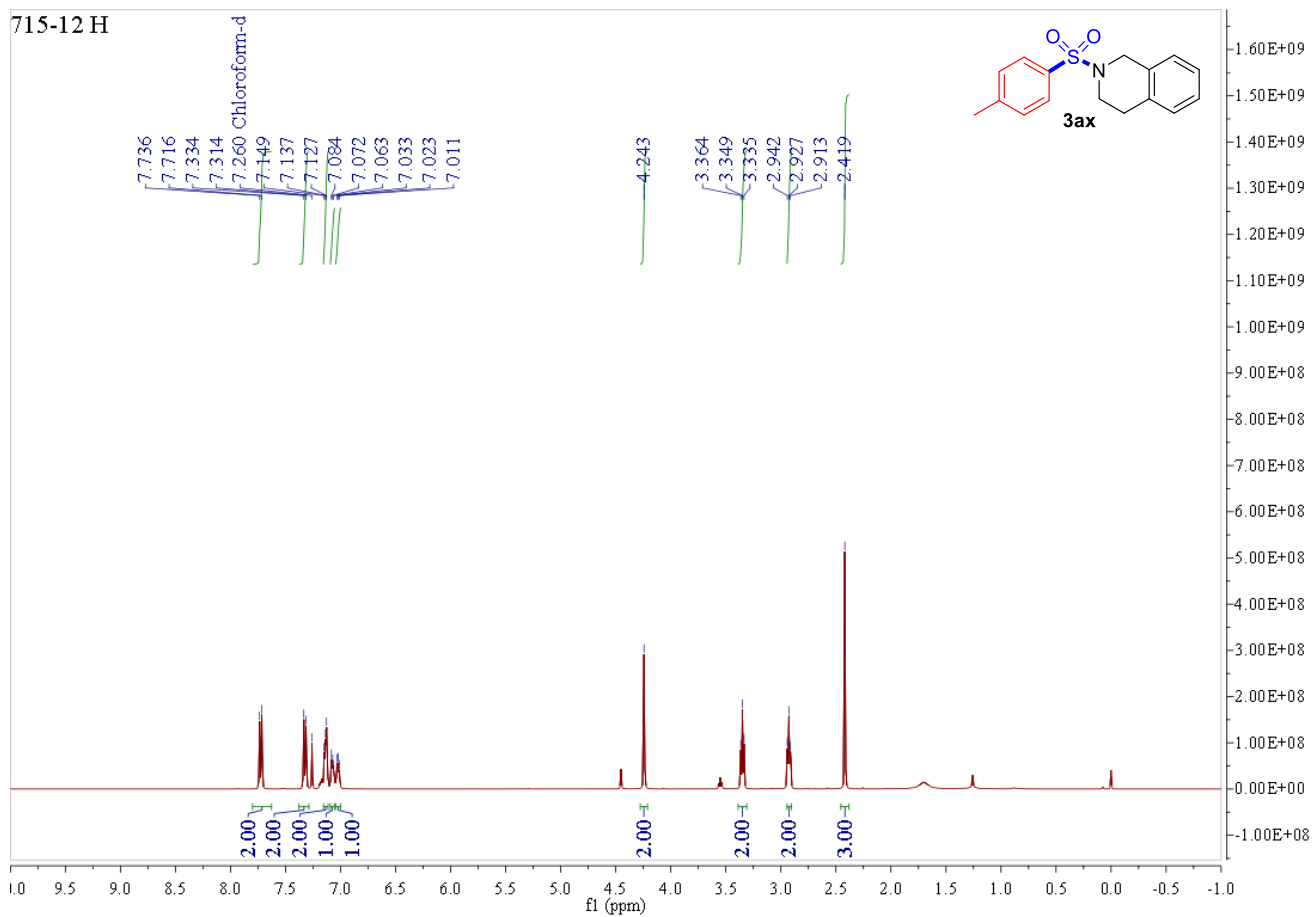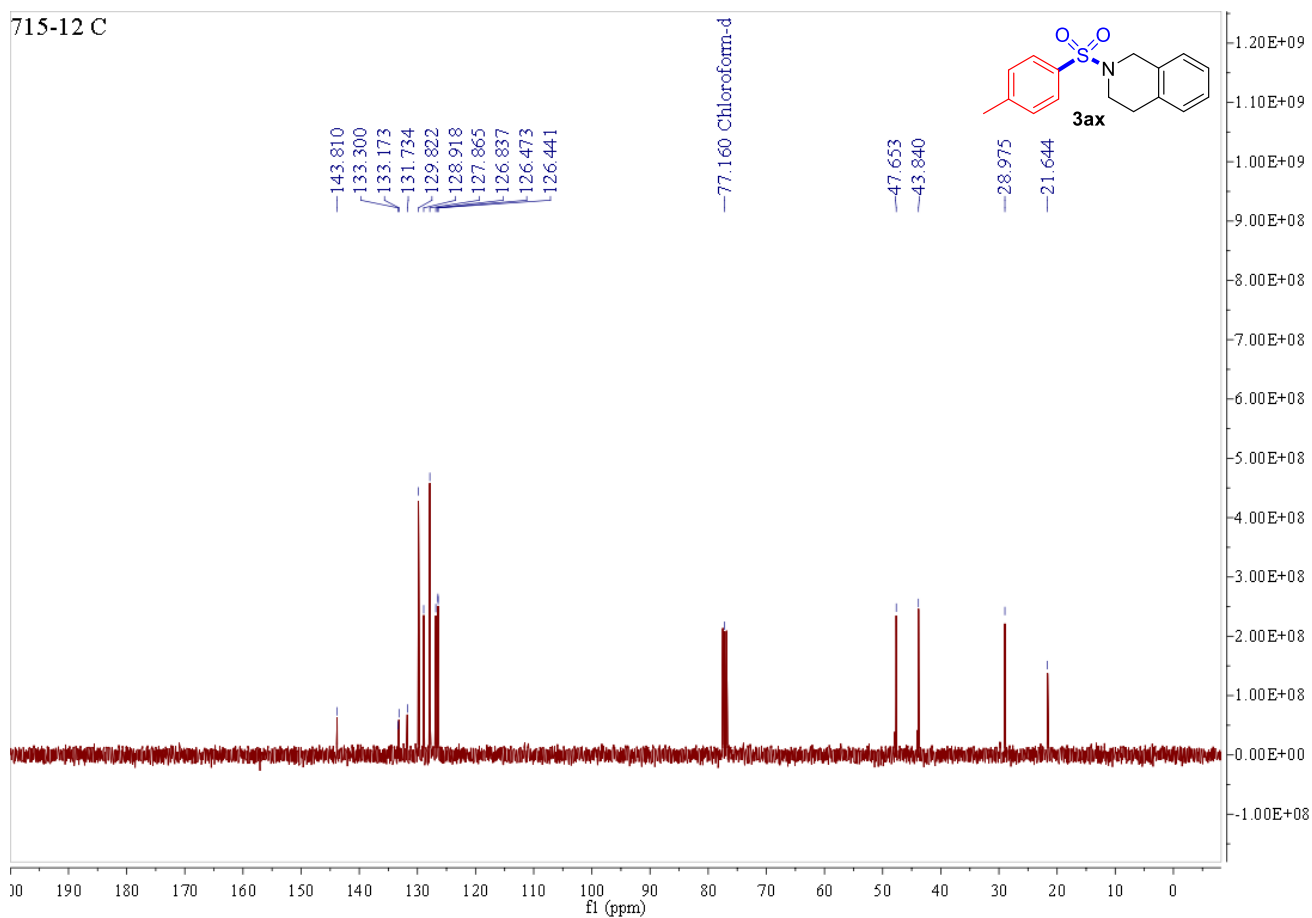

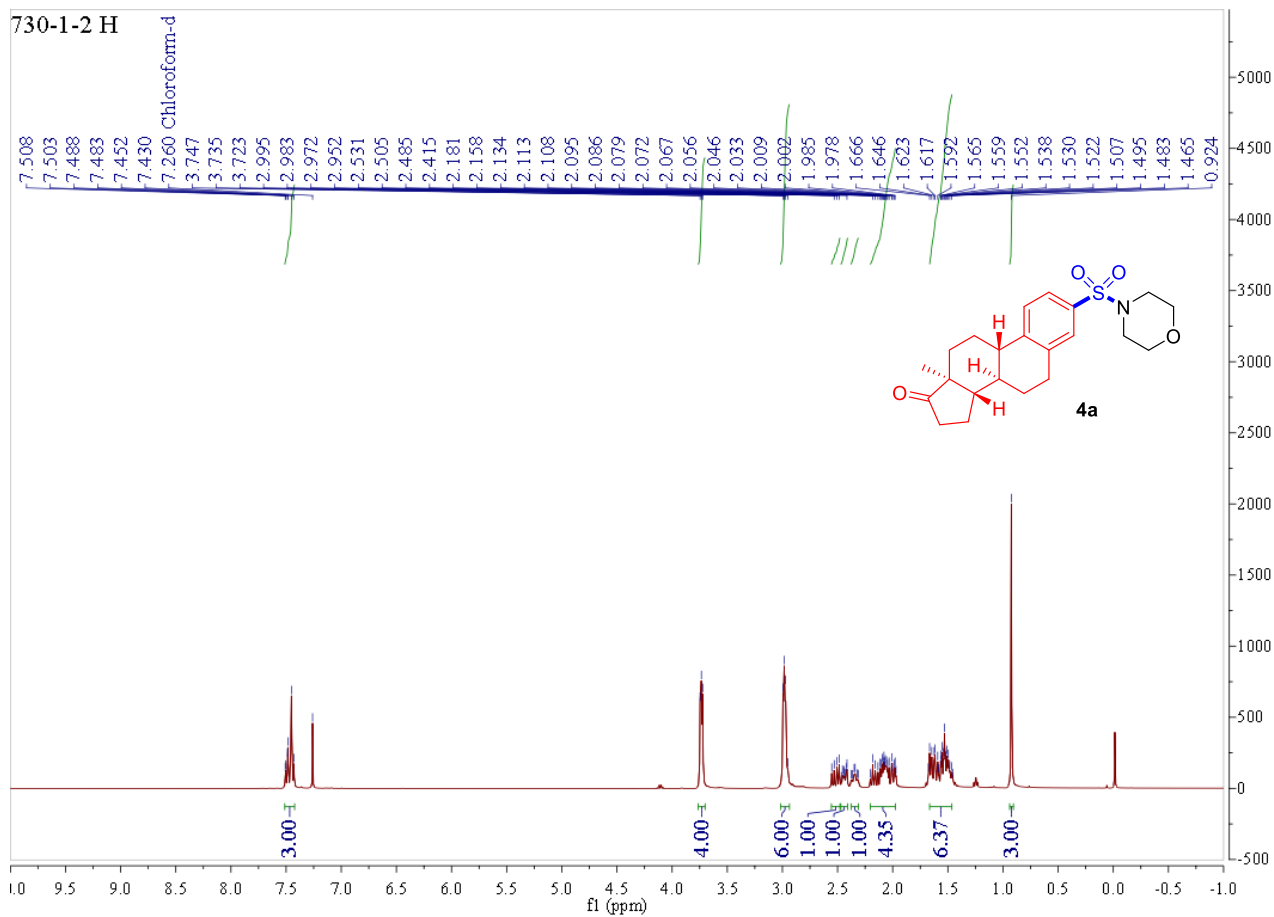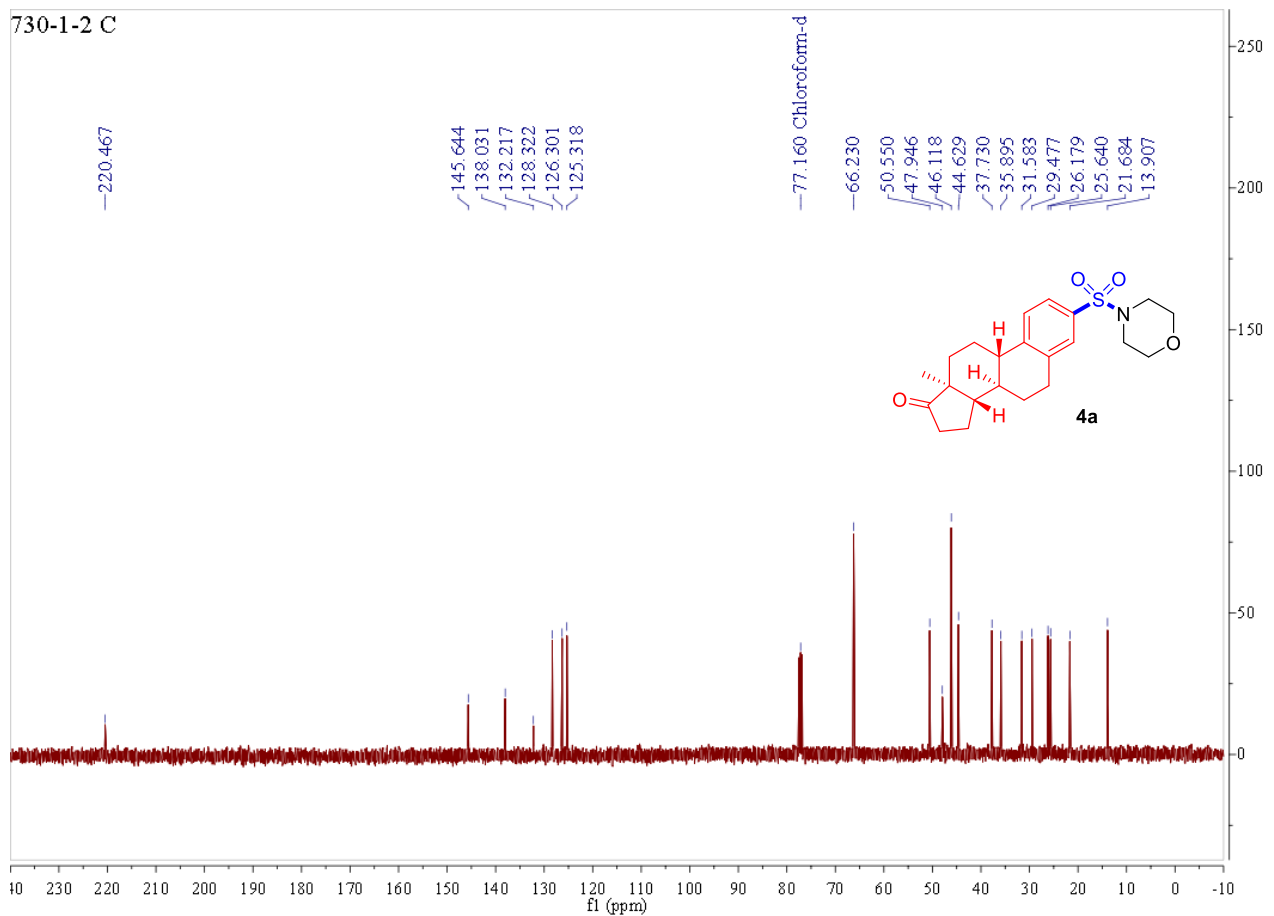

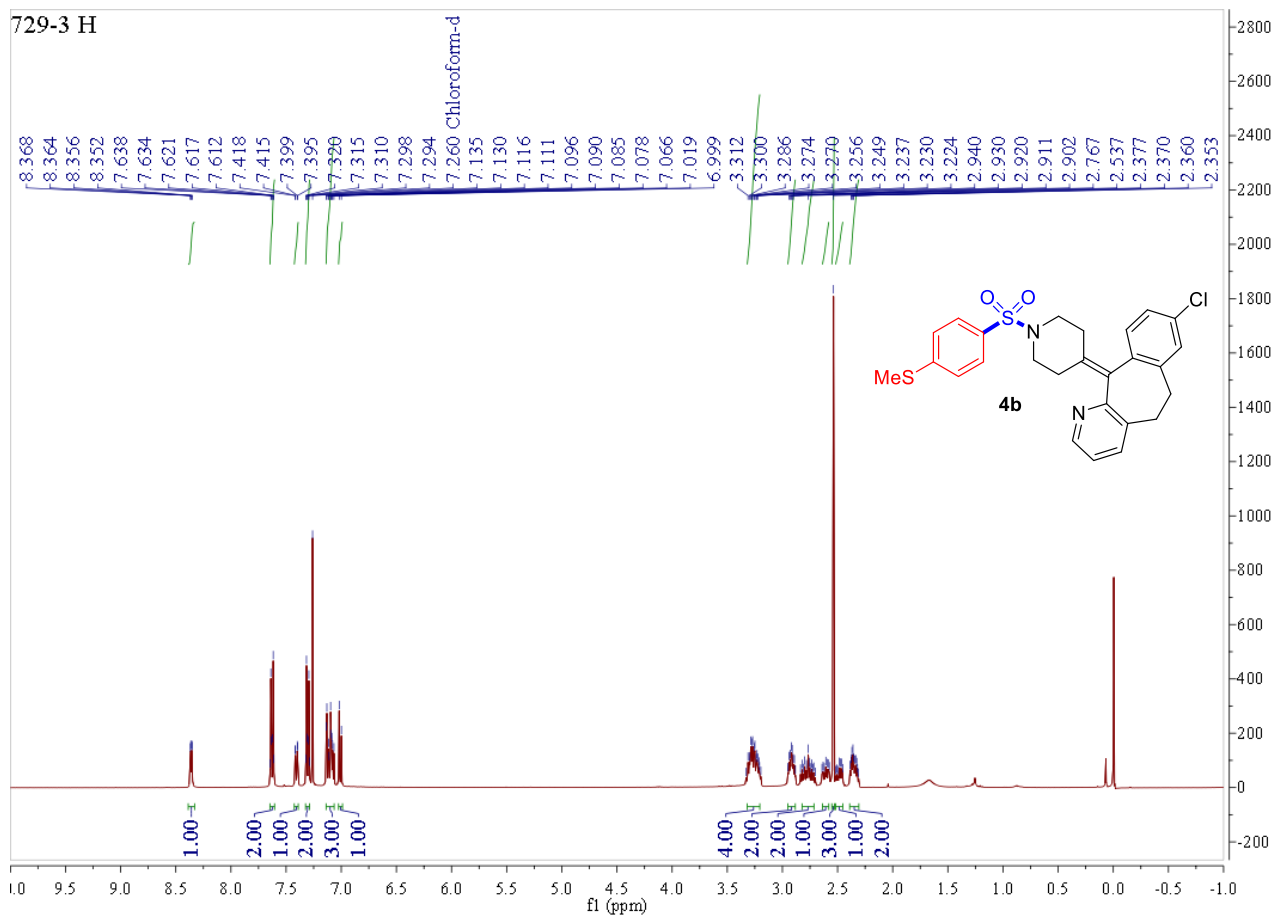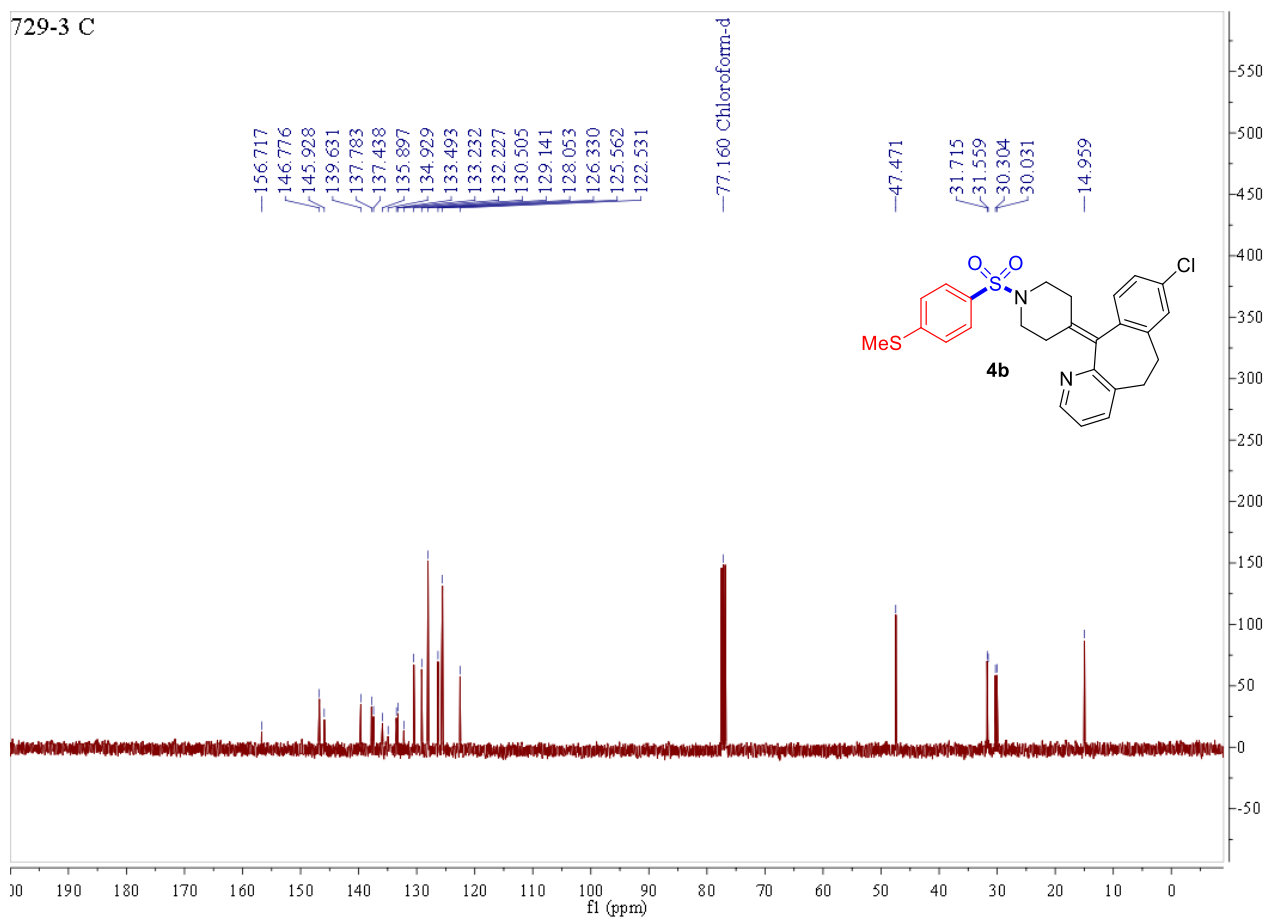

Supplement: d1sc01351c1.pdf [file d1sc01351c1.pdf]
